# Supplementary material for: DDQ-promoted direct C5-alkylation of oxazoles with alkylboronic acids via palladium-catalysed C–H bond activation
Source: Royal Society of Chemistry journal article supplement (doi:10.1039/c7ob01083d), 2017-01-01

*Electronic Supplementary Information*

---

**DDQ-promoted Direct C5-alkylation of Oxazole with Alkylboronic  
Acids via Palladium-catalyzed C-H Bond Activation**

Bowen Lei,<sup>†</sup> Xiaojiao Wang,<sup>†</sup> Lifang Ma,<sup>\*,†</sup> Huixuan Jiao,<sup>†</sup> Lisi Zhu<sup>†</sup> and Ziyuan  
Li,<sup>\*,†</sup>

<sup>†</sup>Department of Pharmaceutical and Biological Engineering, School of Chemical  
Engineering, Sichuan University, No. 24 South Section 1, Yihuan Road, Chengdu  
610065, China

E-mail: liziyuan@scu.edu.cn Fax: (+86) 28-8540-5221

mlfang11@scu.edu.cn Fax: (+86) 28-8540-5221

**Supporting Information**

**Table of Contents**

|                                                                         |         |
|-------------------------------------------------------------------------|---------|
| General Remarks                                                         | S2      |
| Experimental Procedure and Characterization Data for compounds <b>3</b> | S3~S11  |
| <sup>1</sup> H NMR, <sup>13</sup> C NMR spectra of compounds <b>3</b>   | S12~S61 |

## **General Remarks**

All commercially available compounds were purchased from Sigma-Aldrich, Alfa-Aesar, Acros, J&K Chemicals, Adamas and Aladdin Chemicals. Palladium(II) diacetate were purchased from Acros (99.9% purity, CAS No. 3375-31-3). Unless otherwise noted, materials obtained from commercial suppliers were used without further purification. Oxazole-4-carboxylic derivatives **1a-1p** were prepared from corresponding nitriles by our previous reported methods<sup>[1]</sup>. 2,4-Diphenyloxazole **1q** was prepared using the method in literature.<sup>[2]</sup> Products were purified by flash chromatography on silica gel using petroleum ether and ethyl acetate as the effluent. Melting point (m.p.) was measured on a microscopic melting point apparatus. <sup>1</sup>H-NMR spectra were recorded on Bruker AVANCE III-400 spectrometers. Chemical shifts (in ppm) were referenced with TMS in CDCl<sub>3</sub> (0 ppm). <sup>13</sup>C-NMR spectra were obtained by using the same NMR spectrometers and were calibrated with CDCl<sub>3</sub> ( $\delta$  = 77.00 ppm). High resolution mass spectra were obtained from an Agilent QTOF 6520 mass spectrometer with electron spray ionization (ESI) as the ion source.

## **References**

- [1] For the preparation of various oxazole-4-carboxylic derivative substrates, see: (a) Huang, Y.; Gan, H.; Li, S.; Xu, J.; Wu, X.; Yao, H. *Tetrahedron Lett.* **2010**, *51*, 1751. (b) Huang, Y.; Ni, L.; Gan, H.; He, Y.; Xu, J.; Wu, X.; Yao, H. *Tetrahedron* **2011**, *67*, 2066. (c) Wang, Y.; Li, Z.; Huang, Y.; Tang, C.; Wu, X.; Xu, J.; Yao, H. *Tetrahedron* **2011**, *67*, 7406.
- [2] For the preparation of various 2,4-diphenyloxazole, see: (a) Liu, L.; Feng, S.; Li, C. *ACS Sustainable Chem. Eng.* **2016**, *4*, 6754.

## **Experimental Procedure and Characterization Data**

**Typical Procedure:** To a reaction tube charged with Pd(OAc)<sub>2</sub> (6.7 mg, 0.03 mmol, 10 mol%), AgOAc (200 mg, 1.2 mmol, 4 eq), DDQ (34 mg, 0.15 mmol, 0.5 eq), alkylboronic acid **2** (1.2 mmol, 4 eq) was added a solution of oxazole **1** (0.3 mmol, 1 equiv) in ethylbenzene (1 mL) and acetic acid (1 mL). The reaction mixture was then stirred at 120 °C for 24 hours. After cooling to room temperature, the mixture was diluted with ethyl acetate, washed with saturated sodium bicarbonate, water and brine, dried over anhydrous sodium sulfate, and concentrated *in vacuo* to give dark residue, which was purified by flash chromatography (using petroleum ether and ethyl acetate as the effluent) on silica gel to afford the C5-alkylated oxazole **3a** – **3y**.

### **Methyl 5-*n*-Butyl-2-phenyloxazole-4-carboxylate (**3a**):**

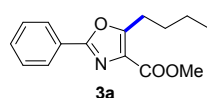

The reaction of 0.3 mmol of methyl 2-phenyloxazole-4-carboxylate (**1a**) and 1.2 mmol of *n*-butylboronic acid (**2a**) afforded 80% of **3a** after flash chromatography on silica gel using petroleum ether and ethyl acetate (15:1, *v/v*) as the effluent. Colorless oil. <sup>1</sup>H NMR (CDCl<sub>3</sub>, 400 MHz): δ = 8.09-8.07 (m, 2H), 7.46-7.44 (m, 3H), 3.95 (s, 3H), 3.12 (t, 2H, *J* = 7.6 Hz), 1.75 (p, 2H, *J* = 7.6 Hz), 1.43 (h, 2H, *J* = 7.6 Hz), 0.97 (t, 3H, *J* = 7.6 Hz) ppm; <sup>13</sup>C NMR (CDCl<sub>3</sub>, 100 MHz): δ = 162.8, 160.3, 159.6, 130.7, 128.7, 128.0, 126.6, 126.5, 51.9, 29.8, 25.7, 22.2, 13.6 ppm; HRMS *m/z* (ESI) calcd for [C<sub>15</sub>H<sub>17</sub>NO<sub>3</sub>+H]<sup>+</sup> 260.1287, found 260.1282.

### **Methyl 5-*n*-Butyl-2-(4-methylphenyl)oxazole-4-carboxylate (**3b**):**

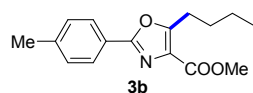

The reaction of 0.3 mmol of methyl 2-(4-methylphenyl)oxazole-4-carboxylate (**1b**) and 1.2 mmol of *n*-butylboronic acid (**2a**) afforded 81% of **3b** after flash chromatography on silica gel using petroleum ether and ethyl acetate (20:1 to 15:1, *v/v*) as the effluent. Offwhite solid, m.p. 63-65 °C. <sup>1</sup>H NMR (CDCl<sub>3</sub>, 400 MHz): δ = 7.96 (d, 2H, *J* = 8.4 Hz), 7.26 (d, 2H, *J* = 8.4 Hz), 3.94 (s, 3H), 3.11 (t, 2H, *J* = 7.2 Hz), 2.40 (s, 3H), 1.74 (p, 2H, *J* = 7.2 Hz), 1.43 (h, 2H, *J* = 7.2 Hz), 0.96 (t, 3H, *J* = 7.2 Hz) ppm; <sup>13</sup>C NMR (CDCl<sub>3</sub>, 100 MHz): δ = 162.8, 160.0, 159.8, 141.0, 129.3, 127.9, 126.5, 123.9, 51.8, 29.8, 25.7, 22.2, 21.4, 13.6 ppm; HRMS *m/z* (ESI) calcd for [C<sub>16</sub>H<sub>19</sub>NO<sub>3</sub>+H]<sup>+</sup> 274.1443, found 274.1439.

**Methyl 5-*n*-Butyl-2-(2-methylphenyl)oxazole-4-carboxylate (3c):**

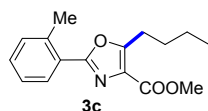

The reaction of 0.3 mmol of methyl 2-(2-methylphenyl)oxazole-4-carboxylate (**1c**) and 1.2 mmol of *n*-butylboronic acid (**2a**) afforded 75% of **3c** after flash chromatography on silica gel using petroleum ether and ethyl acetate (20:1 to 15:1, *v/v*) as the effluent. Colorless oil. **<sup>1</sup>H NMR (CDCl<sub>3</sub>, 400 MHz):**  $\delta$  = 8.00-7.97 (m, 1H), 7.37-7.33 (m, 1H), 7.29-7.27 (m, 2H), 3.94 (s, 3H), 3.13 (t, 2H, *J* = 7.2 Hz), 2.67 (s, 3H), 1.75 (p, 2H, *J* = 7.2 Hz), 1.43 (h, 2H, *J* = 7.2 Hz), 0.96 (t, 3H, *J* = 7.2 Hz) ppm; **<sup>13</sup>C NMR (CDCl<sub>3</sub>, 100 MHz):**  $\delta$  = 162.9, 160.1, 160.0, 137.4, 131.5, 130.3, 129.2, 127.8, 125.9, 125.8, 51.8, 29.8, 25.6, 22.2, 21.7, 13.6 ppm; **HRMS *m/z* (ESI)** calcd for [C<sub>16</sub>H<sub>19</sub>NO<sub>3</sub>+Na]<sup>+</sup> 296.1263, found 296.1265.

**Methyl 5-*n*-Butyl-2-(4-methoxyphenyl)oxazole-4-carboxylate (3d):**

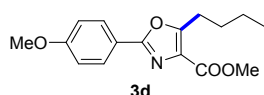

The reaction of 0.3 mmol of methyl 2-(4-methoxyphenyl)oxazole-4-carboxylate (**1d**) and 1.2 mmol of *n*-butylboronic acid (**2a**) afforded 71% of **3d** after flash chromatography on silica gel using petroleum ether and ethyl acetate (20:1 to 15:1, *v/v*) as the effluent. Light yellow solid, m.p. 66-68 °C. **<sup>1</sup>H NMR (CDCl<sub>3</sub>, 400 MHz):**  $\delta$  = 8.01 (d, 2H, *J* = 8.4 Hz), 6.96 (d, 2H, *J* = 8.4 Hz), 3.94 (s, 3H), 3.85 (s, 3H), 3.10 (t, 2H, *J* = 7.2 Hz), 1.73 (p, 2H, *J* = 7.2 Hz), 1.43 (h, 2H, *J* = 7.2 Hz), 0.96 (t, 3H, *J* = 7.2 Hz) ppm; **<sup>13</sup>C NMR (CDCl<sub>3</sub>, 100 MHz):**  $\delta$  = 162.9, 161.6, 159.8, 159.7, 128.2, 127.8, 119.3, 114.0, 55.3, 51.8, 29.8, 25.6, 22.2, 13.6 ppm; **HRMS *m/z* (ESI)** calcd for [C<sub>16</sub>H<sub>19</sub>NO<sub>4</sub>+H]<sup>+</sup> 290.1392, found 290.1385.

**Methyl 5-*n*-Butyl-2-(3-methoxyphenyl)oxazole-4-carboxylate (3e):**

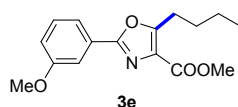

The reaction of 0.3 mmol of methyl 2-(3-methoxyphenyl)oxazole-4-carboxylate (**1e**) and 1.2 mmol of *n*-butylboronic acid (**2a**) afforded 74% of **3d** after flash chromatography on silica gel using petroleum ether and ethyl acetate (12:1 to 10:1, *v/v*) as the effluent. Light yellow solid, m.p. 53-55 °C. **<sup>1</sup>H NMR (CDCl<sub>3</sub>, 400 MHz):**  $\delta$  = 7.66-7.60 (m, 2H), 7.36 (t, 1H, *J* = 8.0 Hz), 7.02-7.00 (m, 1H), 3.95 (s, 3H), 3.88 (s, 3H), 3.12 (t, 2H, *J* = 7.6 Hz), 1.75 (p, 2H, *J* = 7.6 Hz), 1.43 (h, 2H, *J* = 7.6 Hz), 0.97 (t, 3H, *J* = 7.6 Hz) ppm; **<sup>13</sup>C NMR (CDCl<sub>3</sub>, 100 MHz):**  $\delta$  = 162.7, 160.4, 159.8, 159.5, 129.7, 128.0, 127.7, 119.0, 117.3, 111.0, 55.4, 51.9, 29.8, 25.7, 22.2, 13.6 ppm; **HRMS *m/z* (ESI)** calcd for [C<sub>16</sub>H<sub>19</sub>NO<sub>4</sub>+H]<sup>+</sup>

290.1392, found 290.1383.

**Methyl 5-*n*-Butyl-2-(4-trifluoromethylphenyl)oxazole-4-carboxylate (3f):**

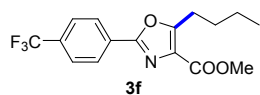

The reaction of 0.3 mmol of methyl 2-(4-trifluoromethylphenyl)oxazole-4-carboxylate (**1f**) and 1.2 mmol of *n*-butylboronic acid (**2a**) afforded 60% of **3e** after flash chromatography on silica gel using petroleum ether and ethyl acetate (20:1, *v/v*) as the effluent. Offwhite solid, m.p. 57-59 °C. **<sup>1</sup>H NMR (CDCl<sub>3</sub>, 400 MHz):** δ = 8.19 (d, 2H, *J* = 8.0 Hz), 7.72 (d, 2H, *J* = 8.0 Hz), 3.96 (s, 3H), 3.14 (t, 2H, *J* = 7.6 Hz), 1.76 (p, 2H, *J* = 7.6 Hz), 1.44 (h, 2H, *J* = 7.6 Hz), 0.98 (t, 3H, *J* = 7.6 Hz) ppm; **<sup>13</sup>C NMR (CDCl<sub>3</sub>, 100 MHz):** δ = 162.5, 161.1, 158.2, 132.3 (q, *J* = 32.6 Hz), 129.7, 128.5, 126.8, 125.8 (d, *J* = 11.1 Hz), 125.7 (d, *J* = 3.7 Hz), 52.1, 29.8, 25.8, 22.2, 13.6 ppm; **HRMS *m/z* (ESI)** calcd for [C<sub>16</sub>H<sub>16</sub>F<sub>3</sub>NO<sub>3</sub>+H]<sup>+</sup> 328.1161, found 328.1155.

**Methyl 5-*n*-Butyl-2-(4-fluorophenyl)oxazole-4-carboxylate (3g):**

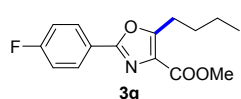

The reaction of 0.3 mmol of methyl 2-(4-fluorophenyl)oxazole-4-carboxylate (**1g**) and 1.2 mmol of *n*-butylboronic acid (**2a**) afforded 75% of **3f** after flash chromatography on silica gel using petroleum ether and ethyl acetate (15:1, *v/v*) as the effluent. Offwhite solid, m.p. 41-42 °C. **<sup>1</sup>H NMR (CDCl<sub>3</sub>, 400 MHz):** δ = 8.08-8.05 (m, 2H), 7.17-7.12 (m, 2H), 3.95 (s, 3H), 3.11 (t, 2H, *J* = 7.6 Hz), 1.74 (p, 2H, *J* = 7.6 Hz), 1.43 (h, 2H, *J* = 7.6 Hz), 0.97 (t, 3H, *J* = 7.6 Hz) ppm; **<sup>13</sup>C NMR (CDCl<sub>3</sub>, 100 MHz):** δ = 164.2 (d, *J* = 250.3 Hz), 162.7, 160.4, 158.8, 128.7 (d, *J* = 8.6 Hz), 128.1, 122.9 (d, *J* = 3.1 Hz), 115.9 (d, *J* = 22.2 Hz), 115.8, 51.9, 29.8, 25.7, 22.2, 13.6 ppm; **HRMS *m/z* (ESI)** calcd for [C<sub>15</sub>H<sub>16</sub>FNO<sub>3</sub>+H]<sup>+</sup> 278.1193, found 278.1189.

**Methyl 5-*n*-Butyl-2-(3-fluorophenyl)oxazole-4-carboxylate (3h):**

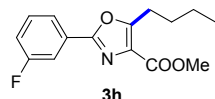

The reaction of 0.3 mmol of methyl 2-(3-fluorophenyl)oxazole-4-carboxylate (**1h**) and 1.2 mmol of *n*-butylboronic acid (**2a**) afforded 68% of **3g** after flash chromatography on silica gel using petroleum ether and ethyl acetate (15:1, *v/v*) as the effluent. Offwhite solid, m.p. 54-56 °C. **<sup>1</sup>H NMR (CDCl<sub>3</sub>, 400 MHz):** δ = 7.87 (t, 1H, *J* = 8.0 Hz), 7.79-7.75 (m, 1H), 7.46-7.40 (m, 1H), 7.19-7.14 (m, 1H), 3.95 (s, 3H), 3.12 (t, 2H, *J* = 7.6 Hz), 1.75 (p,

2H,  $J = 7.6$  Hz), 1.44 (h, 2H,  $J = 7.6$  Hz), 0.97 (t, 3H,  $J = 7.6$  Hz) ppm;  $^{13}\text{C}$  NMR ( $\text{CDCl}_3$ , 100 MHz):  $\delta = 162.8$  (d,  $J = 245.3$  Hz), 162.6, 160.7, 158.4 (d,  $J = 3.6$  Hz), 130.4 (d,  $J = 8.1$  Hz), 128.5 (d,  $J = 8.6$  Hz), 128.2, 122.2 (d,  $J = 3.0$  Hz), 117.7 (d,  $J = 21.2$  Hz), 113.5 (d,  $J = 24.0$  Hz), 52.0, 29.8, 25.7, 22.2, 13.6 ppm; HRMS  $m/z$  (ESI) calcd for  $[\text{C}_{15}\text{H}_{16}\text{FNO}_3 + \text{H}]^+$  278.1193, found 278.1188.

**Methyl 5-*n*-Butyl-2-(2-fluorophenyl)oxazole-4-carboxylate (3i):**

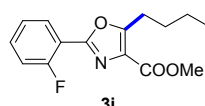

The reaction of 0.3 mmol of methyl 2-(2-fluorophenyl)oxazole-4-carboxylate (**1i**) and 1.2 mmol of *n*-butylboronic acid (**2a**) afforded 72% of **3h** after flash chromatography on silica gel using petroleum ether and ethyl acetate (15:1, *v/v*) as the effluent. Offwhite solid, m.p. 36-37 °C.  $^1\text{H}$  NMR ( $\text{CDCl}_3$ , 400 MHz):  $\delta = 8.08$  (t, 1H,  $J = 7.6$  Hz), 7.48-7.42 (m, 1H), 7.26-7.17 (m, 2H), 3.95 (s, 3H), 3.14 (t, 2H,  $J = 7.6$  Hz), 1.75 (p, 2H,  $J = 7.6$  Hz), 1.43 (h, 2H,  $J = 7.6$  Hz), 0.97 (t, 3H,  $J = 7.6$  Hz) ppm;  $^{13}\text{C}$  NMR ( $\text{CDCl}_3$ , 100 MHz):  $\delta = 162.7$ , 160.7 (d,  $J = 1.3$  Hz), 160.0 (d,  $J = 255.8$  Hz), 156.2 (d,  $J = 4.3$  Hz), 132.4 (d,  $J = 8.5$  Hz), 129.8 (d,  $J = 1.3$  Hz), 128.0, 124.2 (d,  $J = 3.7$  Hz), 116.7 (d,  $J = 21.1$  Hz), 114.9 (d,  $J = 11.0$  Hz), 51.9, 29.7, 25.7, 22.2, 13.6 ppm; HRMS  $m/z$  (ESI) calcd for  $[\text{C}_{15}\text{H}_{16}\text{FNO}_3 + \text{H}]^+$  278.1193, found 278.1186.

**Methyl 5-*n*-Butyl-2-(4-chlorophenyl)oxazole-4-carboxylate (3j):**

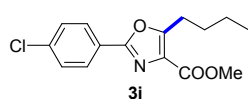

The reaction of 0.3 mmol of methyl 2-(4-chlorophenyl)oxazole-4-carboxylate (**1j**) and 1.2 mmol of *n*-butylboronic acid (**2a**) afforded 69% of **3i** after flash chromatography on silica gel using petroleum ether and ethyl acetate (15:1, *v/v*) as the effluent. Light yellow solid, m.p. 71-73 °C.  $^1\text{H}$  NMR ( $\text{CDCl}_3$ , 400 MHz):  $\delta = 8.01$  (d, 2H,  $J = 8.8$  Hz), 7.43 (d, 2H,  $J = 8.8$  Hz), 3.95 (s, 3H), 3.11 (t, 2H,  $J = 7.6$  Hz), 1.74 (p, 2H,  $J = 7.6$  Hz), 1.43 (h, 2H,  $J = 7.6$  Hz), 0.97 (t, 3H,  $J = 7.6$  Hz) ppm;  $^{13}\text{C}$  NMR ( $\text{CDCl}_3$ , 100 MHz):  $\delta = 162.6$ , 160.5, 158.7, 136.9, 129.0, 128.2, 127.8, 125.1, 52.0, 29.8, 25.7, 22.2, 13.6 ppm; HRMS  $m/z$  (ESI) calcd for  $[\text{C}_{15}\text{H}_{16}\text{ClNO}_3 + \text{H}]^+$  294.0891, found 294.0887.

**Methyl 5-*n*-Butyl-2-(4-bromophenyl)oxazole-4-carboxylate (3k):**

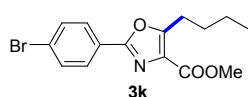

The reaction of 0.3 mmol of methyl 2-(4-bromophenyl)oxazole-4-

carboxylate (**1k**) and 1.2 mmol of *n*-butylboronic acid (**2a**) afforded 62% of **3j** after flash chromatography on silica gel using petroleum ether and ethyl acetate (15:1, v/v) as the effluent. Light yellow solid, m.p. 62-63 °C. <sup>1</sup>H NMR (CDCl<sub>3</sub>, 400 MHz): δ = 7.94 (d, 2H, *J* = 8.4 Hz), 7.59 (d, 2H, *J* = 8.4 Hz), 3.95 (s, 3H), 3.11 (t, 2H, *J* = 7.6 Hz), 1.74 (p, 2H, *J* = 7.6 Hz), 1.43 (h, 2H, *J* = 7.6 Hz), 0.97 (t, 3H, *J* = 7.6 Hz) ppm; <sup>13</sup>C NMR (CDCl<sub>3</sub>, 100 MHz): δ = 162.6, 160.6, 158.7, 132.0, 128.2, 127.9, 125.5, 125.3, 52.0, 29.8, 25.7, 22.2, 13.6 ppm; HRMS *m/z* (ESI) calcd for [C<sub>15</sub>H<sub>16</sub>BrNO<sub>3</sub>+H]<sup>+</sup> 338.0392, found 338.0385.

**Methyl 5-*n*-Butyl-2-*n*-propyloxazole-4-carboxylate (**3l**):**

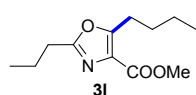

The reaction of 0.3 mmol of methyl 2-*n*-propyloxazole-4-carboxylate (**1l**) and 1.2 mmol of *n*-butylboronic acid (**2a**) afforded 65% of **3l** after flash chromatography on silica gel using petroleum ether and ethyl acetate (50:1, v/v) as the effluent. Colorless oil. <sup>1</sup>H NMR (CDCl<sub>3</sub>, 400 MHz): δ = 3.89 (s, 3H), 3.01 (t, 2H, *J* = 7.6 Hz), 2.72 (t, 2H, *J* = 7.6 Hz), 1.79 (q, 2H, *J* = 7.6 Hz), 1.66 (p, 2H, *J* = 7.6 Hz), 1.37 (h, 2H, *J* = 7.6 Hz), 0.98 (t, 3H, *J* = 7.6 Hz), 0.94 (t, 3H, *J* = 7.6 Hz) ppm; <sup>13</sup>C NMR (CDCl<sub>3</sub>, 100 MHz): δ = 162.9, 160.0, 143.6, 126.6, 51.7, 29.8, 29.7, 25.5, 22.1, 20.4, 13.6, 13.6 ppm; HRMS *m/z* (ESI) calcd for [C<sub>12</sub>H<sub>19</sub>NO<sub>3</sub>+Na]<sup>+</sup> 248.1263, found 248.1263.

***N*-Ethyl 5-*n*-Butyl-2-phenyloxazole-4-formamide (**3m**):**

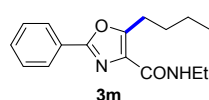

The reaction of 0.3 mmol of *N*-ethyl 2-phenyloxazole-4-formamide (**1m**) and 1.2 mmol of *n*-butylboronic acid (**2a**) afforded 70% of **3m** after flash chromatography on silica gel using petroleum ether and ethyl acetate (12:1, v/v) as the effluent. Yellow solid, m.p. 55-57 °C. <sup>1</sup>H NMR (CDCl<sub>3</sub>, 400 MHz): δ = 8.02-7.99 (m, 2H), 7.47-7.44 (m, 3H), 7.09 (s, 1H), 3.50-3.44 (m, 2H), 3.16 (t, 2H, *J* = 7.6 Hz), 1.74 (p, 2H, *J* = 7.6 Hz), 1.44 (h, 2H, *J* = 7.6 Hz), 1.26 (t, 3H, *J* = 7.2 Hz), 0.96 (t, 3H, *J* = 7.6 Hz) ppm; <sup>13</sup>C NMR (CDCl<sub>3</sub>, 100 MHz): δ = 161.8, 158.4, 156.7, 130.4, 129.9, 128.7, 126.9, 126.2, 33.7, 30.0, 25.5, 22.3, 14.9, 13.7 ppm; HRMS *m/z* (ESI) calcd for [C<sub>16</sub>H<sub>20</sub>N<sub>2</sub>O<sub>2</sub>+H]<sup>+</sup> 273.1603, found 273.1598.

***N*-*n*-Butyl 5-*n*-Butyl-2-phenyloxazole-4-formamide (**3n**):**

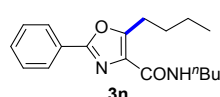

The reaction of 0.3 mmol of *N*-*n*-butyl 2-phenyloxazole-4-formamide (**1n**)

and 1.2 mmol of *n*-butylboronic acid (**2a**) afforded 69% of **3n** after flash chromatography on silica gel using petroleum ether and ethyl acetate (10:1, v/v) as the effluent. Light yellow oil. **<sup>1</sup>H NMR (CDCl<sub>3</sub>, 400 MHz):** δ = 8.02-7.99 (m, 2H), 7.46-7.44 (m, 3H), 7.13-7.11 (m, 1H), 3.42 (q, 2H, *J* = 7.2 Hz), 3.16 (t, 2H, *J* = 7.6 Hz), 1.74 (p, 2H, *J* = 7.6 Hz), 1.61 (p, 2H, *J* = 7.2 Hz), 1.46-1.40 (m, 4H), 0.98-0.94 (m, 6H) ppm; **<sup>13</sup>C NMR (CDCl<sub>3</sub>, 100 MHz):** δ = 161.9, 158.4, 156.7, 130.4, 130.0, 128.7, 126.9, 126.2, 38.6, 31.8, 30.0, 25.5, 22.3, 20.1, 13.7, 13.7 ppm; **HRMS *m/z* (ESI)** calcd for [C<sub>18</sub>H<sub>24</sub>N<sub>2</sub>O<sub>2</sub>+H]<sup>+</sup> 301.1916, found 301.1909.

***N*-Cyclohexyl 5-*n*-Butyl-2-phenyloxazole-4-formamide (**3o**):**

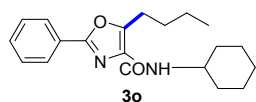

The reaction of 0.3 mmol of *N*-cyclohexyl 2-phenyloxazole-4-formamide (**1o**) and 1.2 mmol of *n*-butylboronic acid (**2a**) afforded 63% of **3o** after flash chromatography on silica gel using petroleum ether and ethyl acetate (15:1, v/v) as the effluent. Light yellow oil. **<sup>1</sup>H NMR (CDCl<sub>3</sub>, 400 MHz):** δ = 8.02-8.00 (m, 2H), 7.47-7.45 (m, 3H), 7.00-6.98 (m, 1H), 3.97-3.90 (m, 1H), 3.16 (t, 2H, *J* = 7.6 Hz), 2.04-2.00 (m, 2H), 1.79-1.64 (m, 4H), 1.46-1.20 (m, 8H), 0.96 (t, 3H, *J* = 7.6 Hz) ppm; **<sup>13</sup>C NMR (CDCl<sub>3</sub>, 100 MHz):** δ = 161.0, 158.3, 156.7, 130.4, 130.0, 128.7, 126.9, 126.2, 47.7, 33.2, 30.0, 25.5, 25.5, 24.9, 22.3, 13.7 ppm; **HRMS *m/z* (ESI)** calcd for [C<sub>20</sub>H<sub>26</sub>N<sub>2</sub>O<sub>2</sub>+H]<sup>+</sup> 327.2073, found 327.2066.

***N,N*-Diethyl 5-*n*-Butyl-2-phenyloxazole-4-formamide (**3p**):**

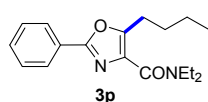

The reaction of 0.3 mmol of *N,N*-diethyl 2-phenyloxazole-4-formamide (**1p**) and 1.2 mmol of *n*-butylboronic acid (**2a**) afforded 45% of **3p** after flash chromatography on silica gel using petroleum ether and ethyl acetate (15:1, v/v) as the effluent. Light yellow oil. **<sup>1</sup>H NMR (CDCl<sub>3</sub>, 400 MHz):** δ = 8.01-7.99 (m, 2H), 7.47-7.43 (m, 3H), 3.74 (q, 2H, *J* = 6.8 Hz), 3.52 (q, 2H, *J* = 6.8 Hz), 3.01 (t, 2H, *J* = 7.6 Hz), 1.73 (p, 2H, *J* = 7.6 Hz), 1.42 (h, 2H, *J* = 7.6 Hz), 1.32-1.23 (m, 6H), 0.95 (t, 3H, *J* = 7.6 Hz) ppm; **<sup>13</sup>C NMR (CDCl<sub>3</sub>, 100 MHz):** δ = 163.0, 157.8, 157.1, 131.7, 130.1, 128.7, 127.4, 126.1, 43.1, 40.6, 30.1, 25.7, 22.3, 14.6, 13.7, 12.9 ppm; **HRMS *m/z* (ESI)** calcd for [C<sub>18</sub>H<sub>24</sub>N<sub>2</sub>O<sub>2</sub>+H]<sup>+</sup> 301.1916, found 301.1910.

***N,N*-Diethyl 5-*n*-Butyl-2,4-diphenyloxazole (**3q**):**

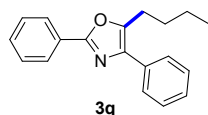

The reaction of 0.3 mmol of *N,N*-diethyl 2,4-diphenyloxazole (**1q**) and 1.2 mmol of *n*-butylboronic acid (**2a**) afforded 45% of **3q** after flash chromatography on silica gel using petroleum ether and ethyl acetate (15:1, v/v) as the effluent. Light yellow oil.

mmol of *n*-butylboronic acid (**2a**) afforded 78% of **3q** after flash chromatography on silica gel using petroleum ether and ethyl acetate (50:1, *v/v*) as the effluent. Light yellow oil. **<sup>1</sup>H NMR** (**CDCl<sub>3</sub>**, **400 MHz**): δ = 8.10-8.07 (m, 2H), 7.73-7.71 (m, 2H) 7.47-7.40 (m, 6H), 2.94 (t, 2H, *J* = 7.6 Hz), 1.78 (p, 2H, *J* = 7.6 Hz), 1.46 (h, 2H, *J* = 7.6 Hz), 0.96 (t, 3H, *J* = 7.6 Hz) ppm; **<sup>13</sup>C NMR** (**CDCl<sub>3</sub>**, **100 MHz**): δ = 159.4, 148.2, 135.8, 132.5, 129.9, 128.6, 128.6, 127.7, 127.3, 127.0, 126.1, 30.4, 25.7, 22.4, 13.8 ppm; **HRMS** *m/z* (ESI) calcd for [C<sub>19</sub>H<sub>19</sub>NO+H]<sup>+</sup> 278.1545, found 278.1543.

**Methyl 5-Ethyl-2-phenyloxazole-4-carboxylate (3r):**

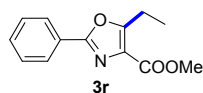

The reaction of 0.3 mmol of methyl 2-phenyloxazole-4-carboxylate (**1a**) and 1.2 mmol of ethylboronic acid (**2b**) afforded 70% of **3r** after flash chromatography on silica gel using petroleum ether and ethyl acetate (20:1, *v/v*) as the effluent. Offwhite solid, m.p. 72-73 °C. **<sup>1</sup>H NMR** (**CDCl<sub>3</sub>**, **400 MHz**): δ = 8.09-8.07 (m, 2H), 7.47-7.44 (m, 3H), 3.95 (s, 3H), 3.15 (q, 2H, *J* = 7.6 Hz), 1.35 (t, 3H, *J* = 7.6 Hz) ppm; **<sup>13</sup>C NMR** (**CDCl<sub>3</sub>**, **100 MHz**): δ = 162.8, 161.2, 159.6, 130.7, 128.7, 127.6, 126.6, 126.5, 51.9, 19.7, 12.1 ppm; **HRMS** *m/z* (ESI) calcd for [C<sub>13</sub>H<sub>13</sub>NO<sub>3</sub>+H]<sup>+</sup> 232.0974, found 232.0965.

**Methyl 5-*n*-Propyl-2-phenyloxazole-4-carboxylate (3s):**

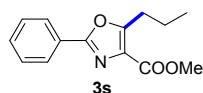

The reaction of 0.3 mmol of methyl 2-phenyloxazole-4-carboxylate (**1a**) and 1.2 mmol of *n*-propylboronic acid (**2c**) afforded 73% of **3s** after flash chromatography on silica gel using petroleum ether and ethyl acetate (15:1, *v/v*) as the effluent. Colorless oil. **<sup>1</sup>H NMR** (**CDCl<sub>3</sub>**, **400 MHz**): δ = 8.09-8.07 (m, 2H), 7.46-7.45 (m, 3H), 3.95 (s, 3H), 3.10 (t, 2H, *J* = 7.6 Hz), 1.80 (h, 2H, *J* = 7.6 Hz), 1.03 (t, 3H, *J* = 7.6 Hz) ppm; **<sup>13</sup>C NMR** (**CDCl<sub>3</sub>**, **100 MHz**): δ = 162.8, 160.1, 159.6, 130.7, 128.7, 128.2, 126.6, 126.5, 51.9, 27.8, 21.2, 13.6 ppm; **HRMS** *m/z* (ESI) calcd for [C<sub>14</sub>H<sub>15</sub>NO<sub>3</sub>+H]<sup>+</sup> 246.1130, found 246.1125.

**Methyl 5-*n*-Pentyl-2-phenyloxazole-4-carboxylate (3t):**

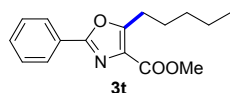

The reaction of 0.3 mmol of methyl 2-phenyloxazole-4-carboxylate (**1a**) and 1.2 mmol of *n*-pentylboronic acid (**2d**) afforded 77% of **3t** after flash chromatography on silica gel using petroleum ether and ethyl acetate (15:1, *v/v*) as the effluent.

Colorless oil. **<sup>1</sup>H NMR (CDCl<sub>3</sub>, 400 MHz):** δ = 8.09-8.07 (m, 2H), 7.47-7.44 (m, 3H), 3.95 (s, 3H), 3.11 (t, 2H, *J* = 7.6 Hz), 1.76 (p, 2H, *J* = 7.6 Hz), 1.40-1.37 (m, 4H), 0.91 (t, 3H, *J* = 7.6 Hz) ppm; **<sup>13</sup>C NMR (CDCl<sub>3</sub>, 100 MHz):** δ = 162.8, 160.4, 159.6, 130.7, 128.7, 128.0, 126.6, 126.5, 51.9, 31.2, 27.4, 25.9, 22.2, 13.8 ppm; **HRMS *m/z* (ESI)** calcd for [C<sub>16</sub>H<sub>19</sub>NO<sub>3</sub>+H]<sup>+</sup> 274.1443, found 274.1437.

**Methyl 5-*n*-Hexyl-2-phenyloxazole-4-carboxylate (3u):**

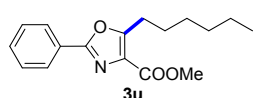

The reaction of 0.3 mmol of methyl 2-phenyloxazole-4-carboxylate (**1a**) and 1.2 mmol of *n*-hexylboronic acid (**2e**) afforded 68% of **3u** after flash chromatography on silica gel using petroleum ether and ethyl acetate (15:1, *v/v*) as the effluent. Colorless oil. **<sup>1</sup>H NMR (CDCl<sub>3</sub>, 400 MHz):** δ = 8.09-8.07 (m, 2H), 7.47-7.45 (m, 3H), 3.95 (s, 3H), 3.11 (t, 2H, *J* = 7.6 Hz), 1.76 (p, 2H, *J* = 7.6 Hz), 1.42-1.31 (m, 6H), 0.89 (t, 3H, *J* = 7.6 Hz) ppm; **<sup>13</sup>C NMR (CDCl<sub>3</sub>, 100 MHz):** δ = 162.8, 160.4, 159.6, 130.7, 128.7, 128.0, 126.6, 126.5, 51.9, 31.3, 28.7, 27.7, 26.0, 22.4, 14.0 ppm; **HRMS *m/z* (ESI)** calcd for [C<sub>17</sub>H<sub>21</sub>NO<sub>3</sub>+H]<sup>+</sup> 288.1600, found 288.1593.

**Methyl 5-(2-Phenylethyl)-2-phenyloxazole-4-carboxylate (3v):**

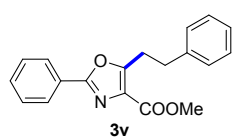

The reaction of 0.3 mmol of methyl 2-phenyloxazole-4-carboxylate (**1a**) and 1.2 mmol of 2-phenylethylboronic acid (**2f**) afforded 72% of **3v** after flash chromatography on silica gel using petroleum ether and ethyl acetate (20:1, *v/v*) as the effluent. Light yellow solid, m.p. 65-67 °C. **<sup>1</sup>H NMR (CDCl<sub>3</sub>, 400 MHz):** δ = 8.05-8.03 (m, 2H), 7.46-7.44 (m, 3H), 7.31-7.21 (m, 5H), 3.92 (s, 3H), 3.43 (t, 2H, *J* = 8.0 Hz), 3.07 (t, 2H, *J* = 8.0 Hz) ppm; **<sup>13</sup>C NMR (CDCl<sub>3</sub>, 100 MHz):** δ = 162.6, 159.8, 159.0, 140.0, 130.8, 128.7, 128.5, 128.3, 126.6, 126.5, 126.4, 52.0, 34.0, 28.0 ppm; **HRMS *m/z* (ESI)** calcd for [C<sub>19</sub>H<sub>17</sub>NO<sub>3</sub>+H]<sup>+</sup> 308.1281, found 308.1278.

**Methyl 5-(2-Methylpropyl)-2-phenyloxazole-4-carboxylate (3w):**

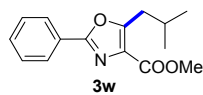

The reaction of 0.3 mmol of methyl 2-phenyloxazole-4-carboxylate (**1a**) and 1.2 mmol of 2-methylpropylboronic acid (**2g**) afforded 64% of **3w** after flash chromatography on silica gel using petroleum ether and ethyl acetate (20:1, *v/v*) as the effluent.

Light yellow solid, m.p. 38-39 °C. **<sup>1</sup>H NMR (CDCl<sub>3</sub>, 400 MHz):** δ = 8.09-8.07 (m, 2H), 7.48-7.44 (m, 3H), 3.95 (s, 3H), 3.01 (d, 2H, *J* = 6.8 Hz), 2.21-2.11 (m, 1H), 1.01 (t, 6H, *J* = 6.8 Hz) ppm; **<sup>13</sup>C NMR (CDCl<sub>3</sub>, 100 MHz):** δ = 162.8, 159.7, 159.5, 130.7, 128.8, 128.7, 126.6, 126.5, 51.9, 34.6, 28.1, 22.3 ppm; **HRMS *m/z* (ESI)** calcd for [C<sub>15</sub>H<sub>17</sub>NO<sub>3</sub>+H]<sup>+</sup> 260.1287, found 260.1283.

**Methyl 5-*i*-Propyl-2-phenyloxazole-4-carboxylate (3x):**

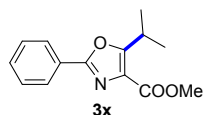

The reaction of 0.3 mmol of methyl 2-phenyloxazole-4-carboxylate (**1a**) and 1.2 mmol of *i*-propylboronic acid (**2h**) afforded 83% of **3x** after flash chromatography on silica gel using petroleum ether and ethyl acetate (20:1, v/v) as the effluent. Offwhite solid, m.p. 48-50 °C. **<sup>1</sup>H NMR (CDCl<sub>3</sub>, 400 MHz):** δ = 8.09-8.07 (m, 2H), 7.48-7.44 (m, 3H), 3.95 (s, 3H), 3.86 (sept, 1H, *J* = 7.2 Hz), 1.37 (d, 6H, *J* = 7.2 Hz) ppm; **<sup>13</sup>C NMR (CDCl<sub>3</sub>, 100 MHz):** δ = 164.3, 162.7, 159.3, 130.6, 128.6, 126.6, 126.5, 126.5, 51.9, 26.1, 20.6 ppm; **HRMS *m/z* (ESI)** calcd for [C<sub>14</sub>H<sub>15</sub>NO<sub>3</sub>+H]<sup>+</sup> 246.1130, found 246.1125.

**Methyl 5-Cyclohexyl-2-phenyloxazole-4-carboxylate (3y):**

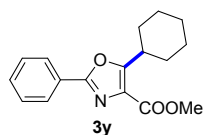

The reaction of 0.3 mmol of methyl 2-phenyloxazole-4-carboxylate (**1a**) and 1.2 mmol of cyclohexylboronic acid (**2i**) afforded 40% of **3y** after flash chromatography on silica gel using petroleum ether and ethyl acetate (15:1, v/v) as the effluent. Light yellow solid, m.p. 107-108 °C. **<sup>1</sup>H NMR (CDCl<sub>3</sub>, 400 MHz):** δ = 8.09-8.06 (m, 2H), 7.46-7.45 (m, 3H), 3.95 (s, 3H), 3.57-3.49 (m, 1H), 1.96-1.61 (m, 6H), 1.50-1.20 (m, 4H) ppm; **<sup>13</sup>C NMR (CDCl<sub>3</sub>, 100 MHz):** δ = 164.0, 162.9, 159.3, 130.7, 128.7, 126.7, 126.7, 126.5, 51.9, 35.6, 30.8, 25.9, 25.7 ppm; **HRMS *m/z* (ESI)** calcd for [C<sub>17</sub>H<sub>19</sub>NO<sub>3</sub>+H]<sup>+</sup> 286.1443, found 286.1438.

# Electronic Supplementary Information

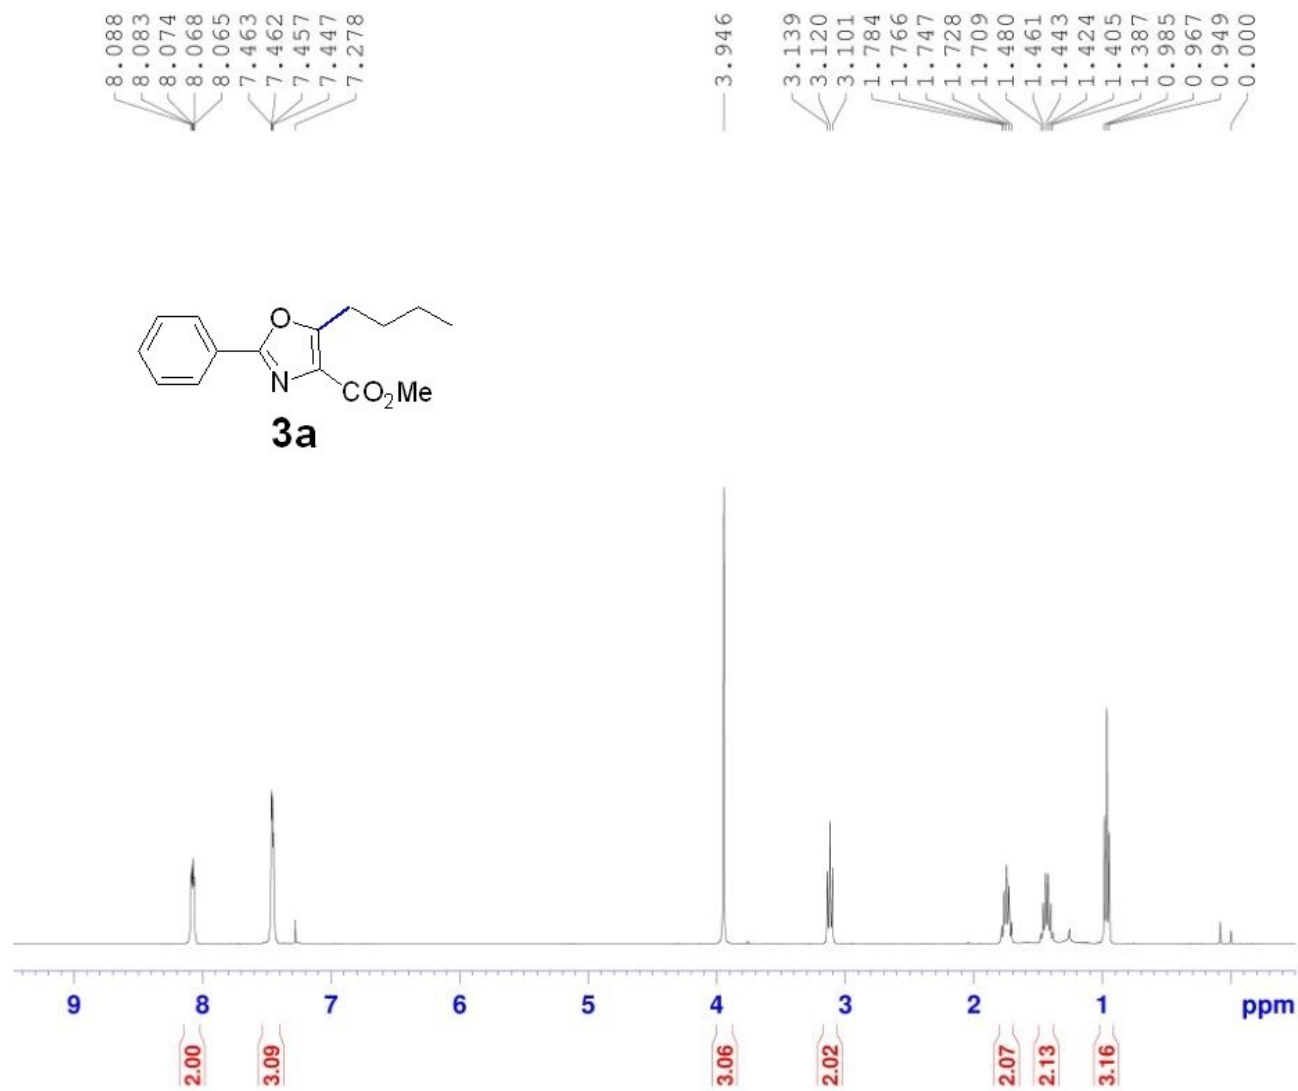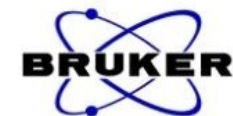

```

NAME      CLJ-YHY-L001
EXPNO     1
PROCNO    1
Date_     20170224
Time      10.40
INSTRUM   spect
PROBHD    5 mm PABBO BB/
PULPROG   zg30
TD         65536
SOLVENT   CDCl3
NS         16
DS         2
SWH        8012.820 Hz
FIDRES     0.122266 Hz
AQ         4.0894966 sec
RG         32.77
DW         62.400 use
DE         6.50 use
TE         298.0 K
D1         1.00000000 sec
TD0        1
  
```

```

===== CHANNEL f1 =====
SF01      400.1324710 MHz
NUC1       1H
P1         8.04 use
SI         65536
SF         400.1300021 MHz
WDW        EM
SSB        0
LB         0.30 Hz
GB         0
PC         1.00
  
```

# Electronic Supplementary Information

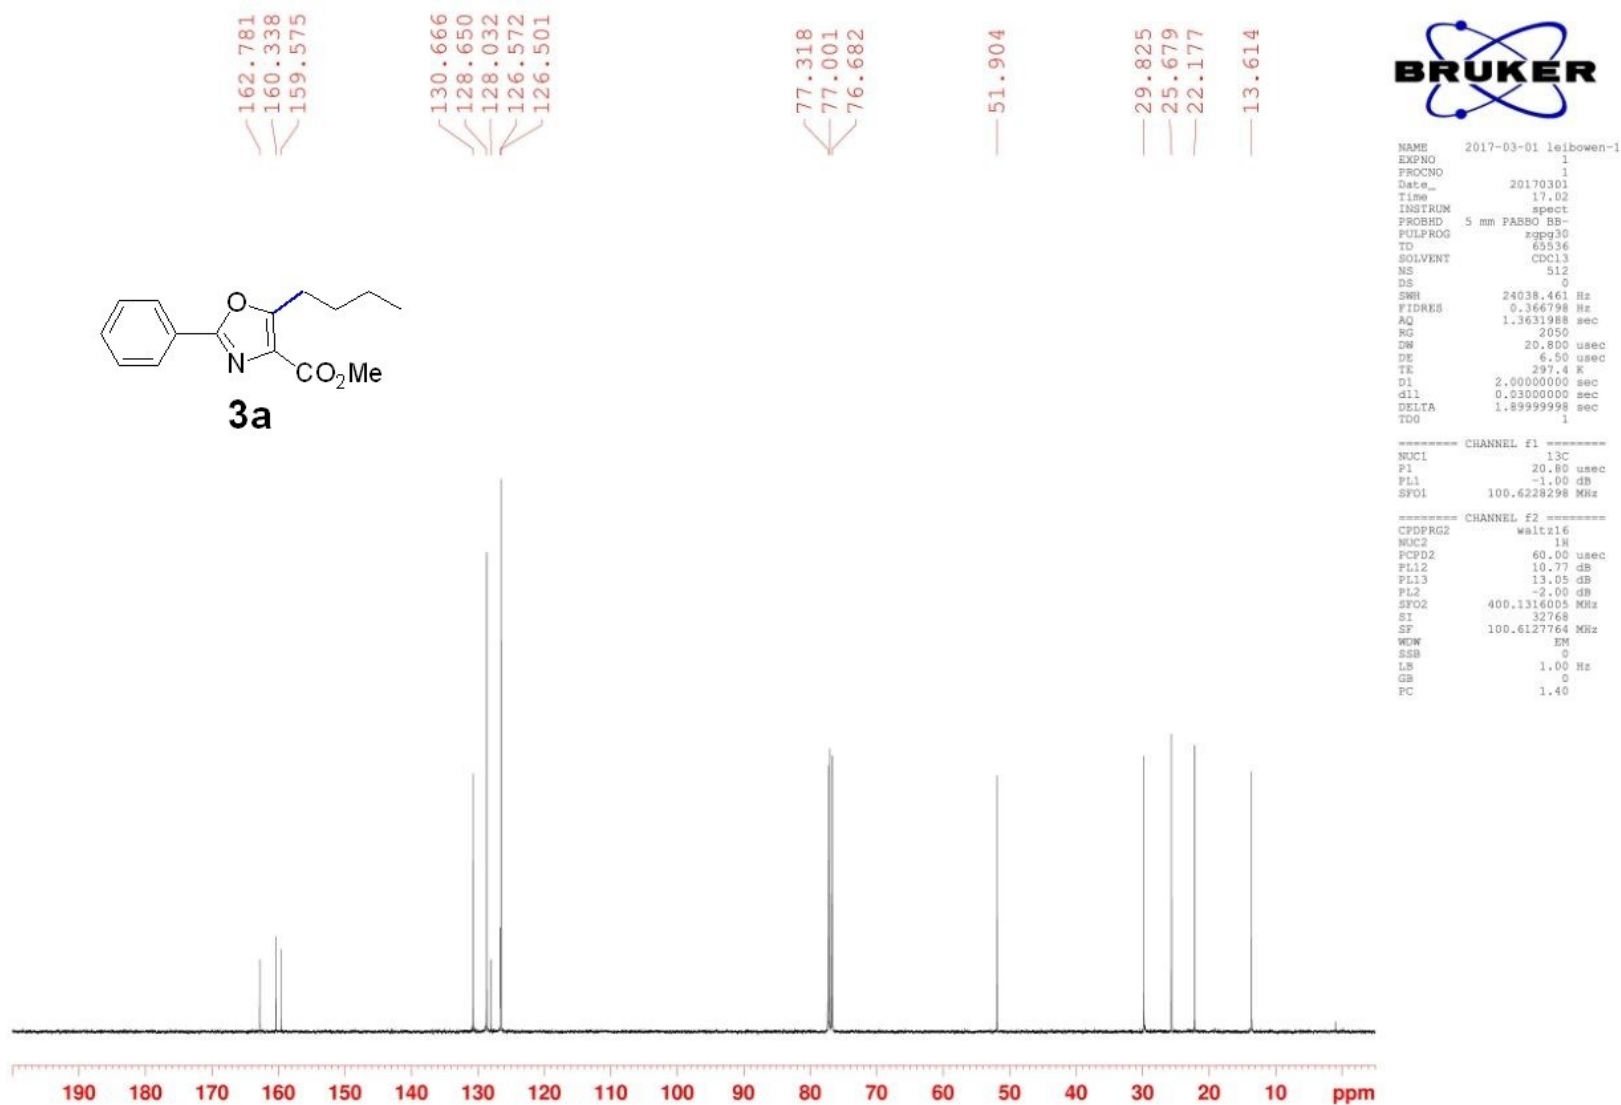

# Electronic Supplementary Information

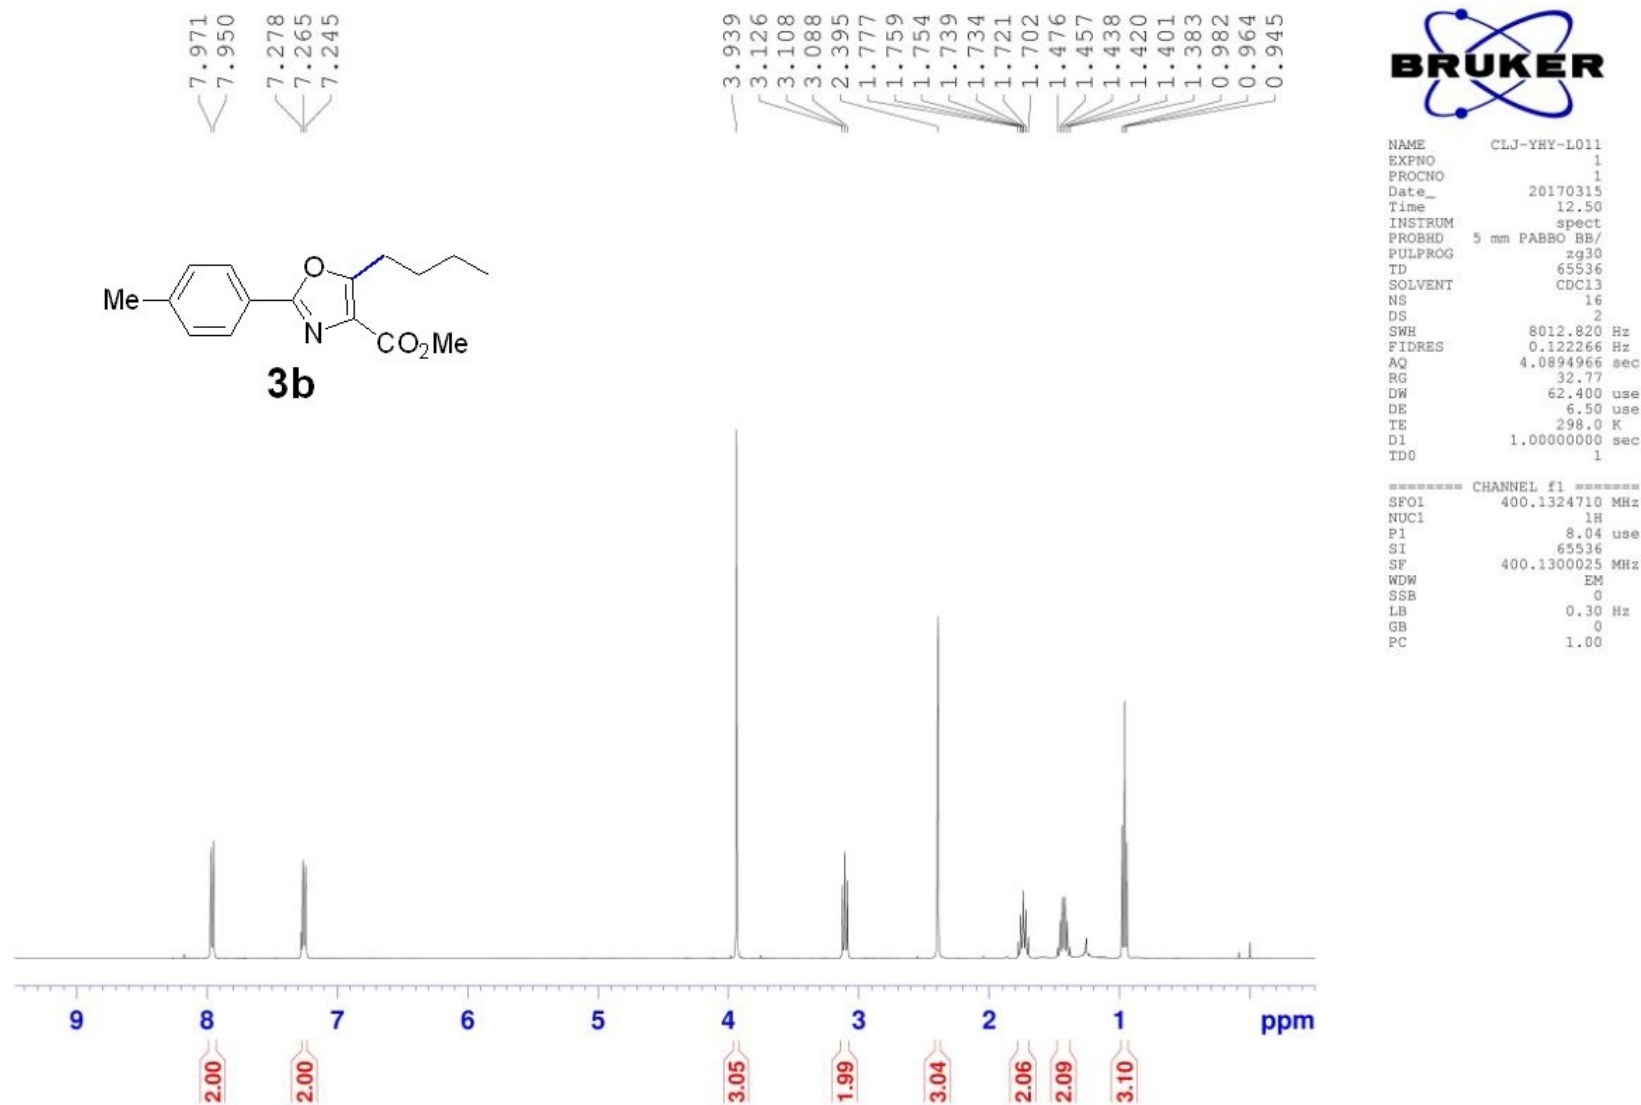

# Electronic Supplementary Information

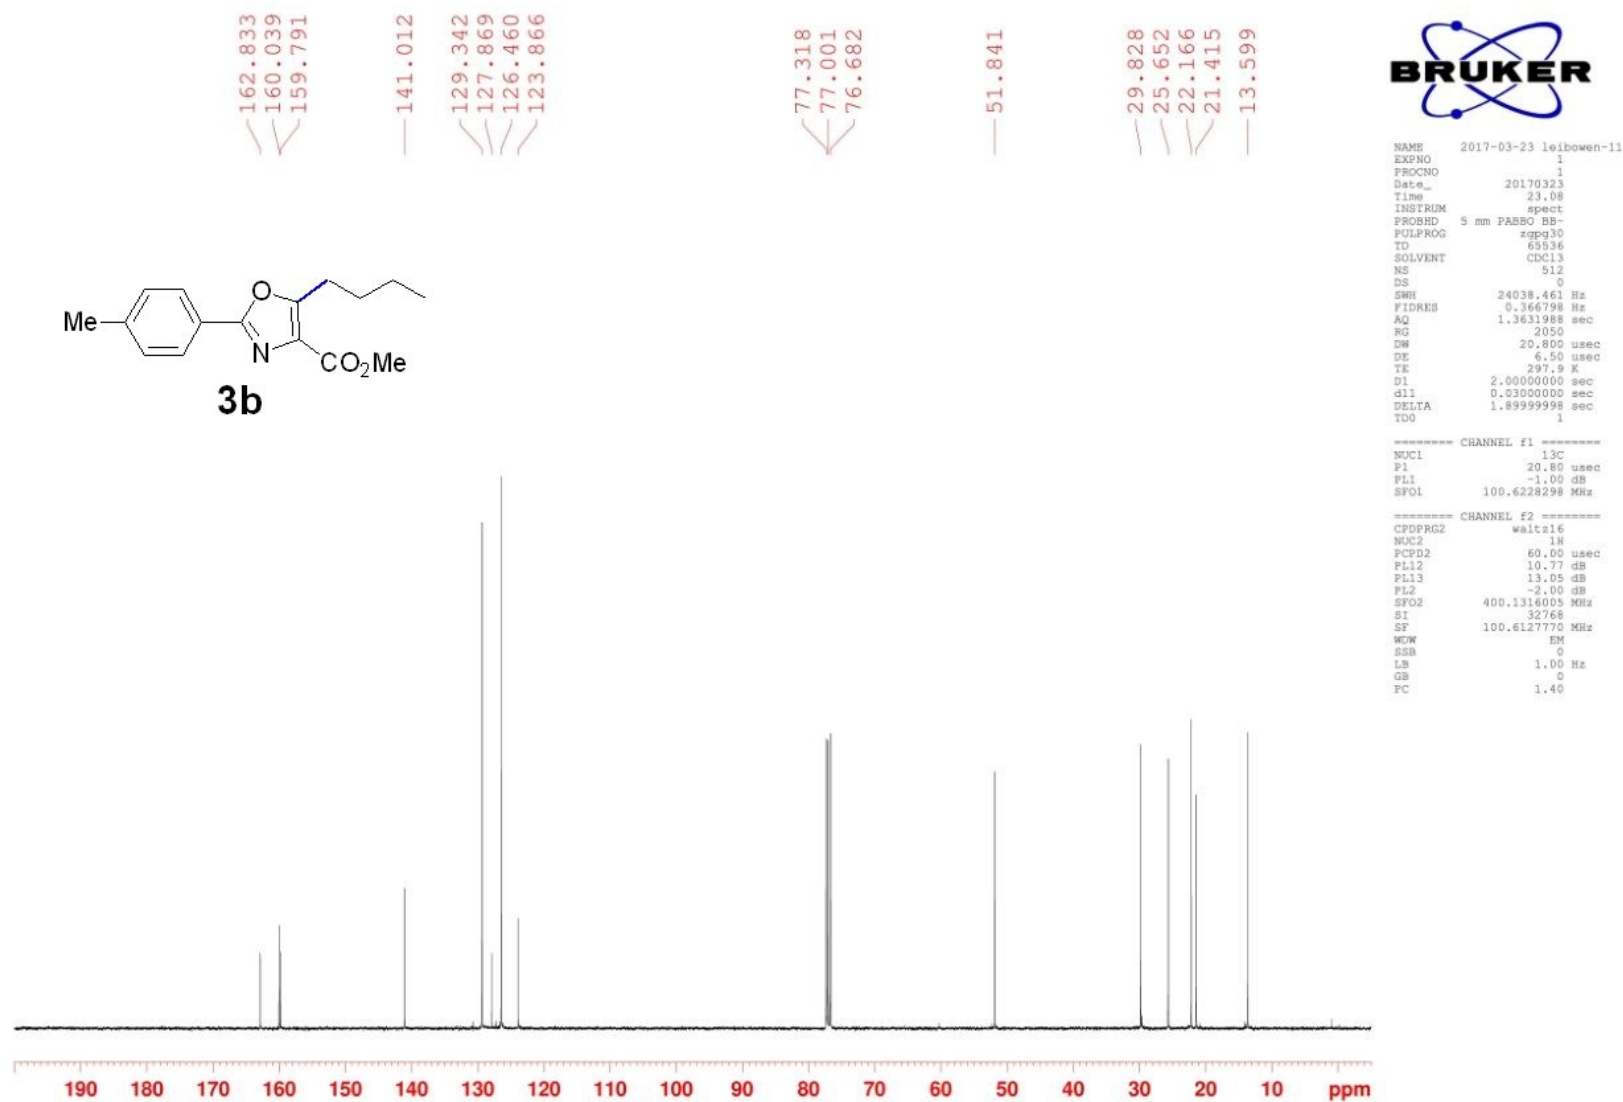

# Electronic Supplementary Information

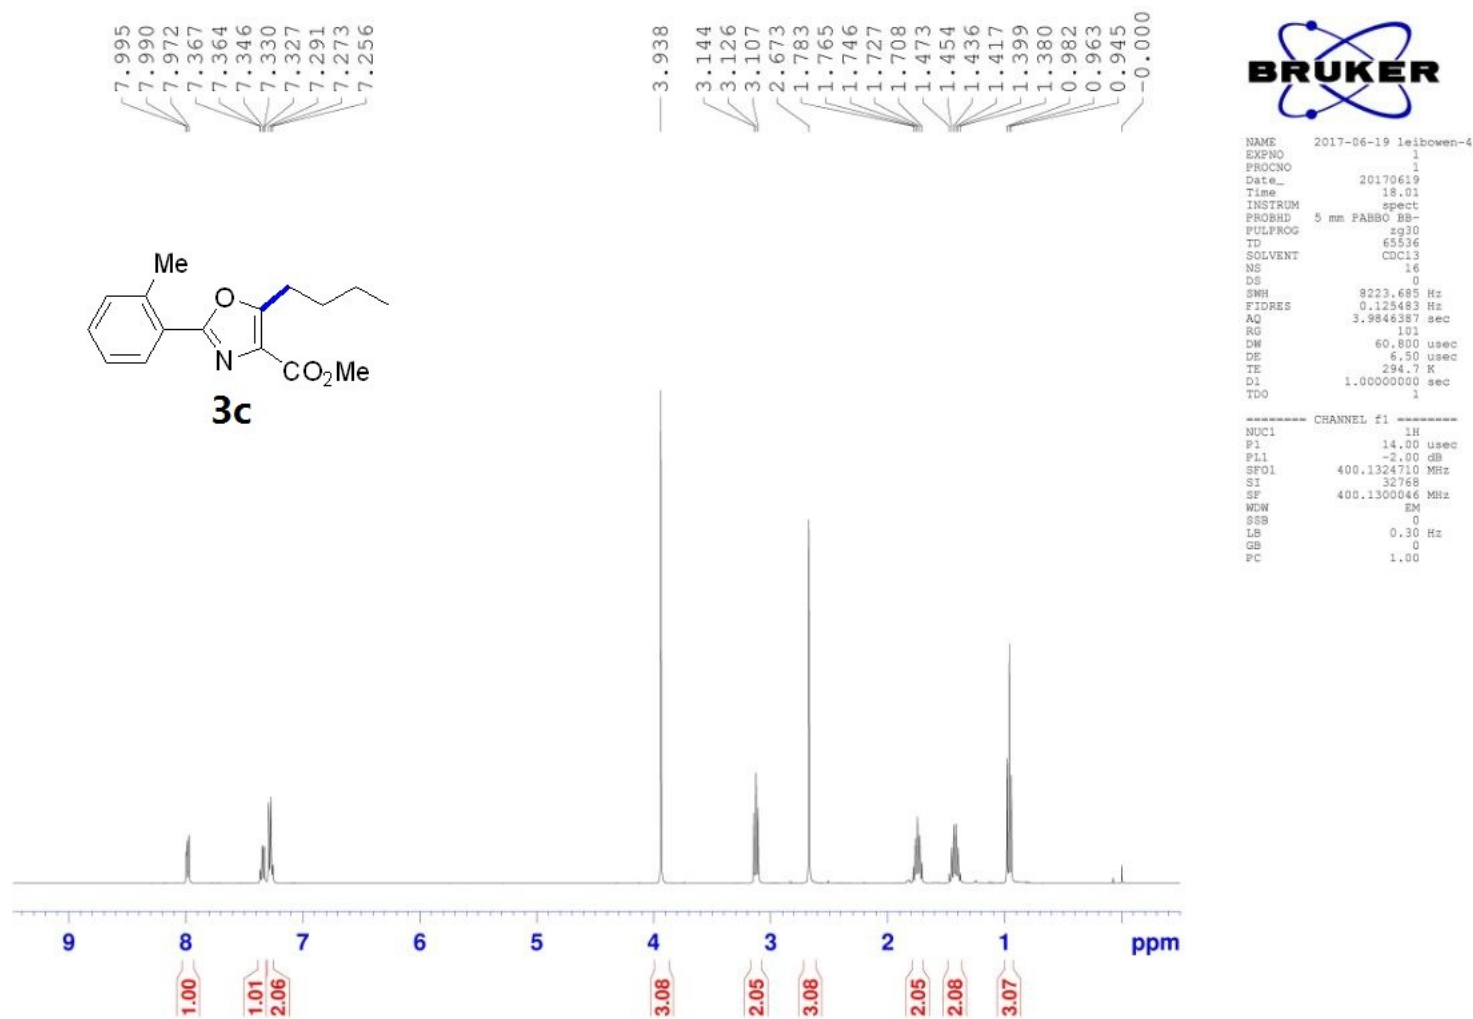

# Electronic Supplementary Information

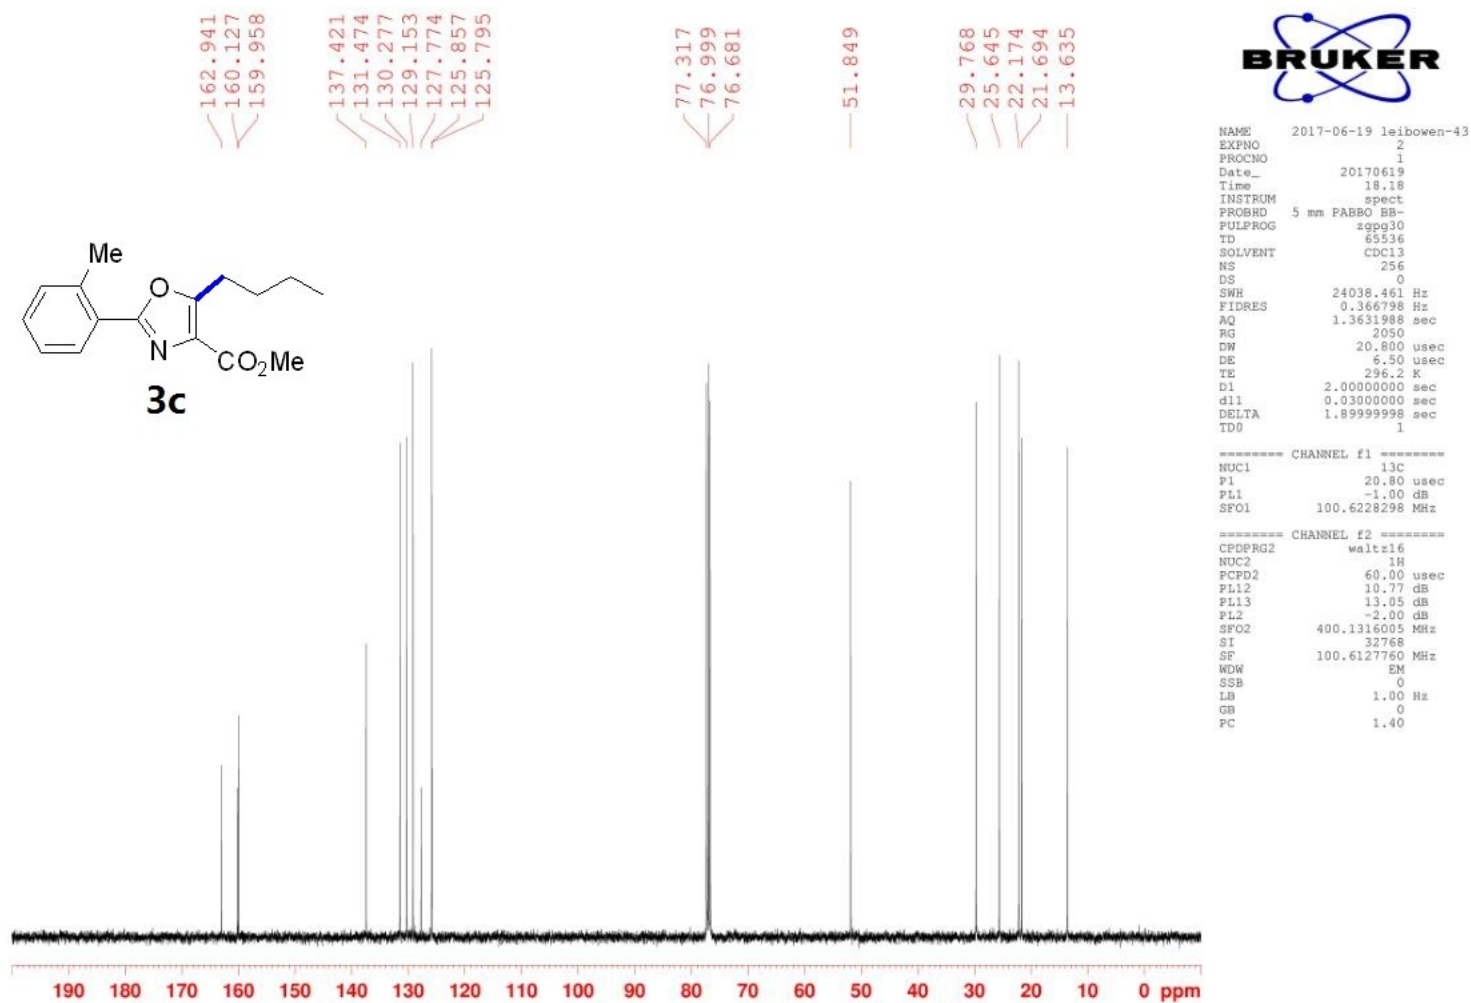

# Electronic Supplementary Information

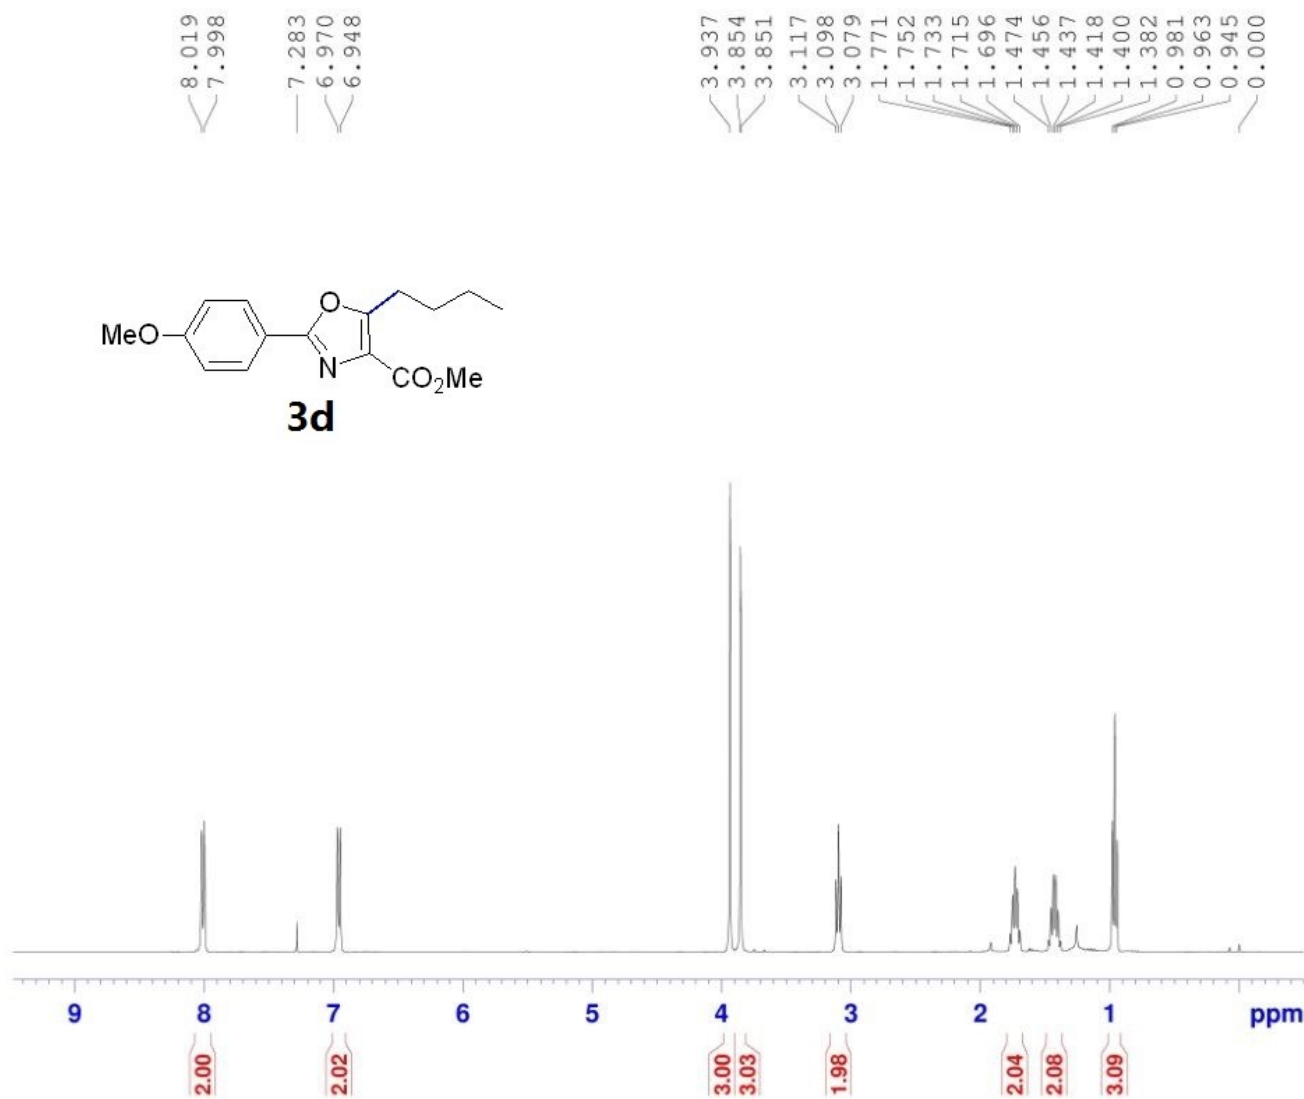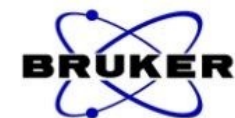

```

NAME      CLJ-YHY-L004
EXPNO     1
PROCNO    1
Date_     20170224
Time      10.52
INSTRUM   spect
PROBHD    5 mm PABBO BB/
PULPROG   zg30
TD        65536
SOLVENT   CDCl3
NS        16
DS        2
SWH       8012.820 Hz
FIDRES    0.122266 Hz
AQ        4.0894966 sec
RG        32.77
DW        62.400 use
DE        6.50 use
TE        298.0 K
D1        1.00000000 sec
TD0       1
  
```

```

===== CHANNEL f1 =====
SFO1     400.1324710 MHz
NUC1     1H
P1       8.04 use
SI       65536
SF       400.1300004 MHz
WDW      EM
SSB      0
LB       0.30 Hz
GB       0
PC       1.00
  
```

# Electronic Supplementary Information

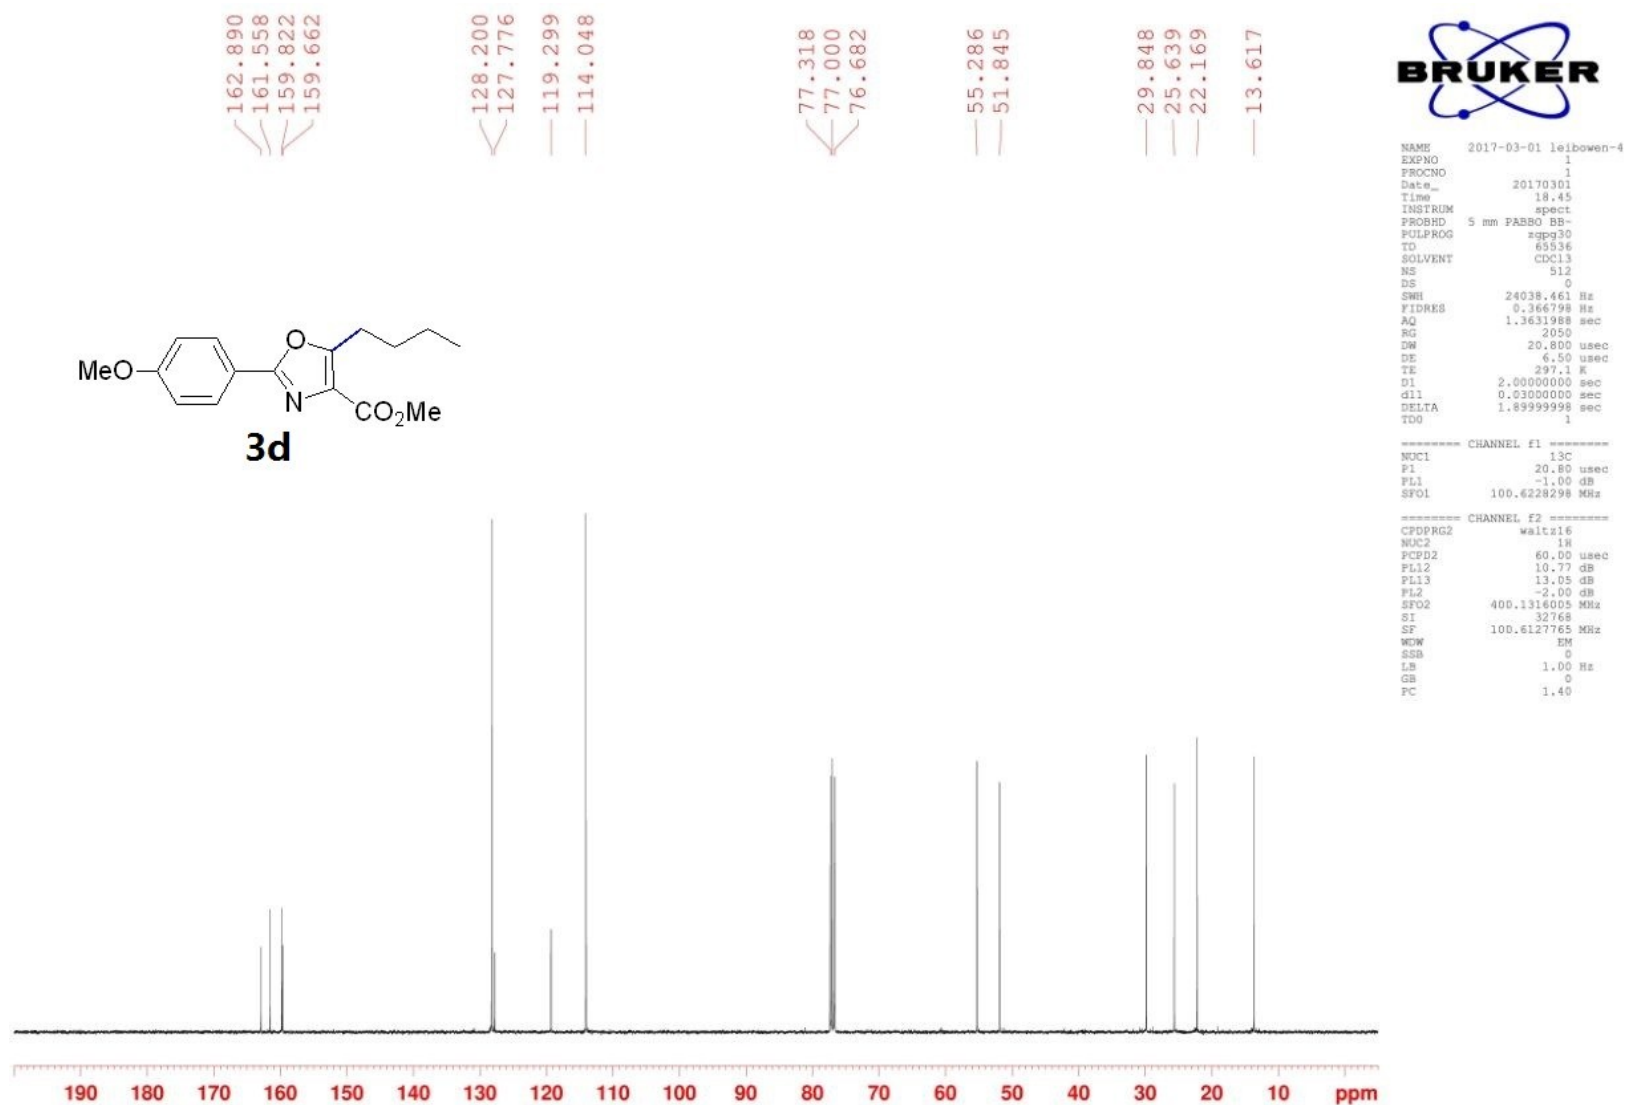

# Electronic Supplementary Information

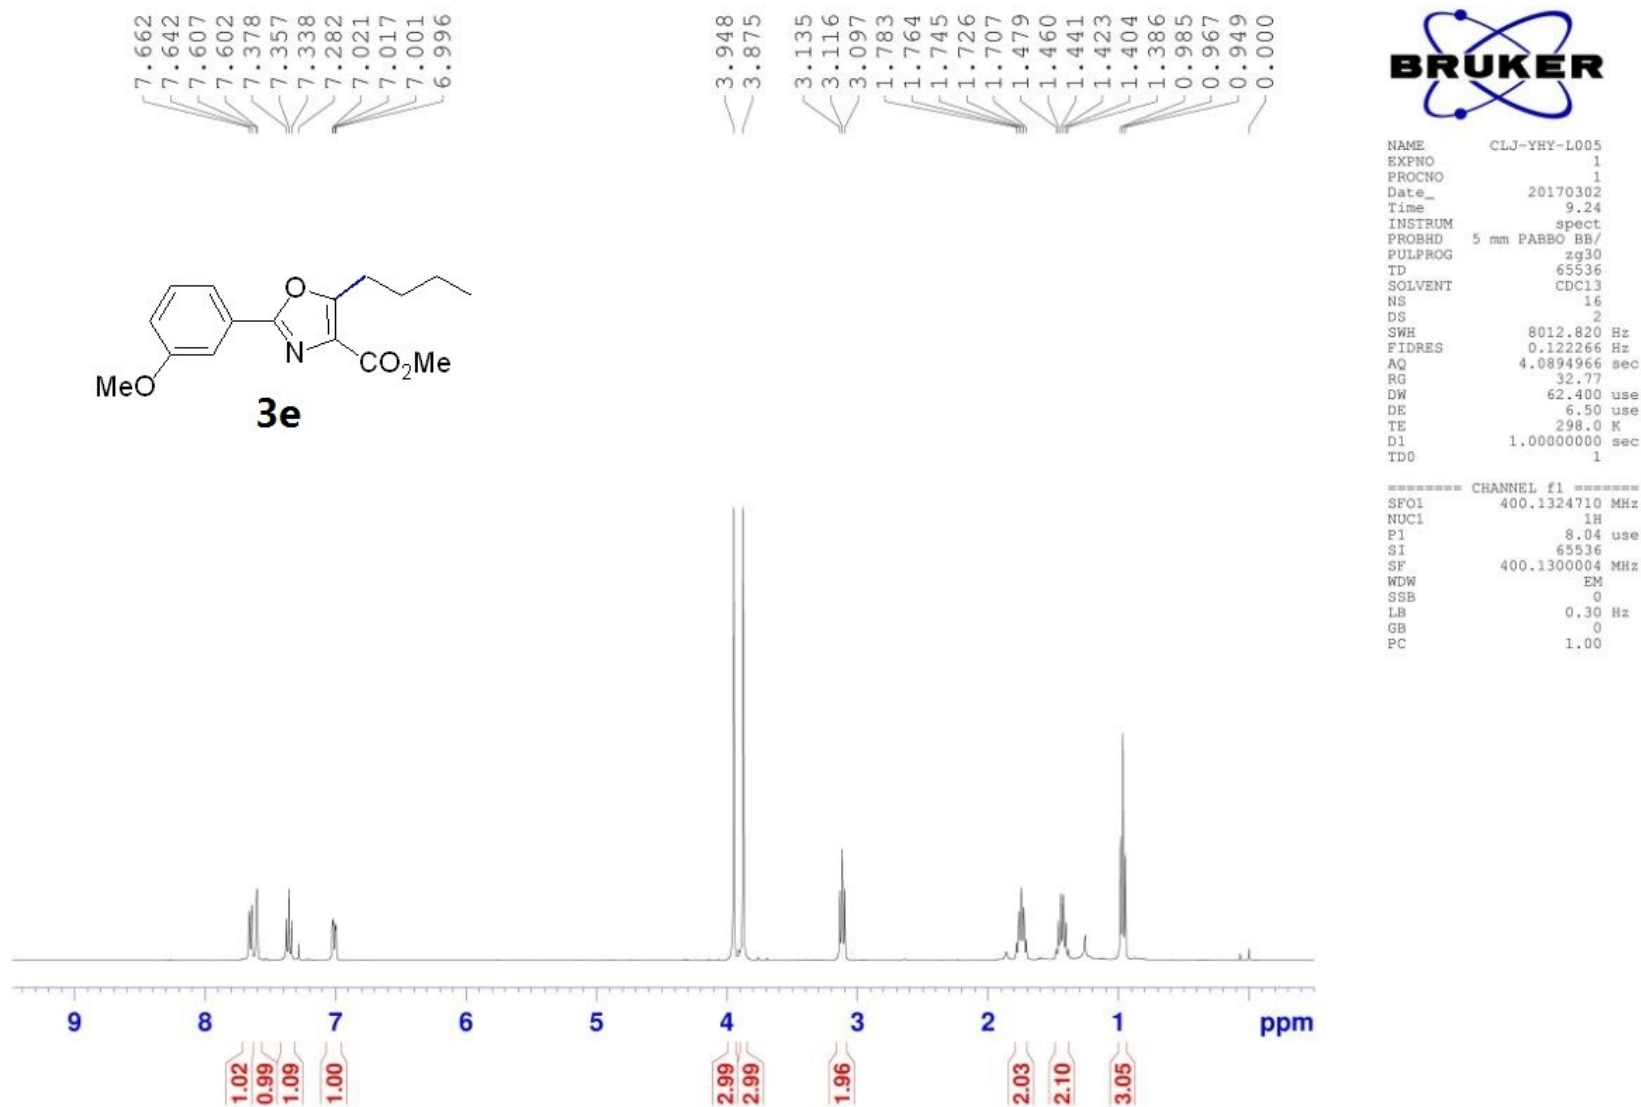

# Electronic Supplementary Information

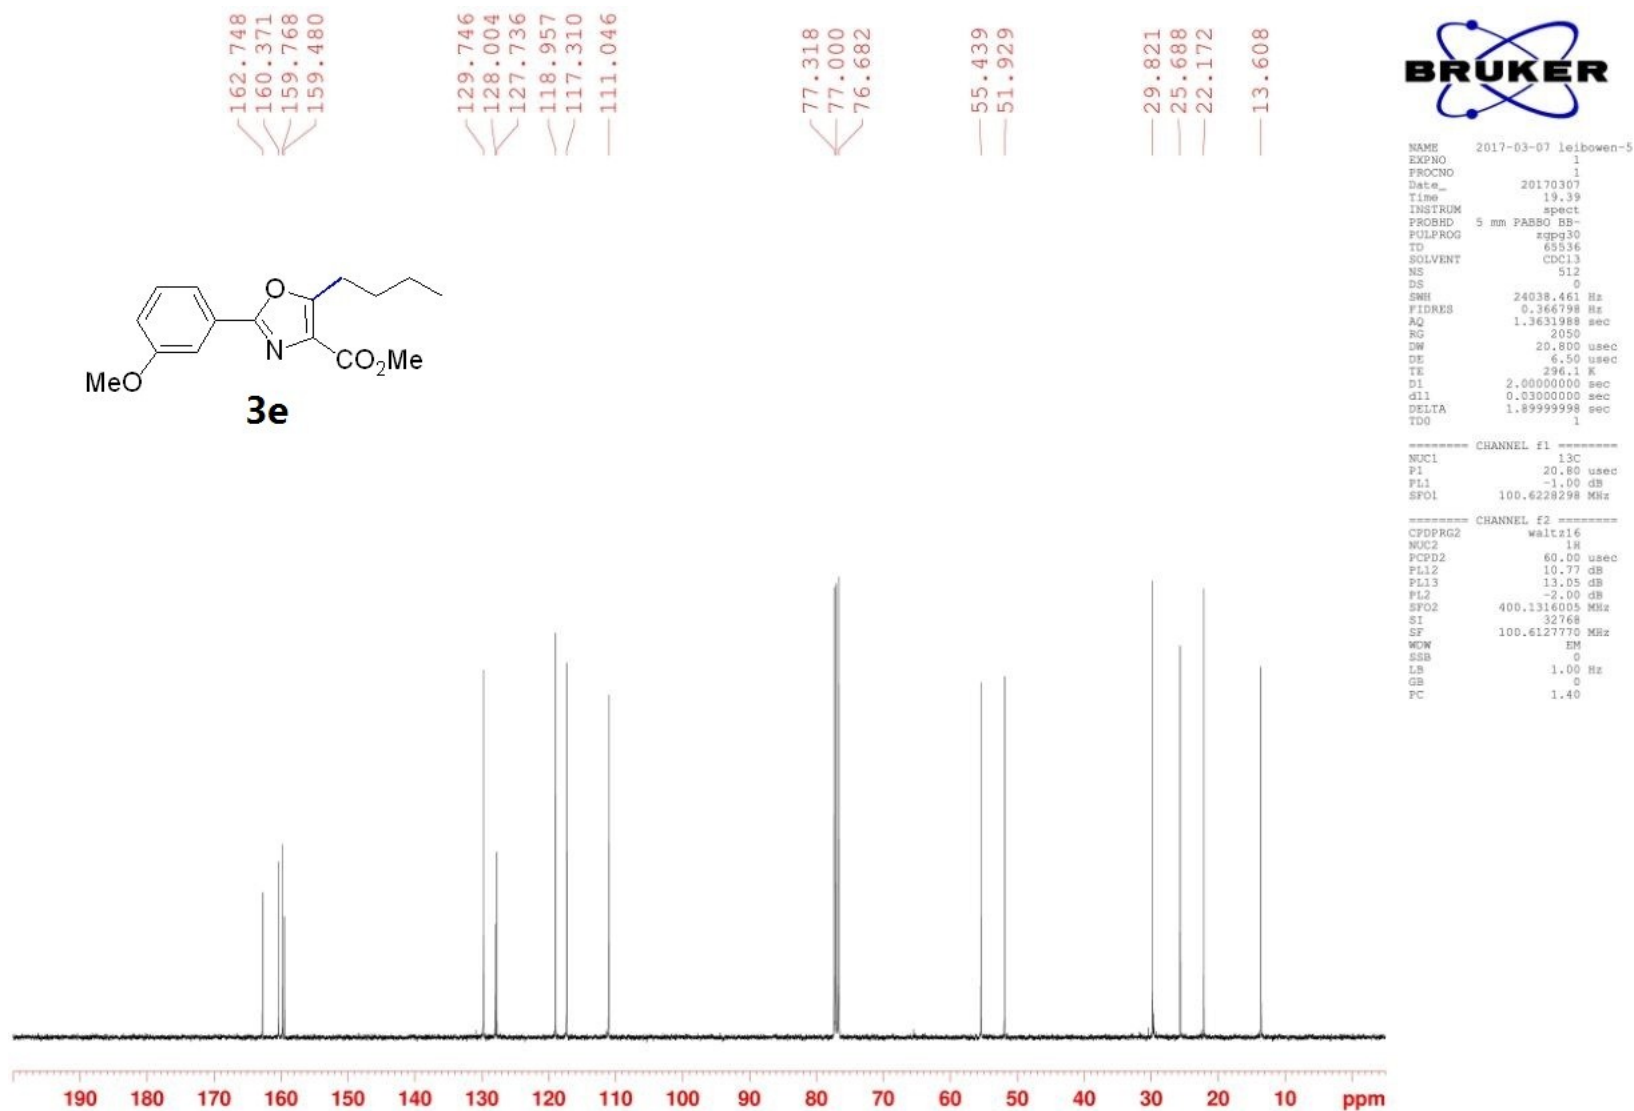

# Electronic Supplementary Information

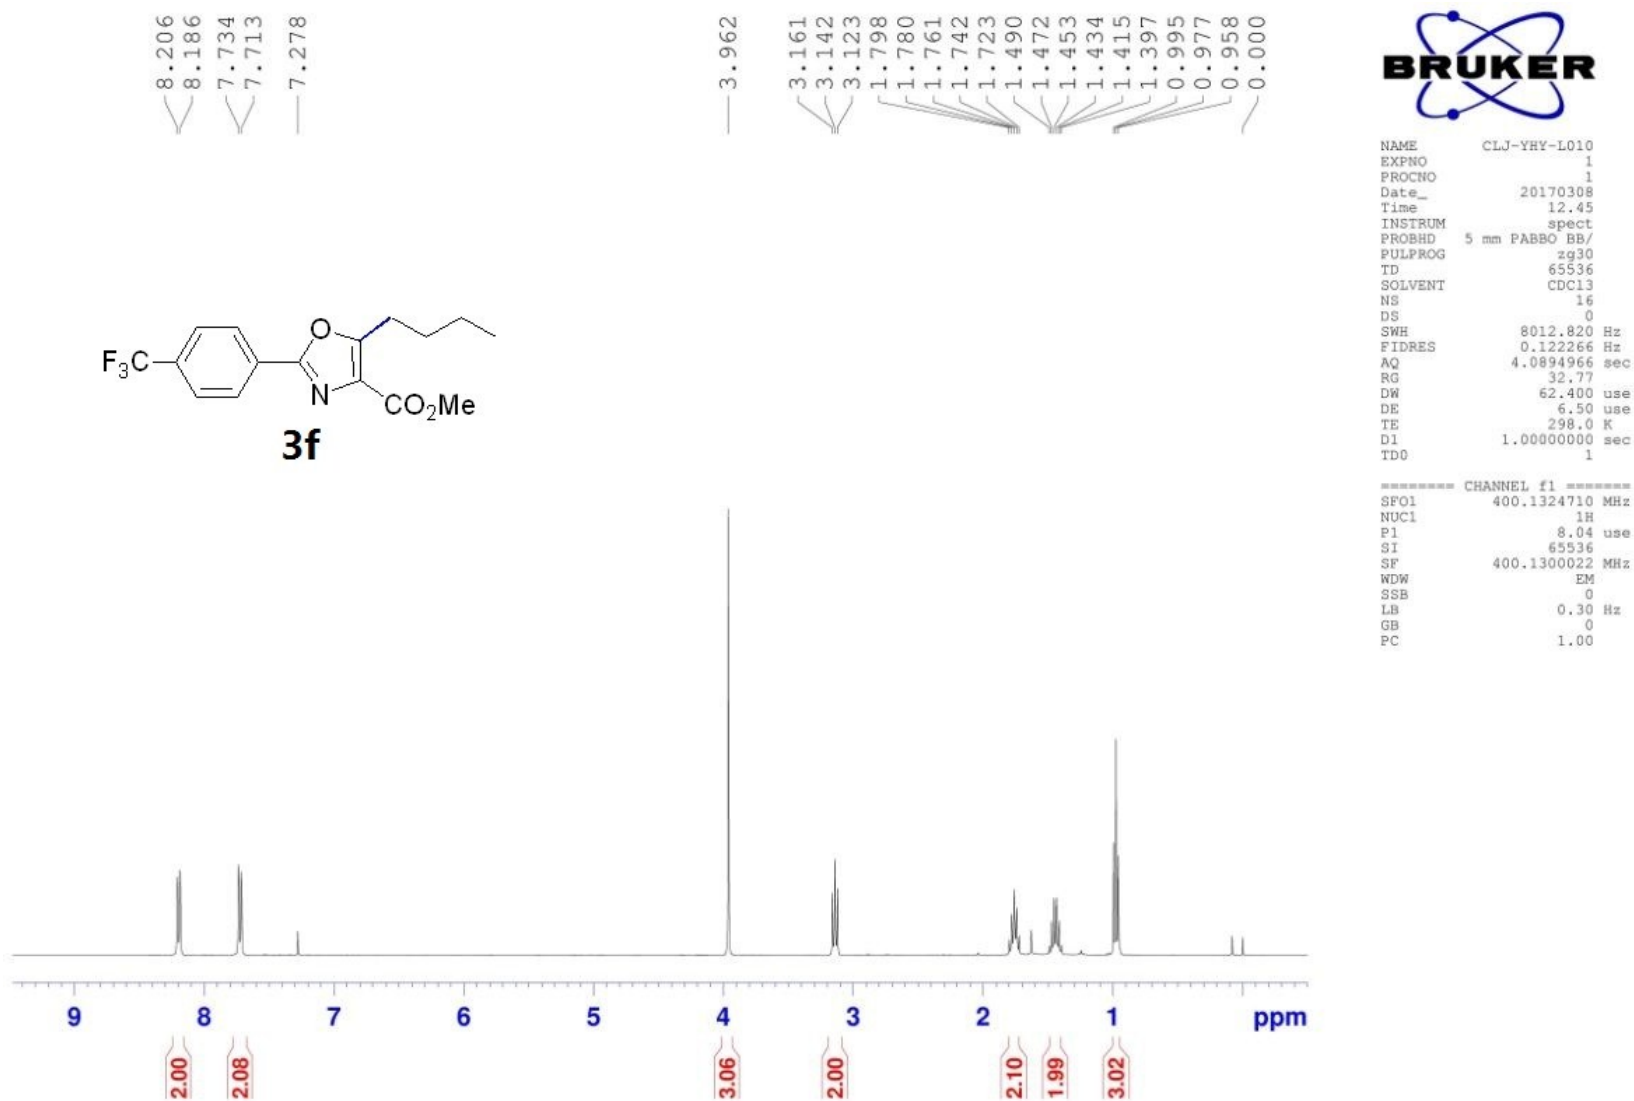

# Electronic Supplementary Information

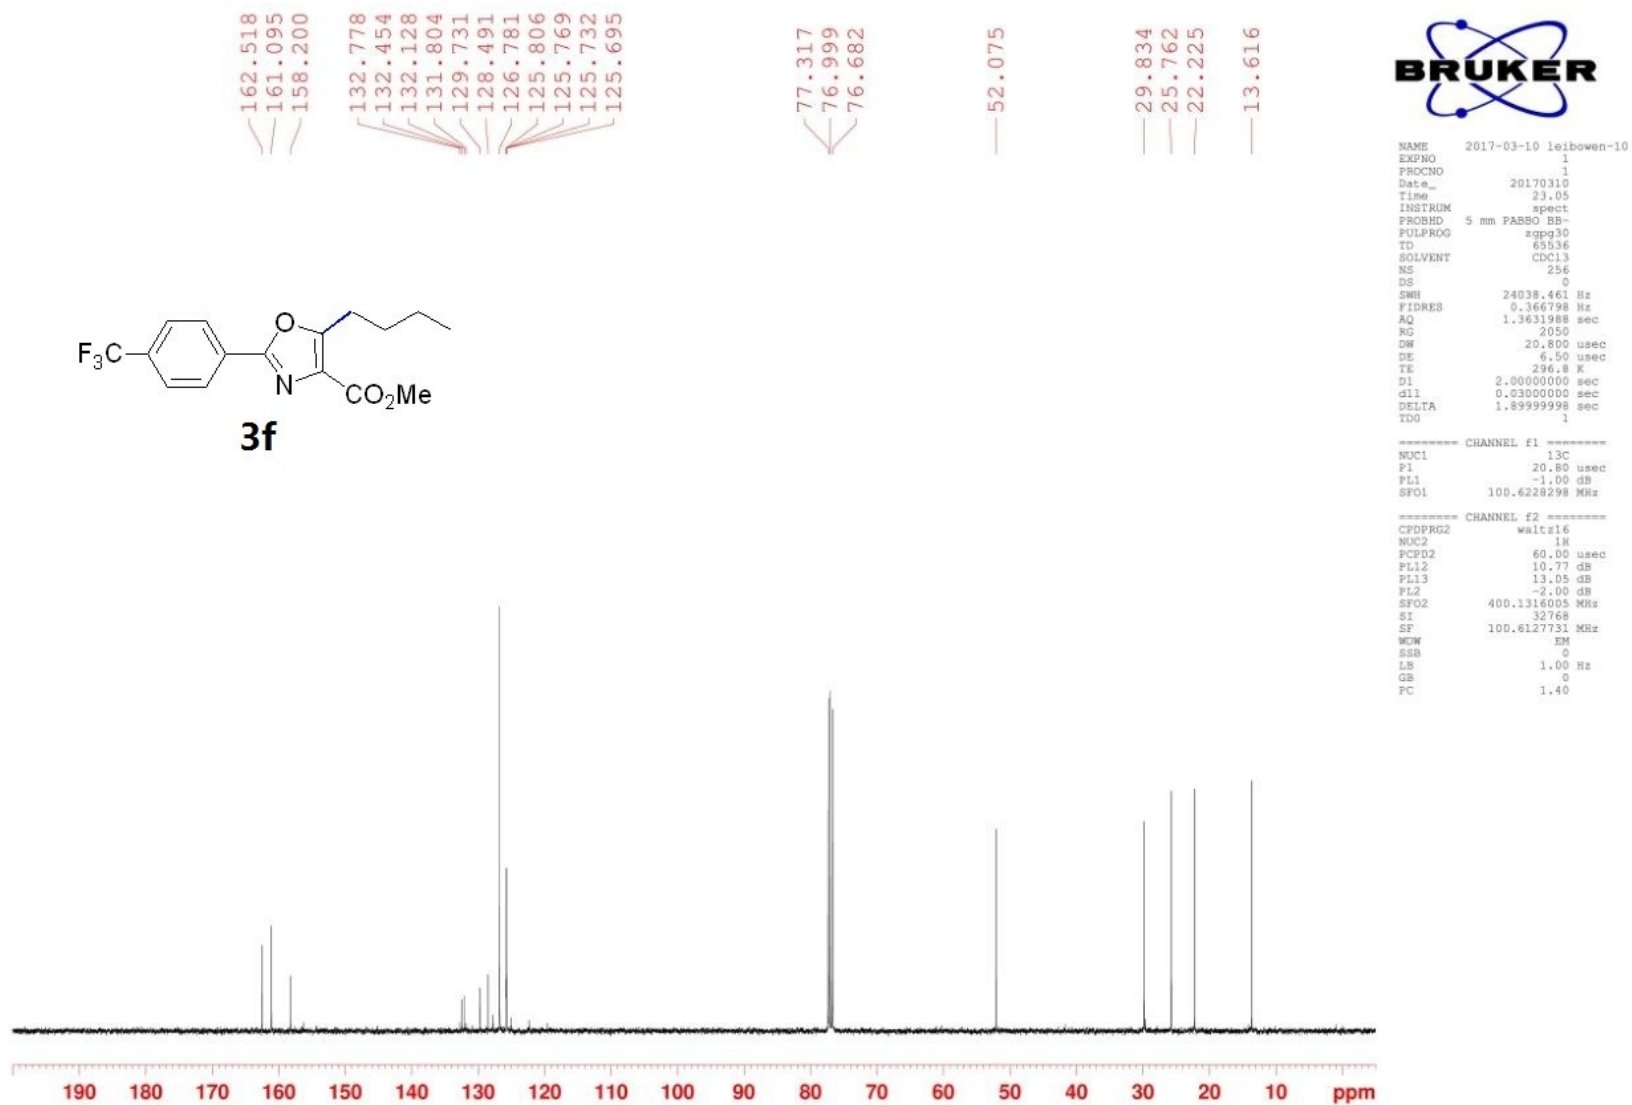

# Electronic Supplementary Information

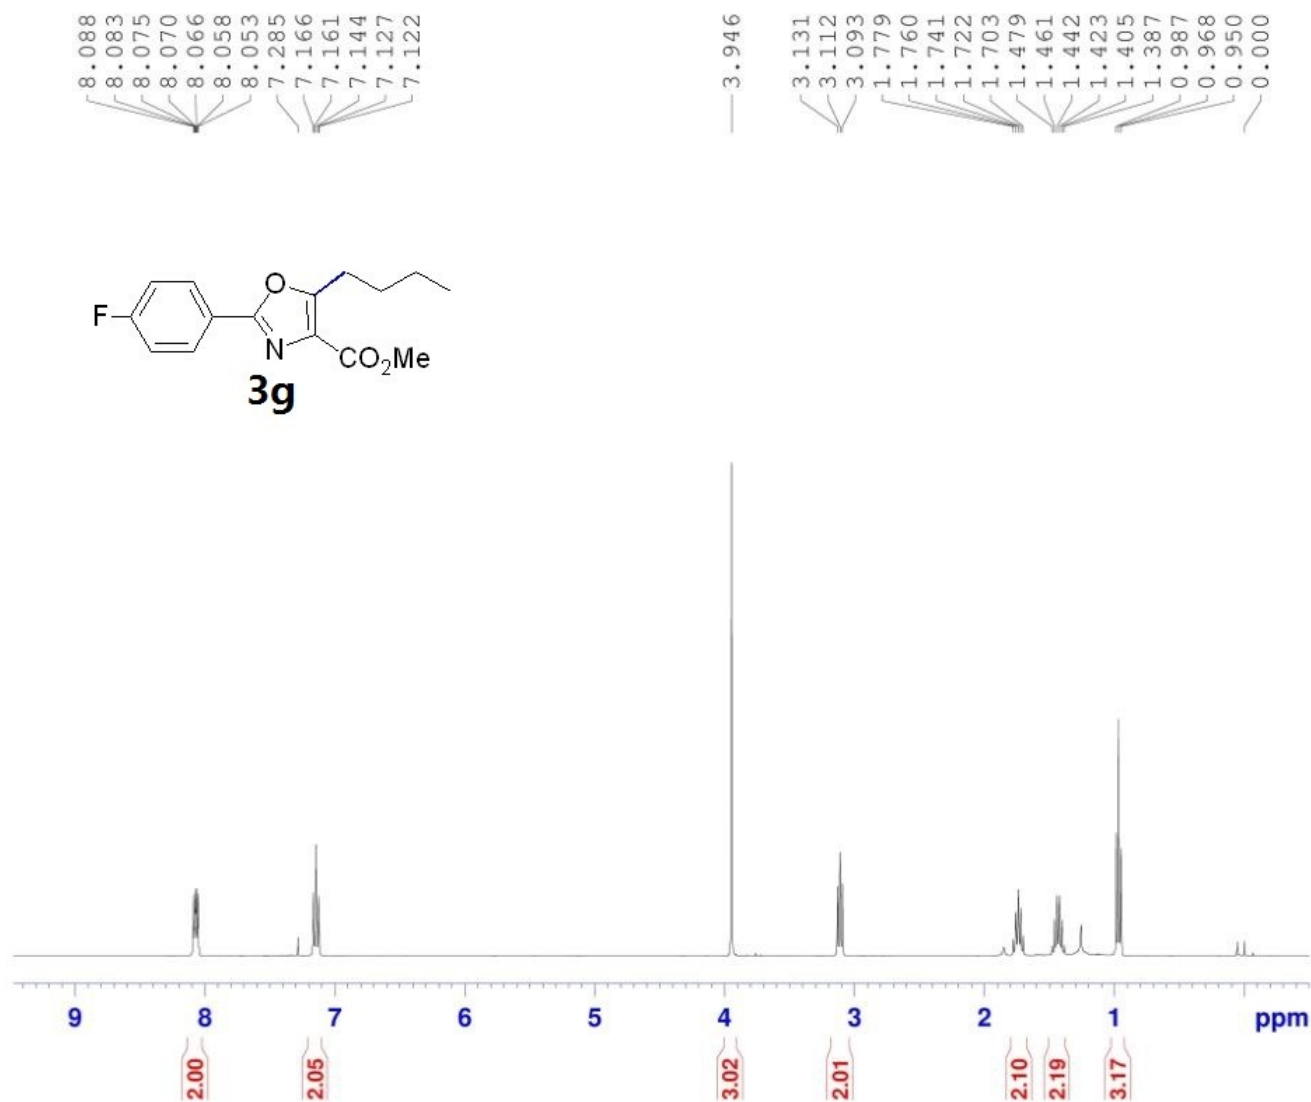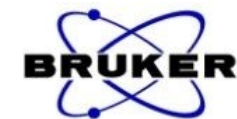

NAME CLJ-YHY-L003  
EXPNO 1  
PROCNO 1  
Date\_ 20170224  
Time 10.48  
INSTRUM spect  
PROBHD 5 mm PABBO BB/  
PULPROG zg30  
TD 65536  
SOLVENT CDCl3  
NS 16  
DS 2  
SWH 8012.820 Hz  
FIDRES 0.122266 Hz  
AQ 4.0894966 sec  
RG 32.77  
DW 62.400 use  
DE 6.50 use  
TE 298.0 K  
D1 1.00000000 sec  
TD0 1

\*\*\*\*\* CHANNEL f1 \*\*\*\*\*  
SFO1 400.1324710 MHz  
NUC1 1H  
P1 8.04 use  
SI 65536  
SF 400.1299996 MHz  
NDW EM  
SSB 0  
LB 0.30 Hz  
GB 0  
PC 1.00

# Electronic Supplementary Information

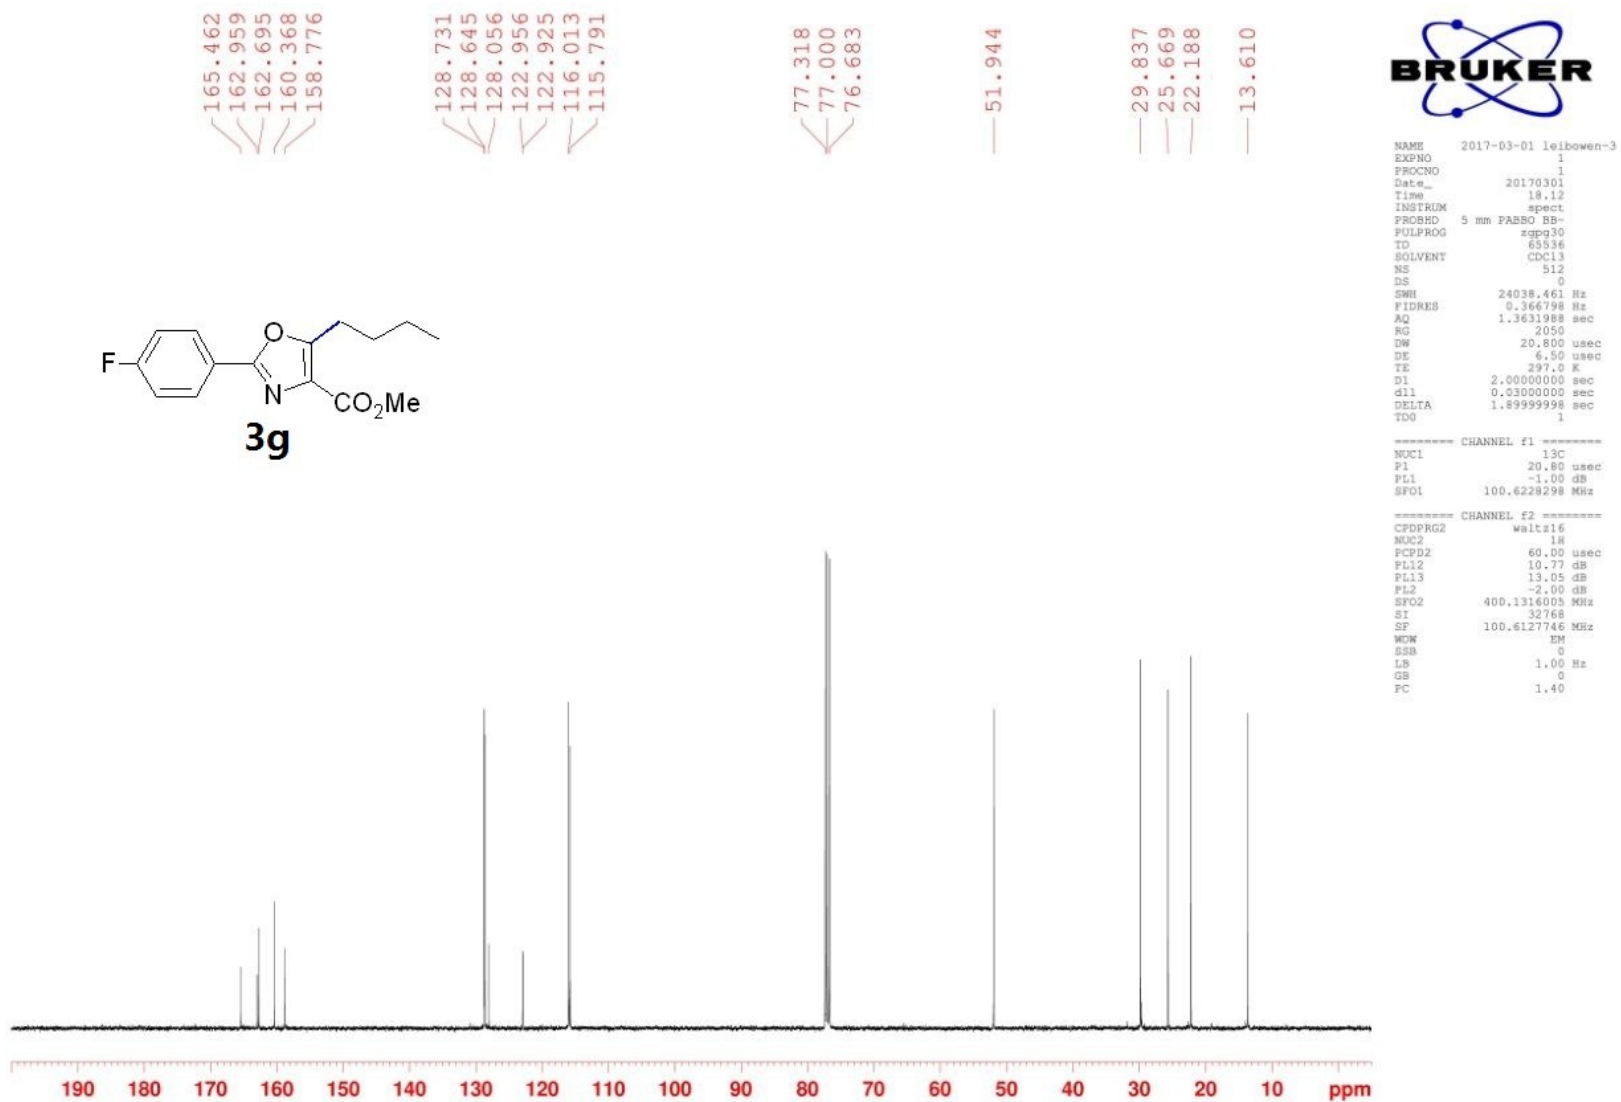

# Electronic Supplementary Information

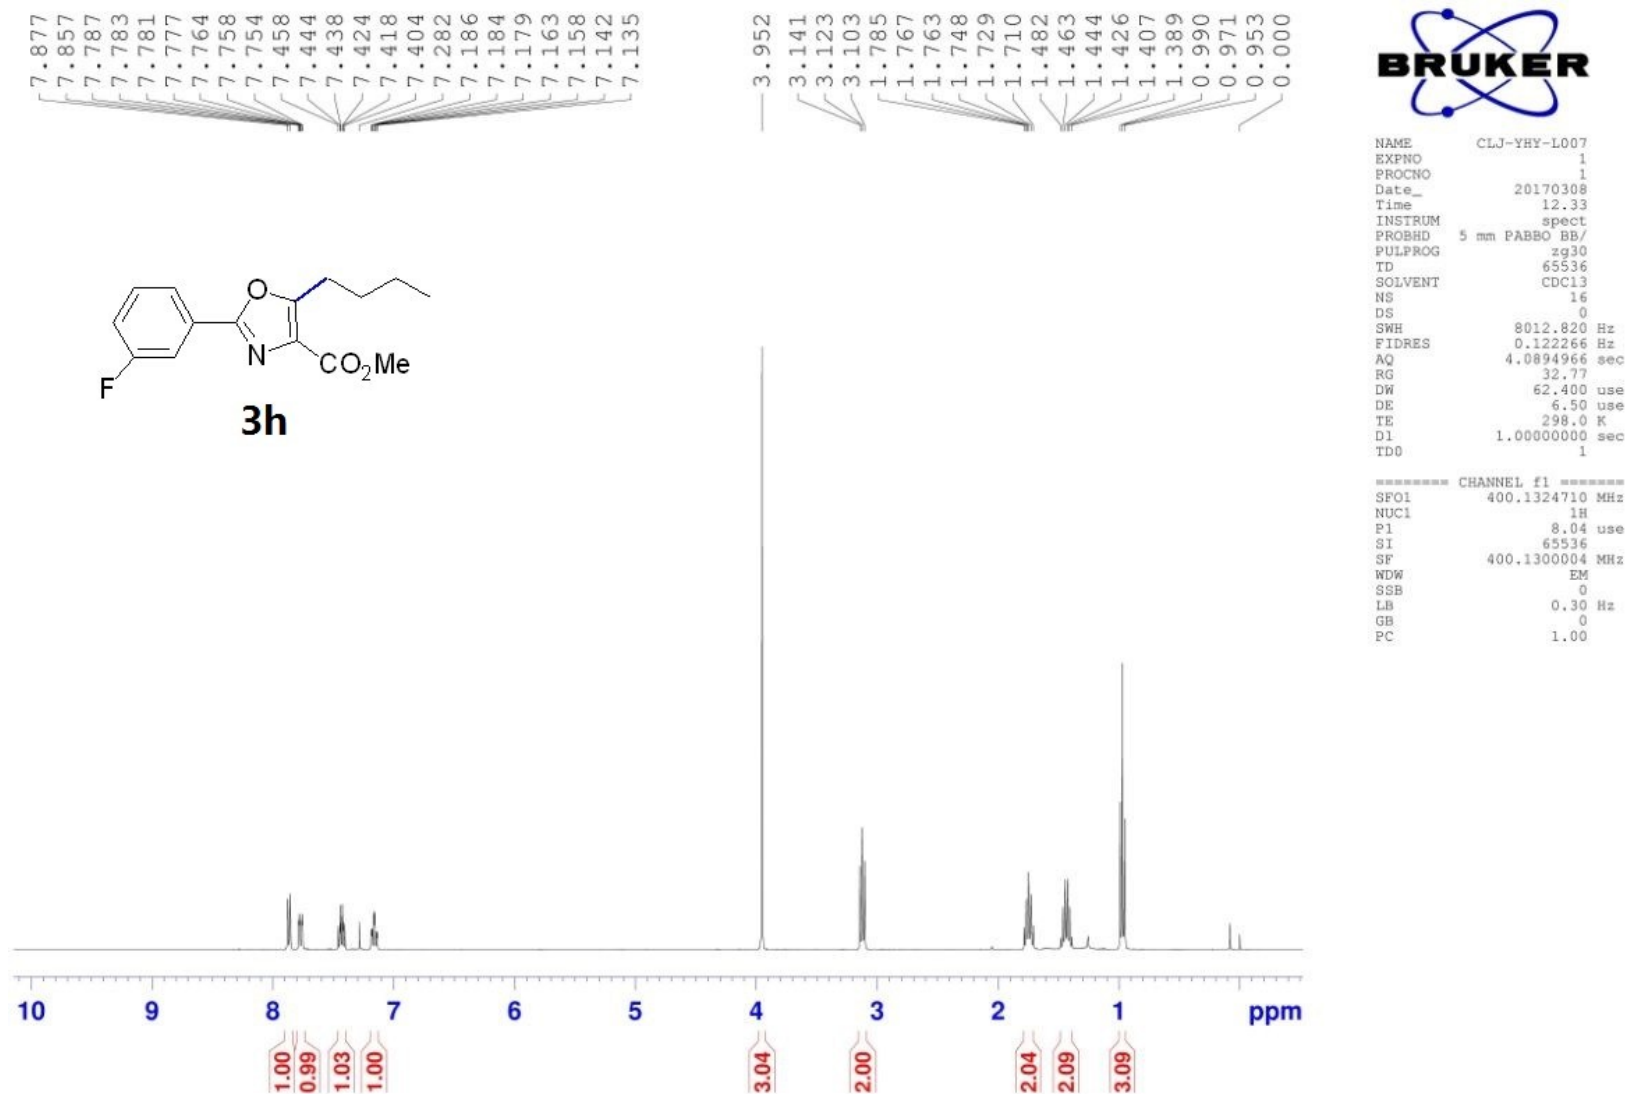

# Electronic Supplementary Information

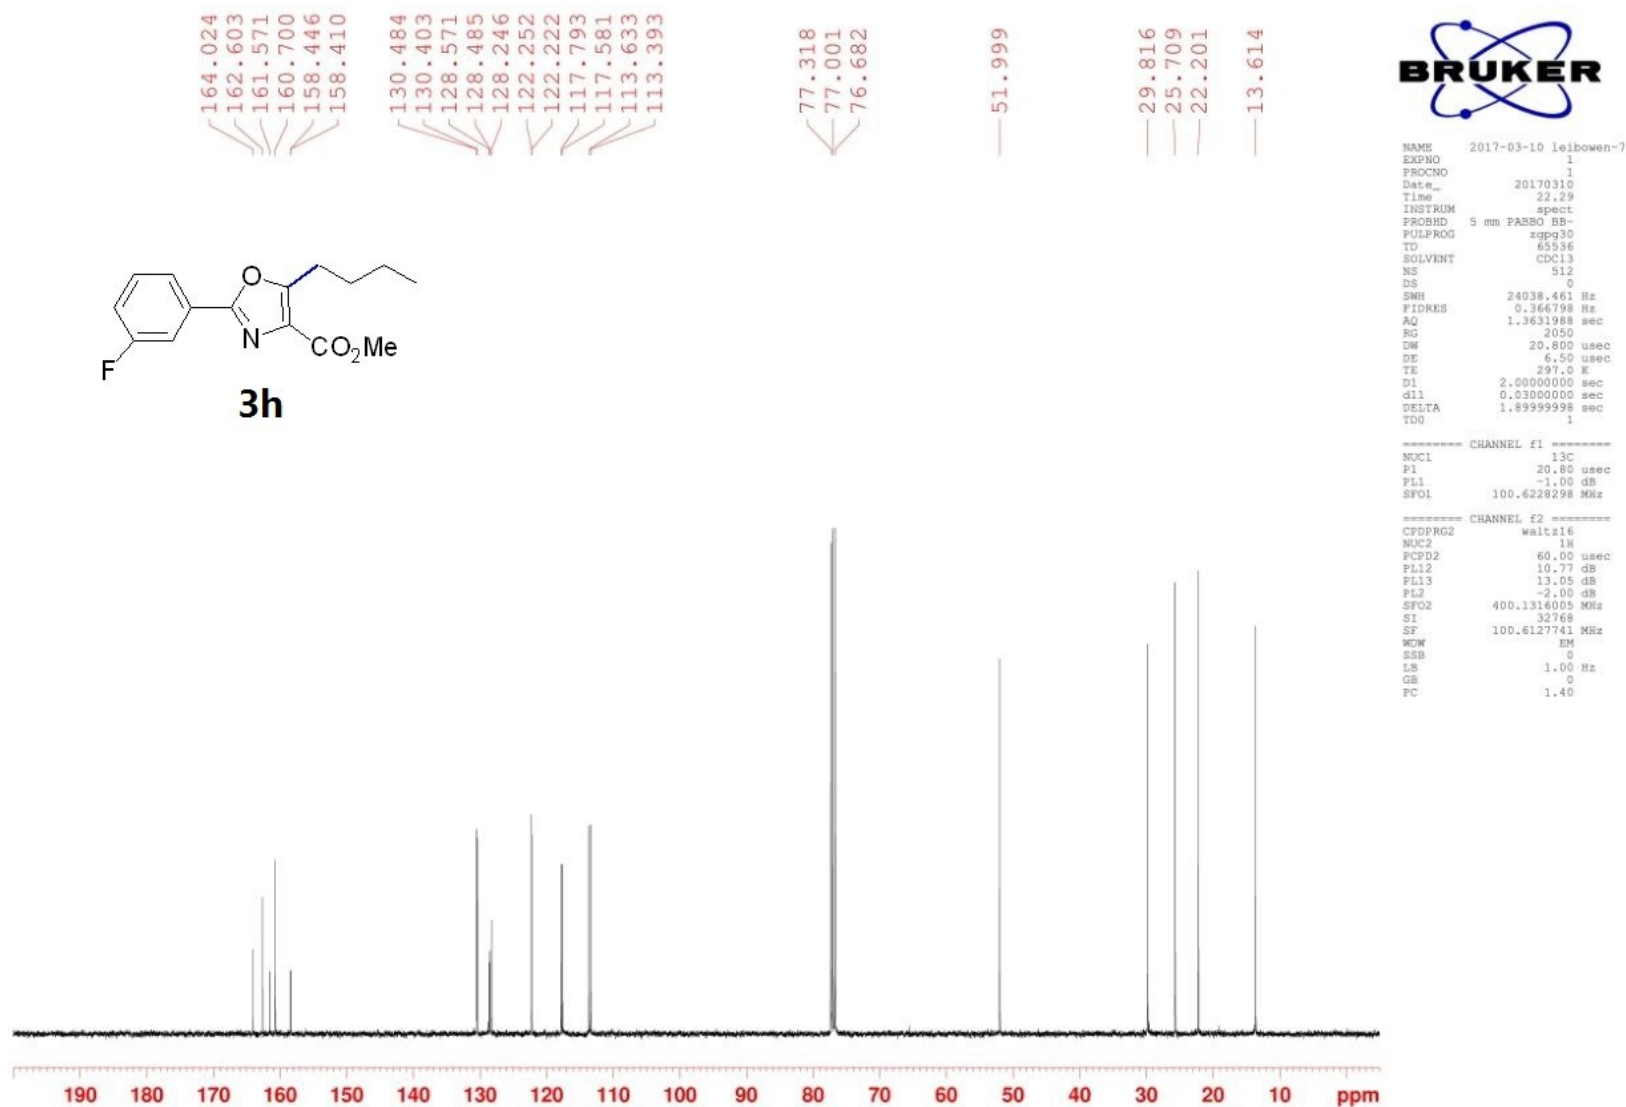

# Electronic Supplementary Information

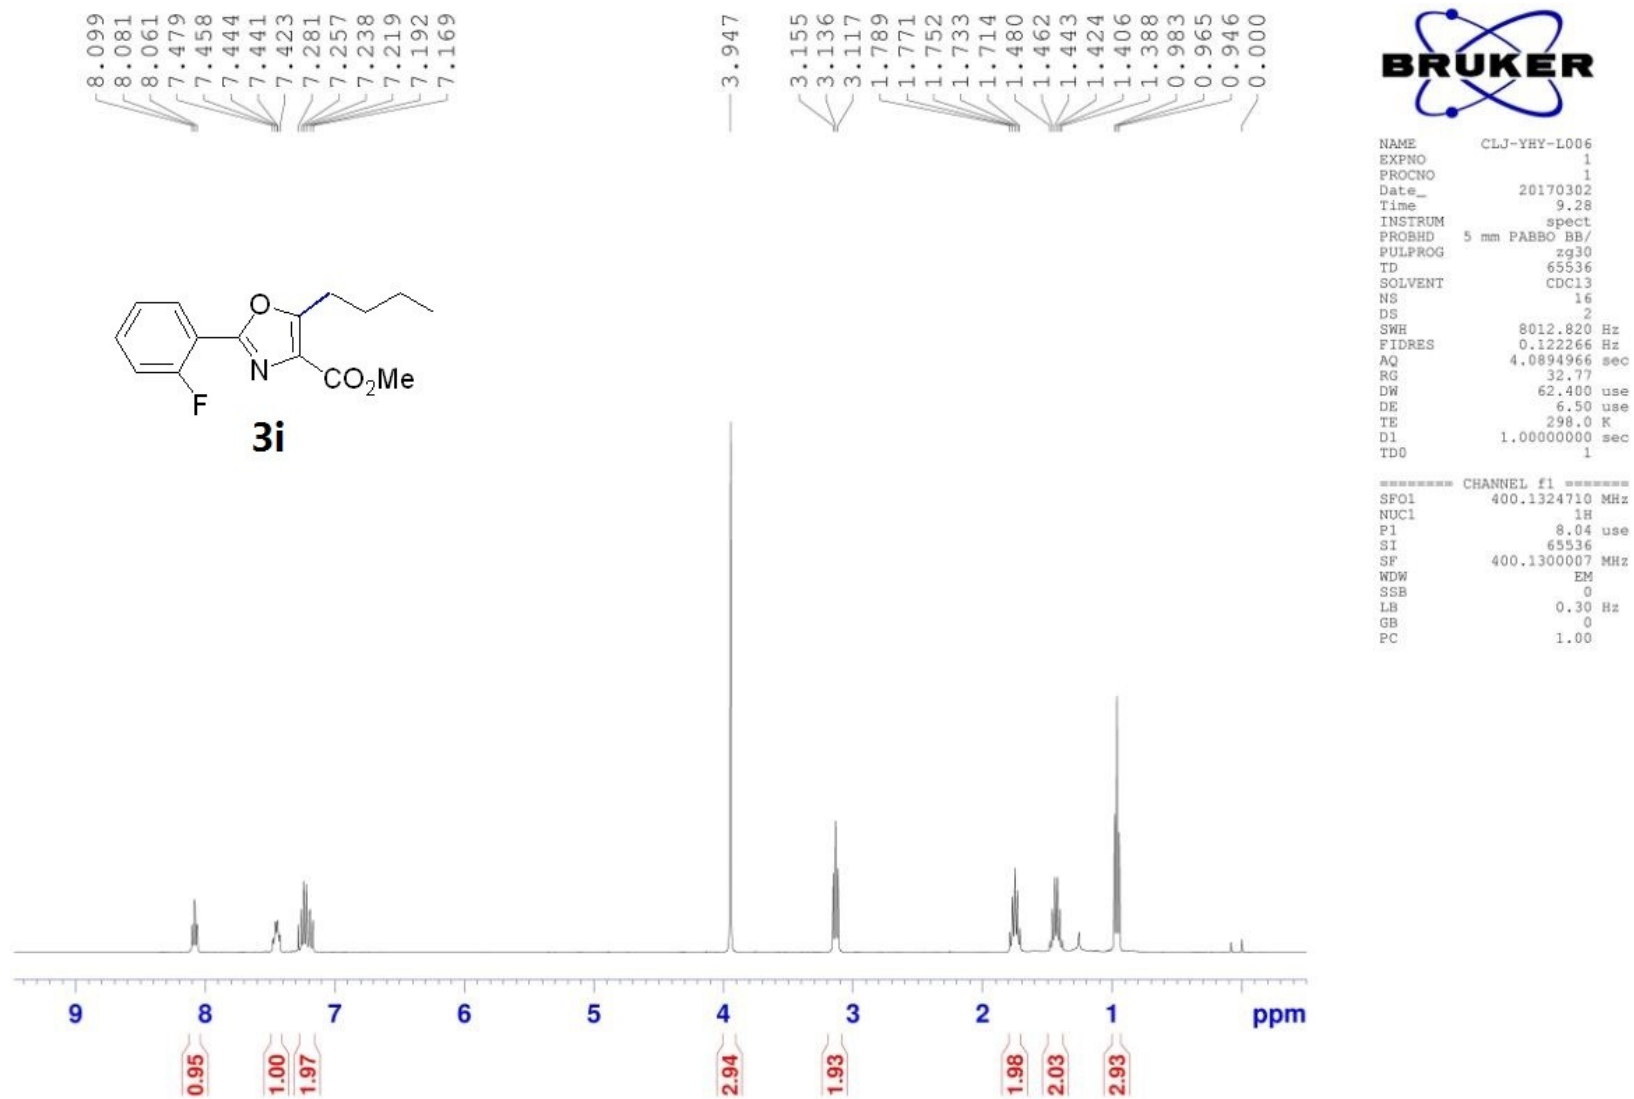

# Electronic Supplementary Information

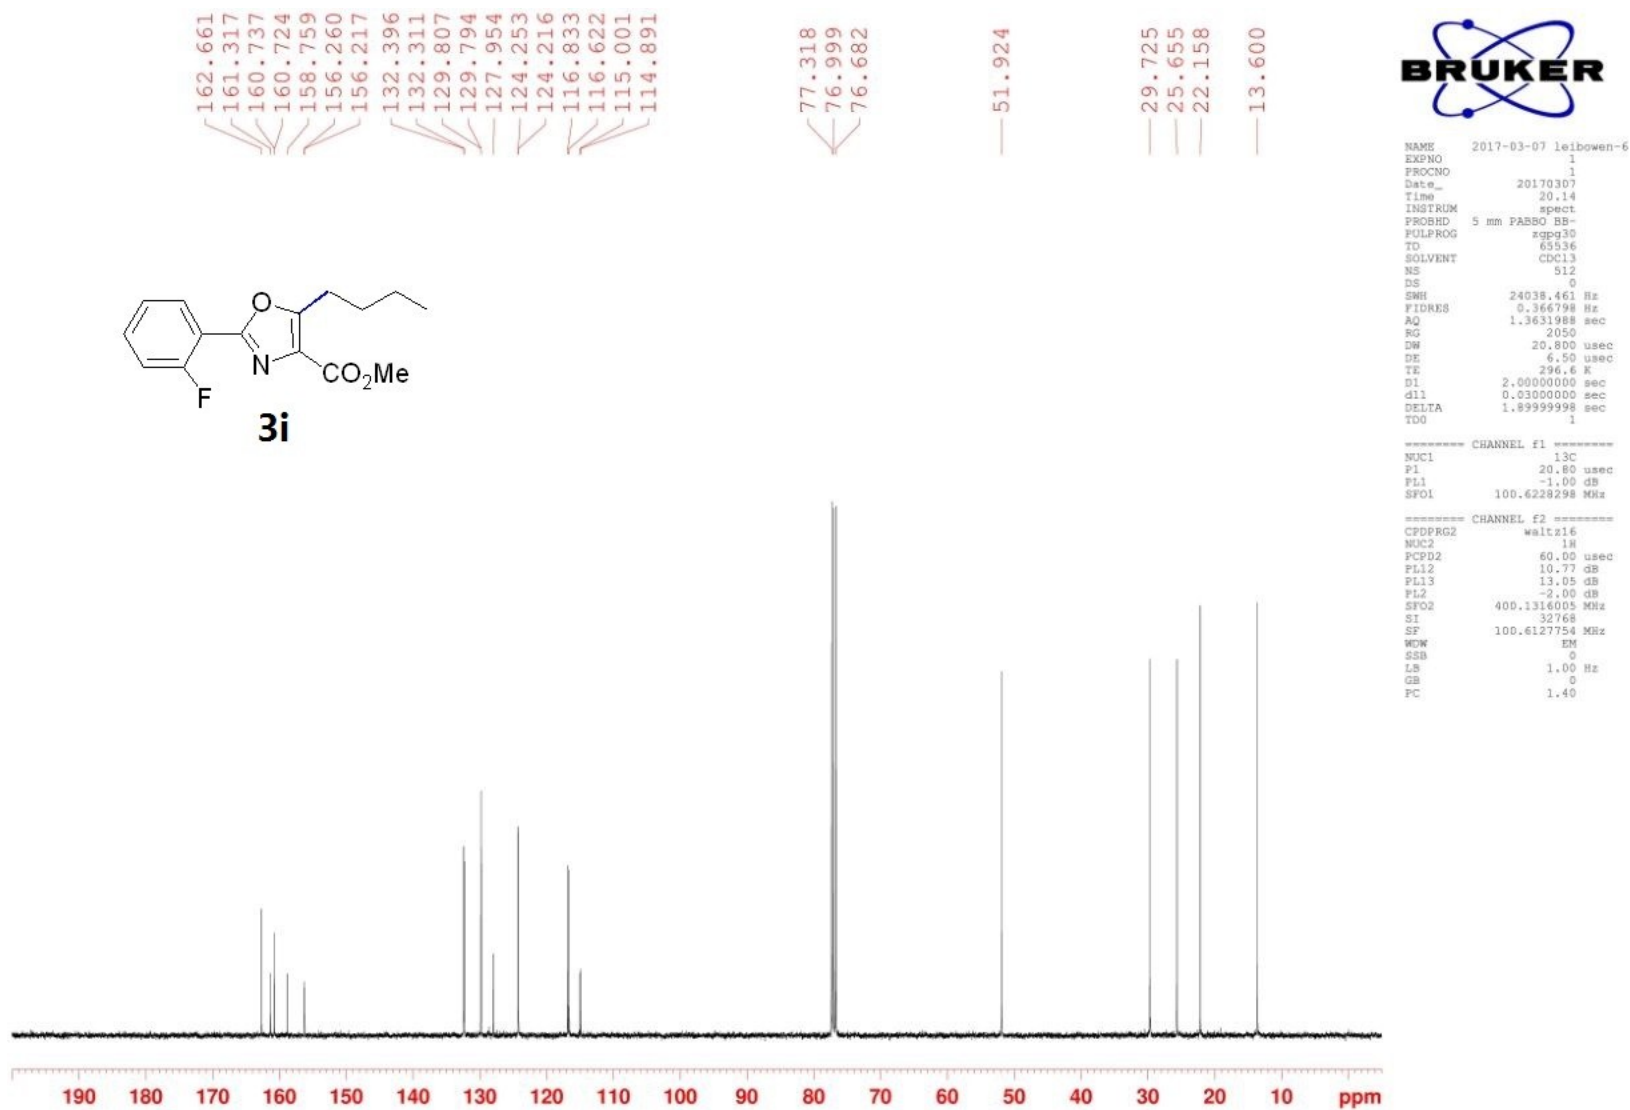

# Electronic Supplementary Information

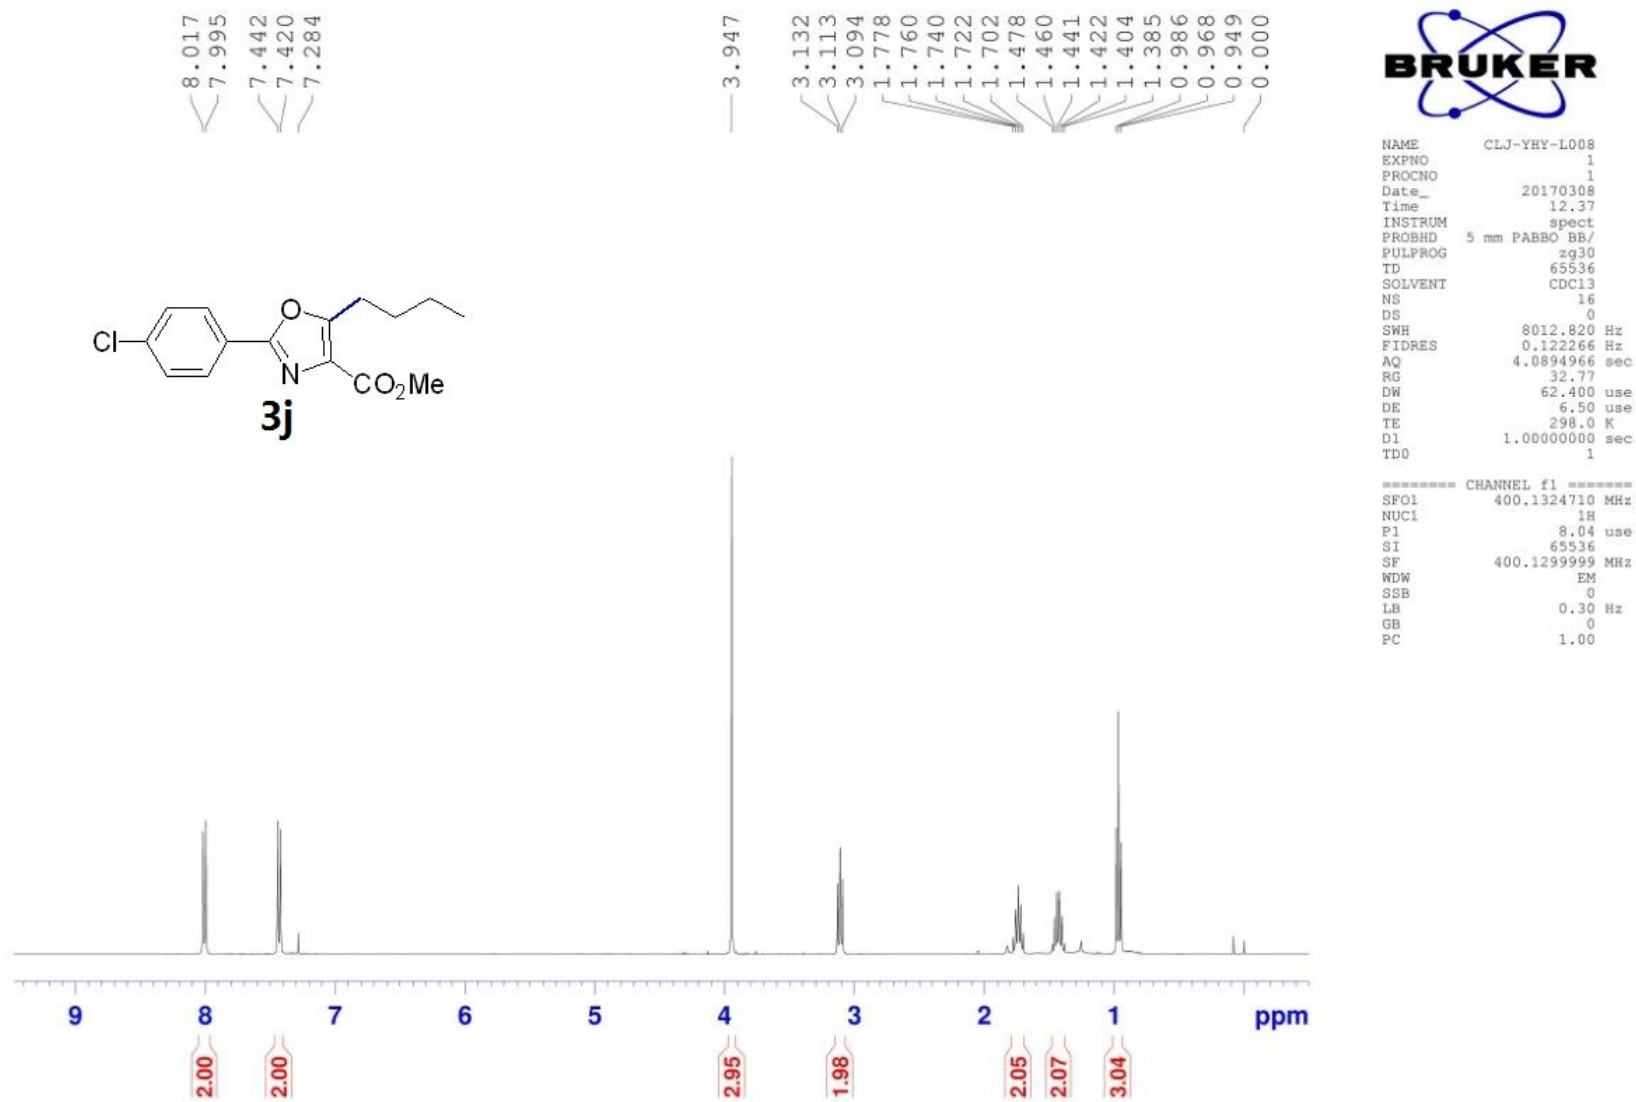

# Electronic Supplementary Information

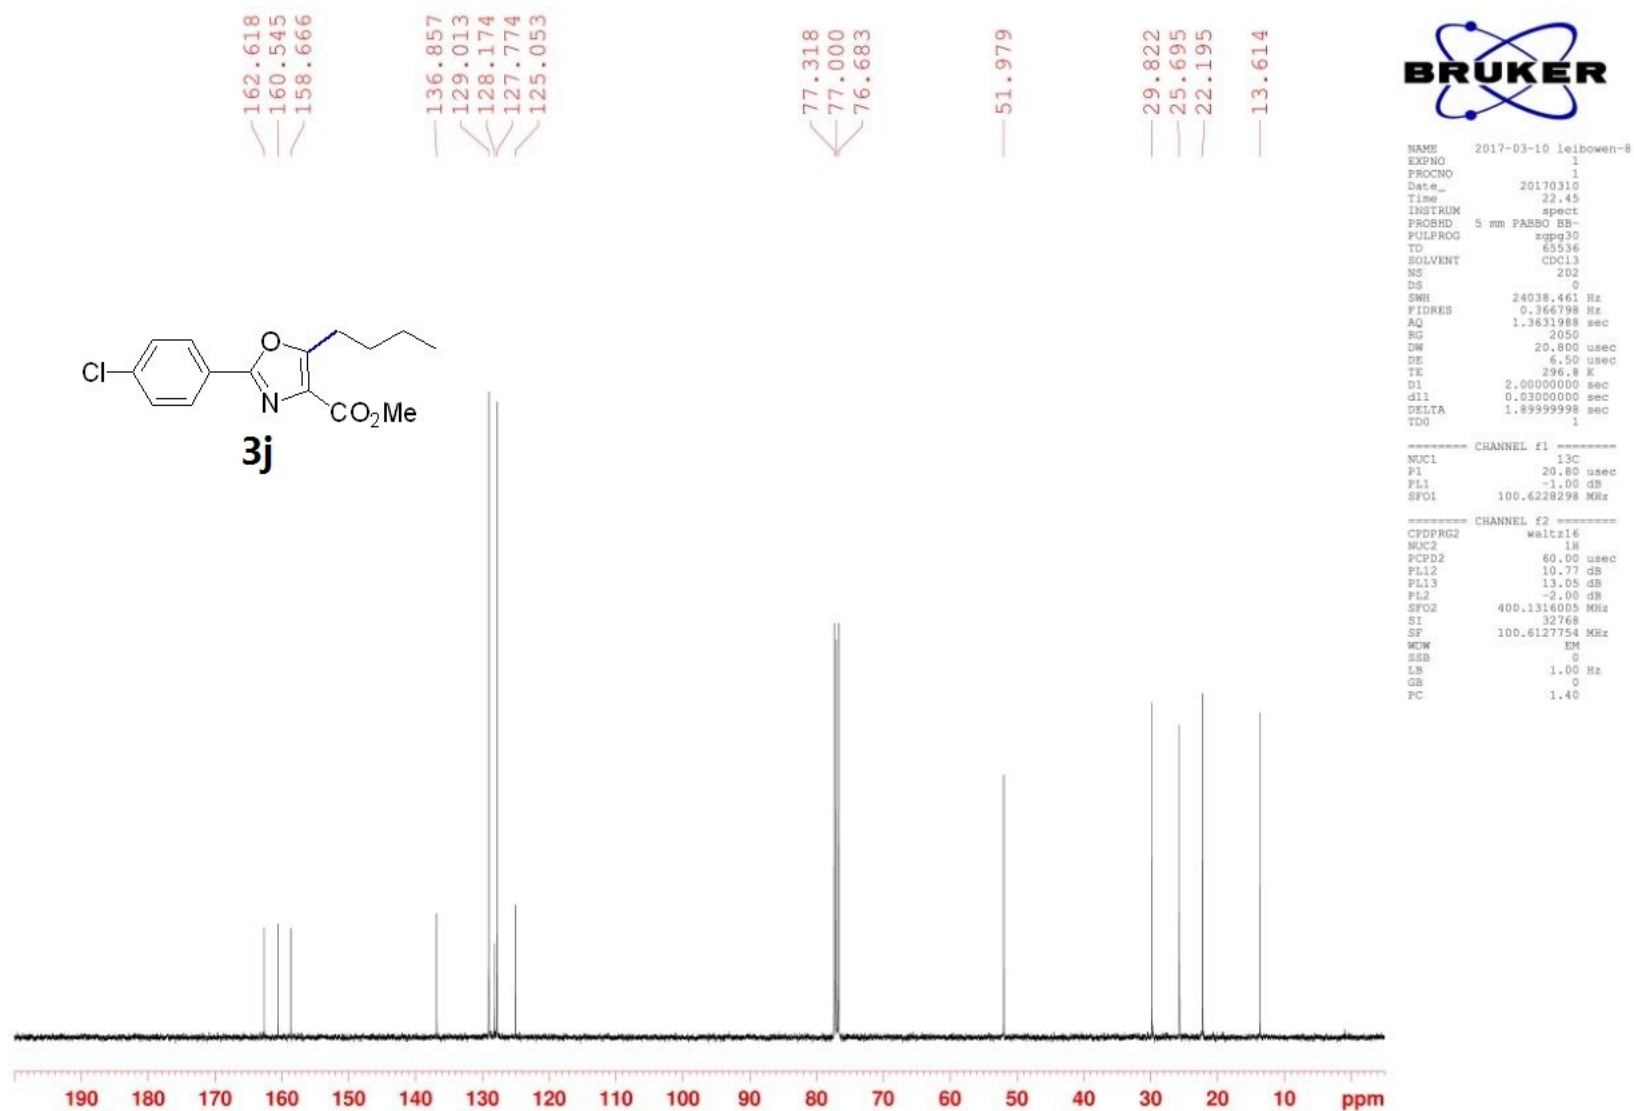

# Electronic Supplementary Information

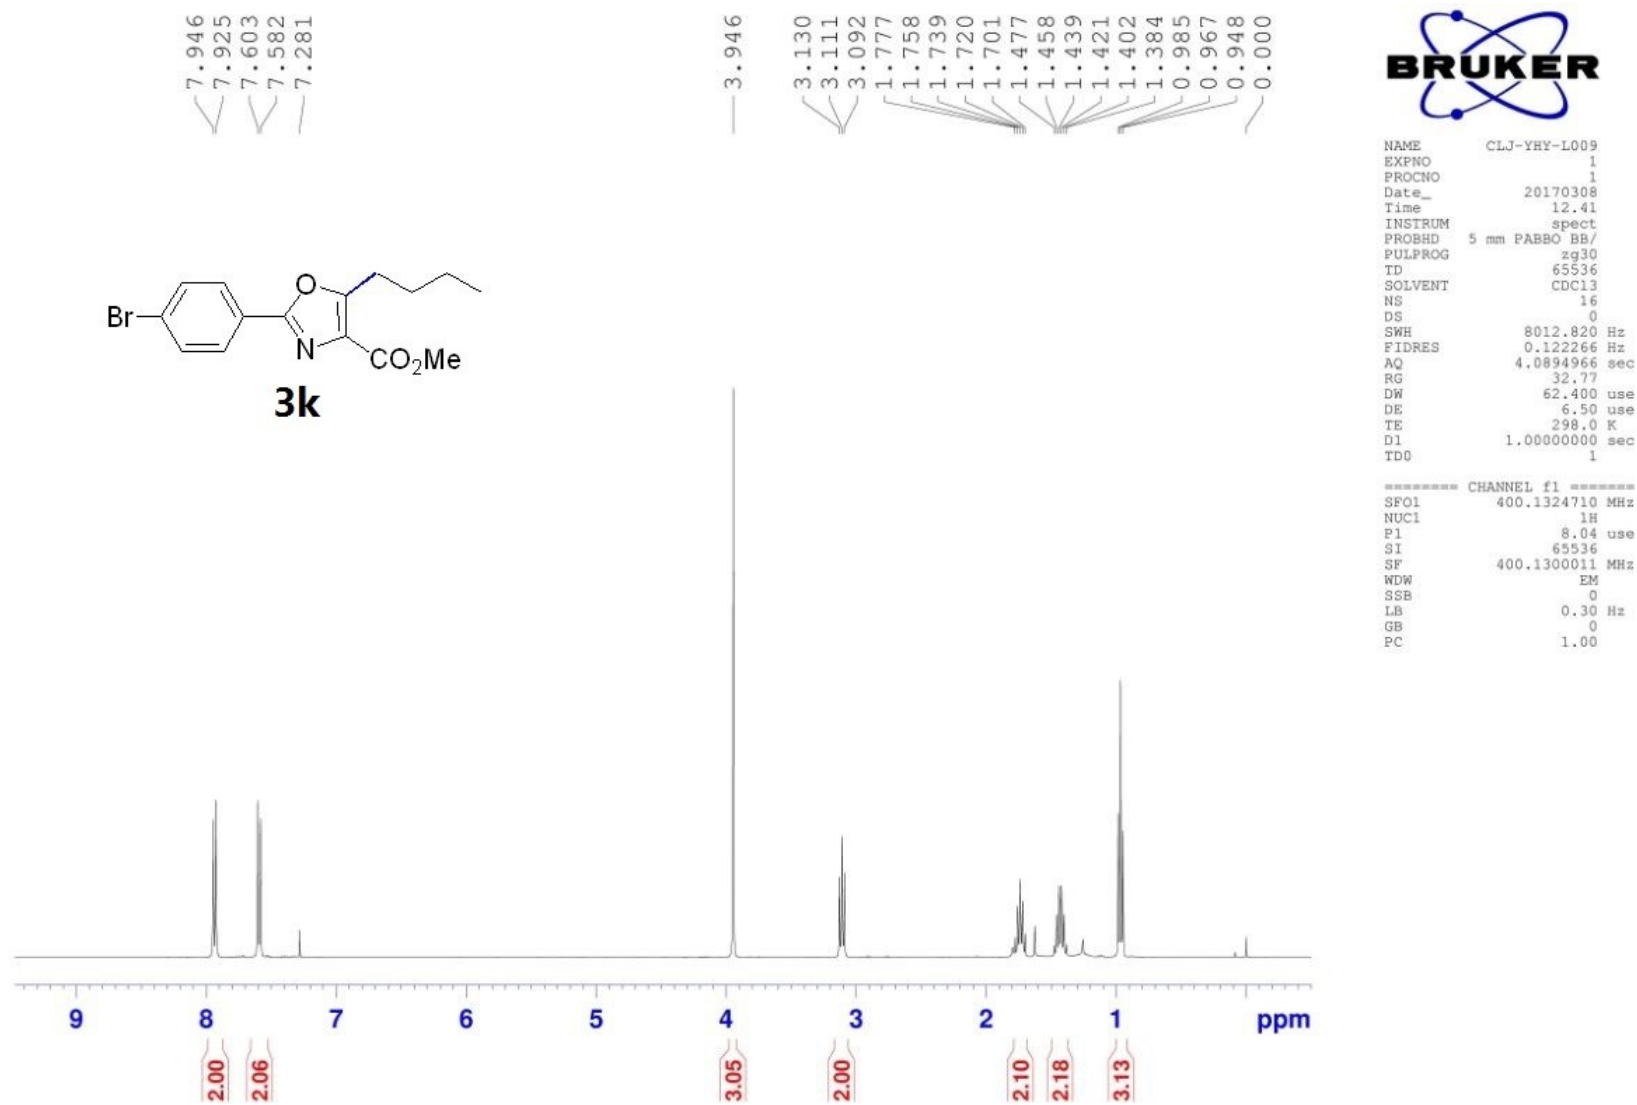

# Electronic Supplementary Information

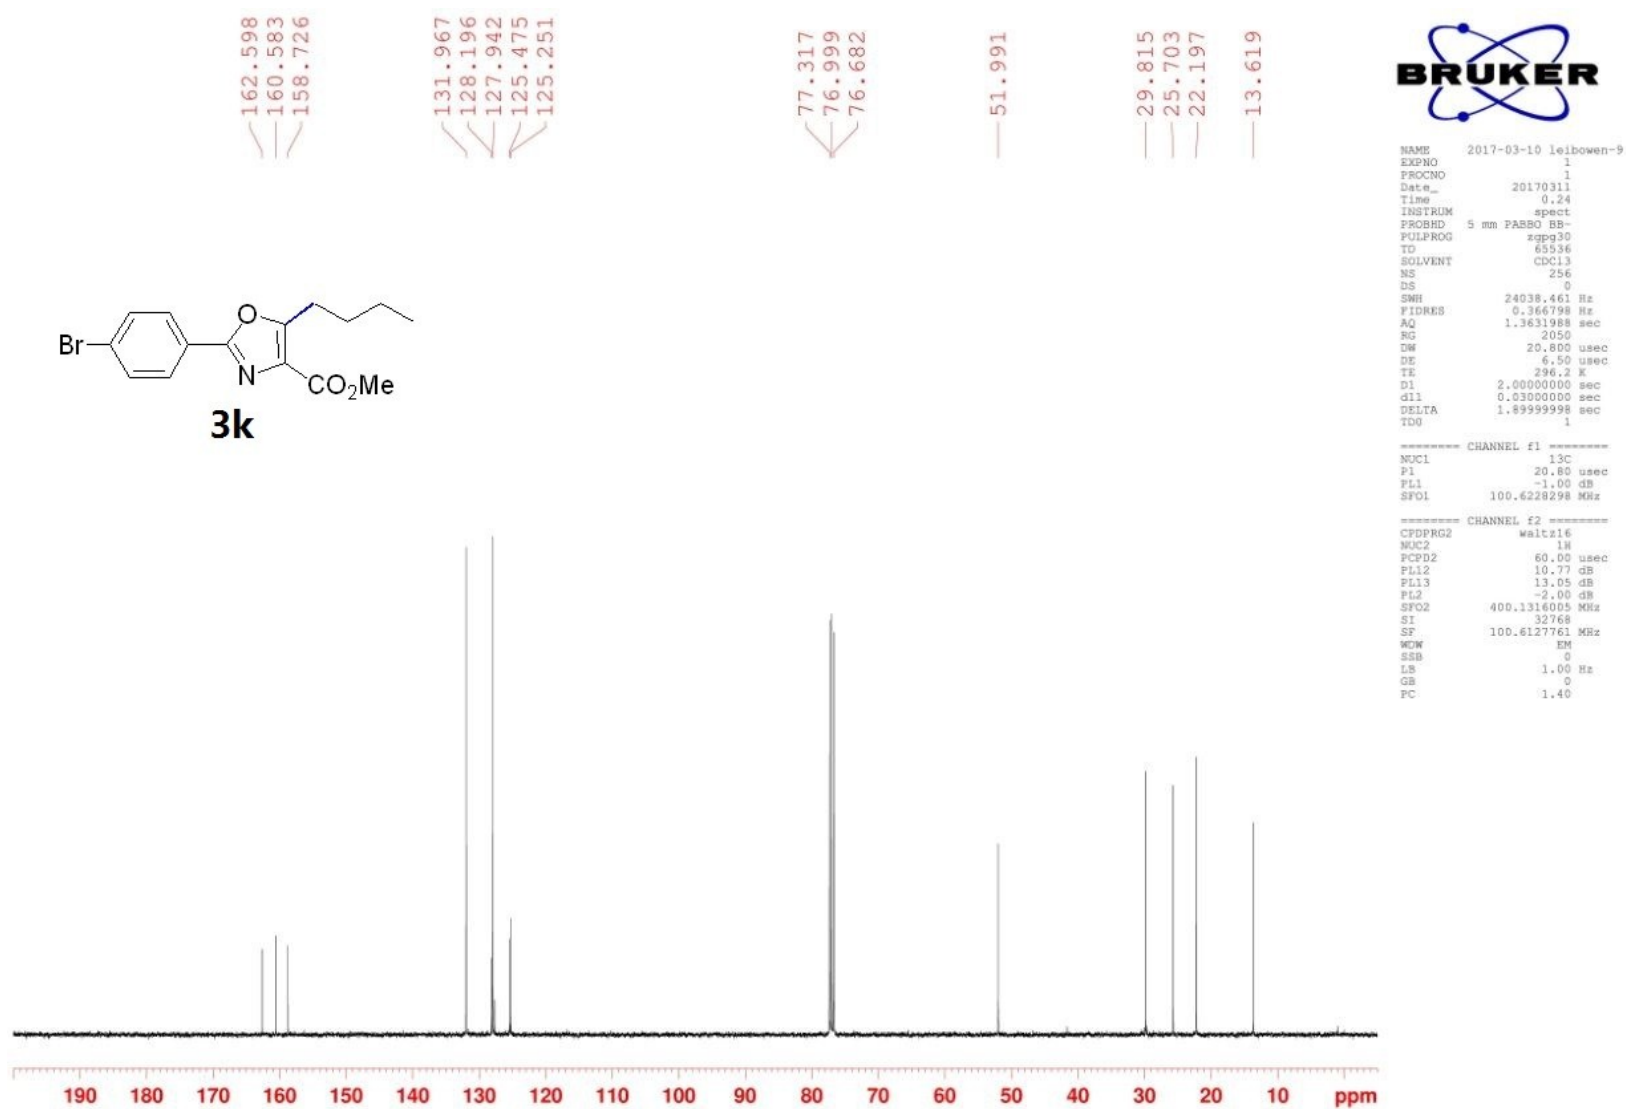

# Electronic Supplementary Information

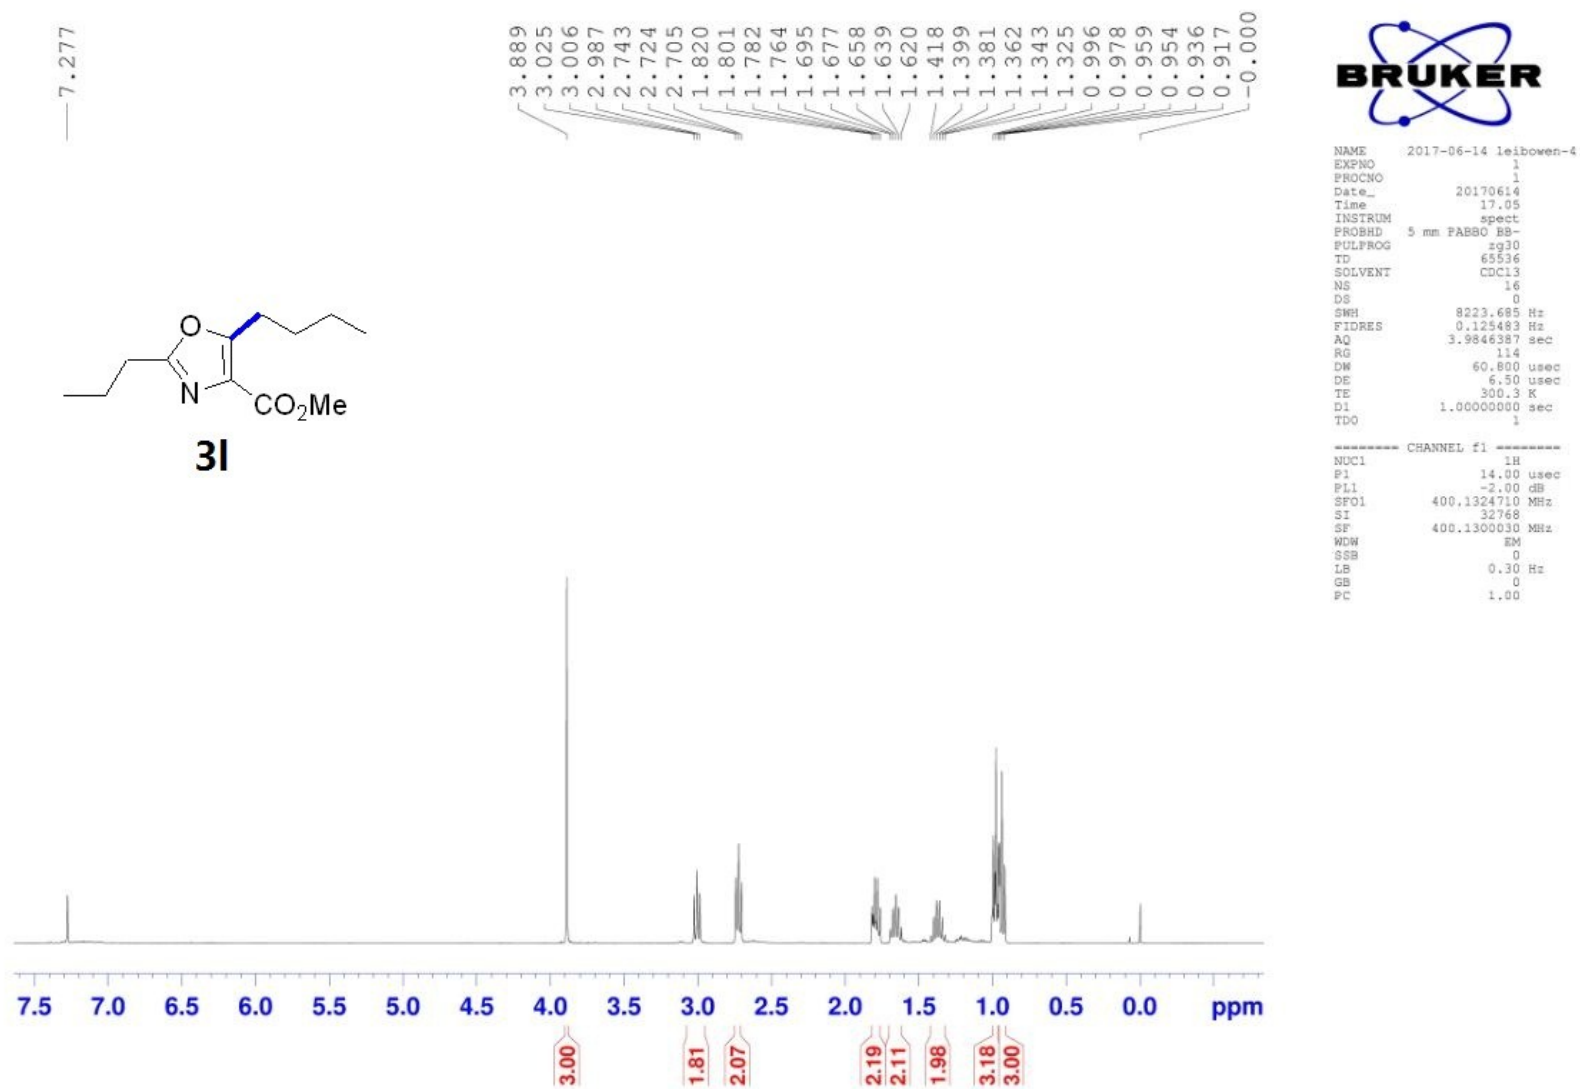

# Electronic Supplementary Information

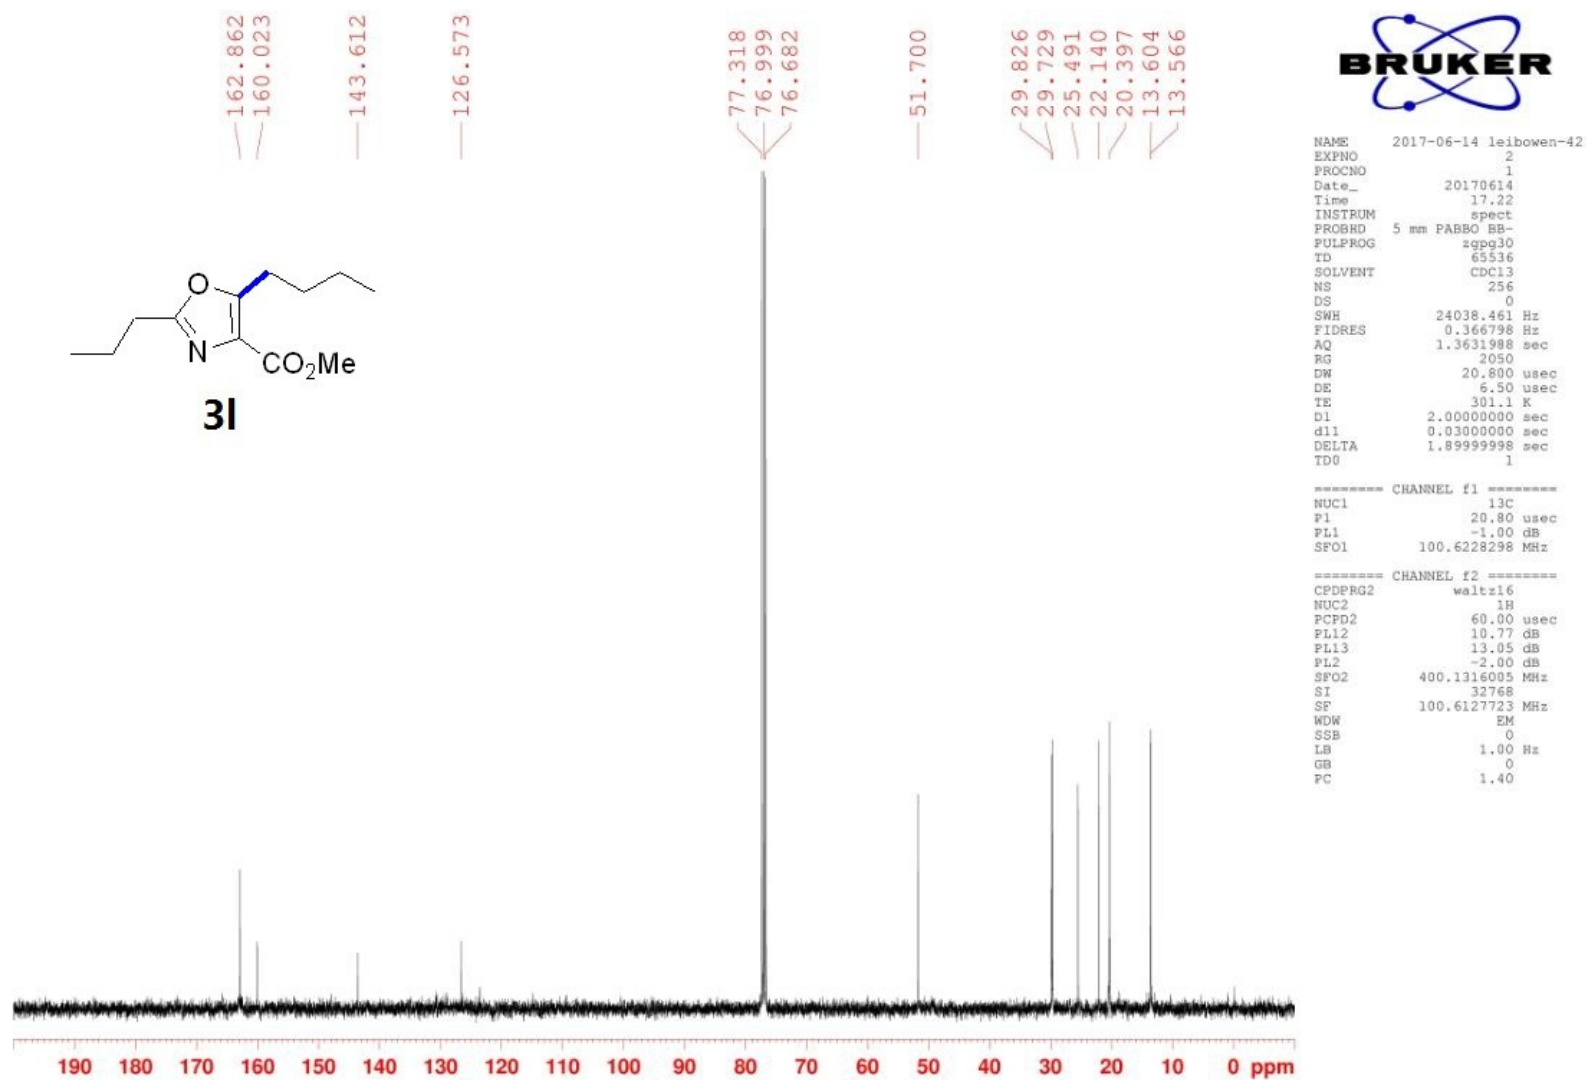

# Electronic Supplementary Information

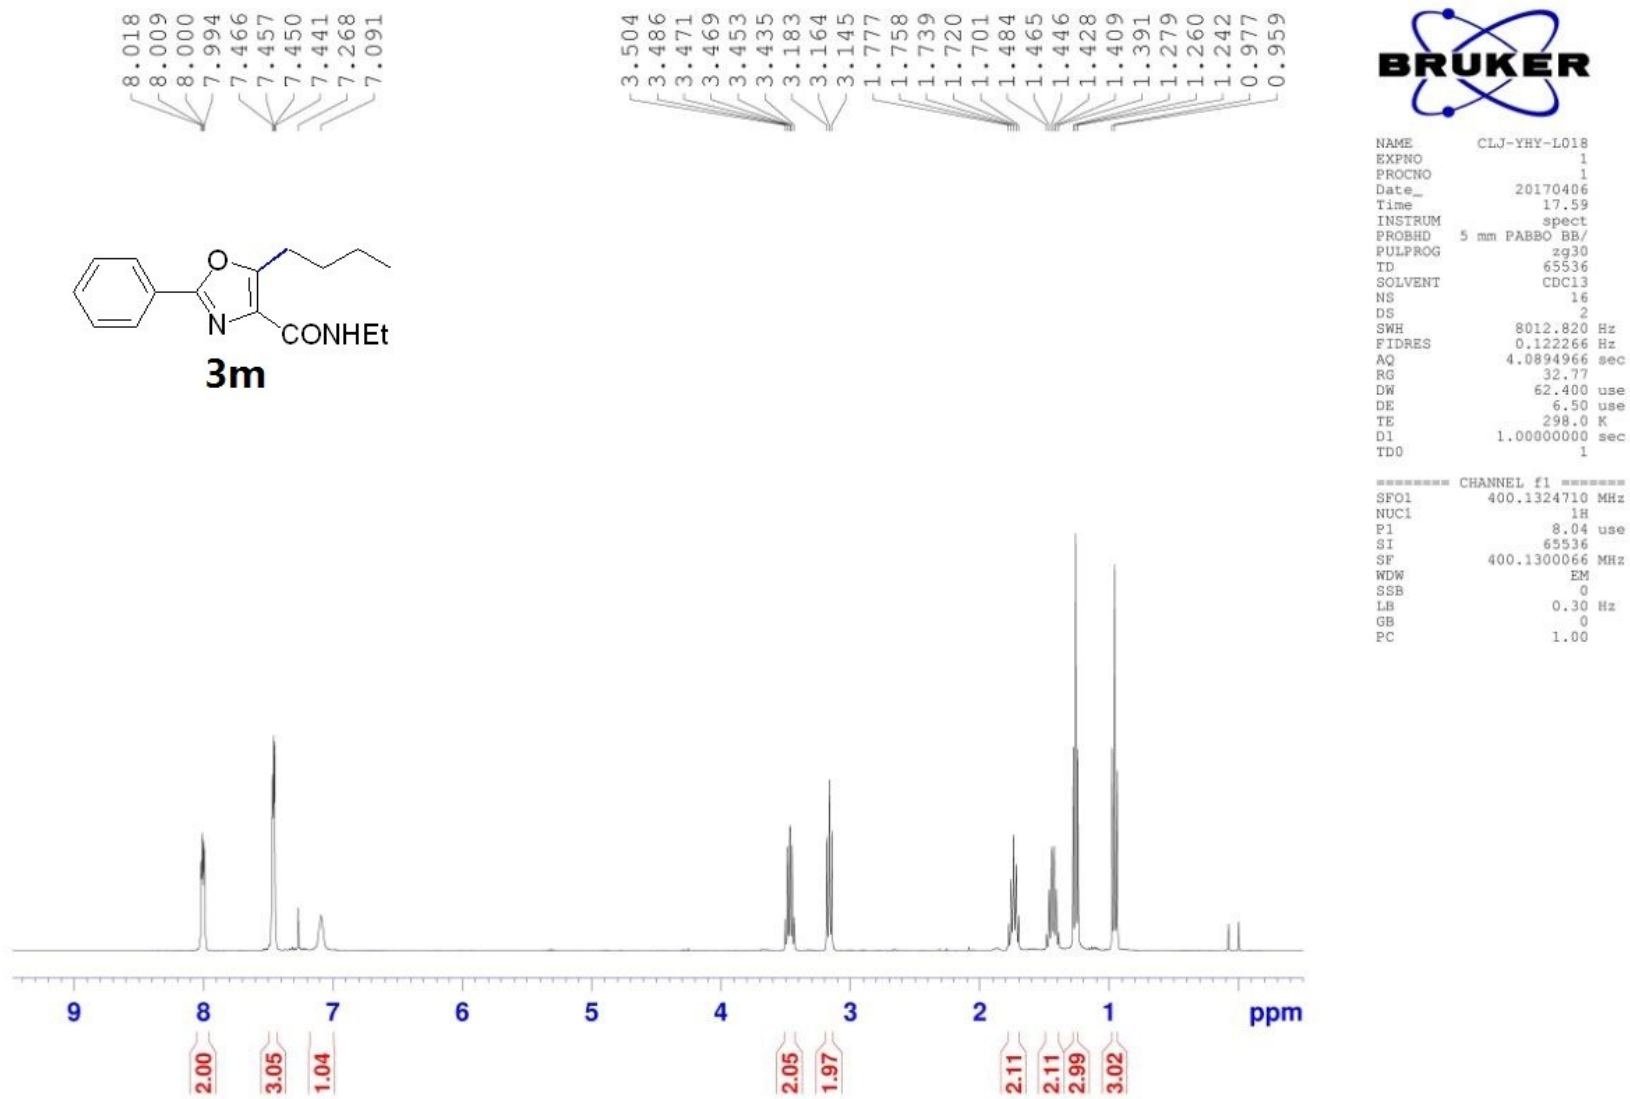

# Electronic Supplementary Information

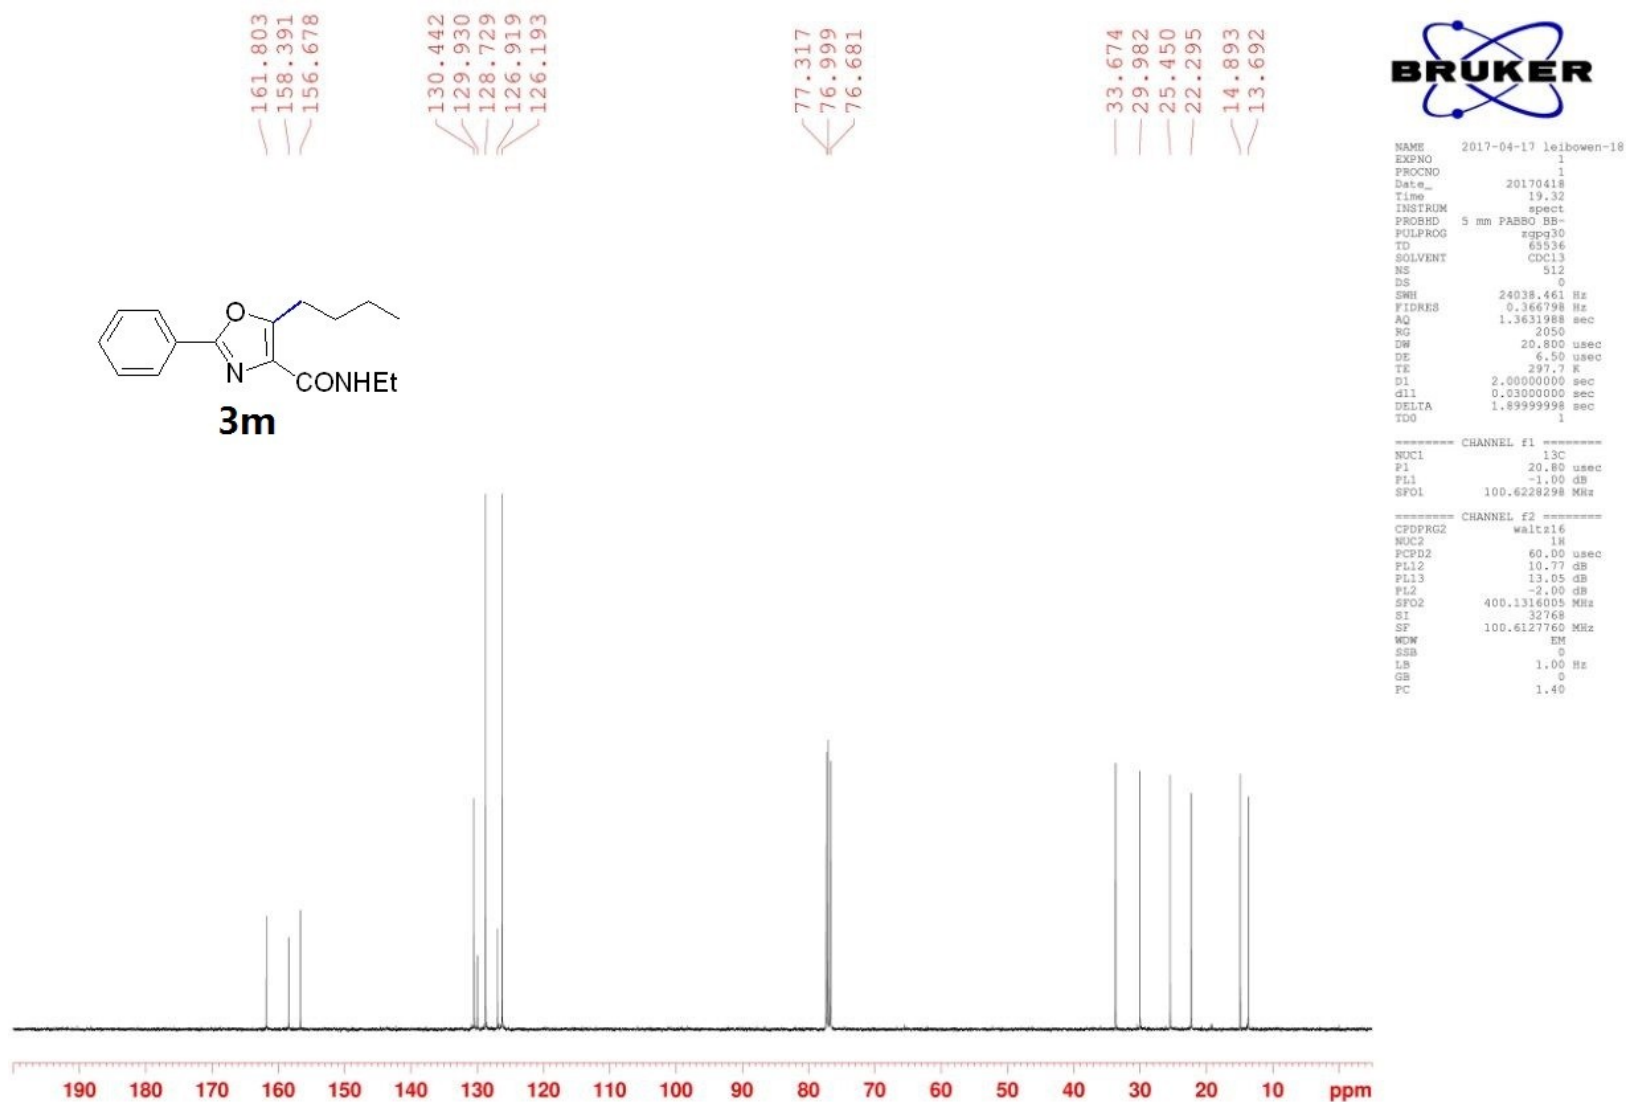

# Electronic Supplementary Information

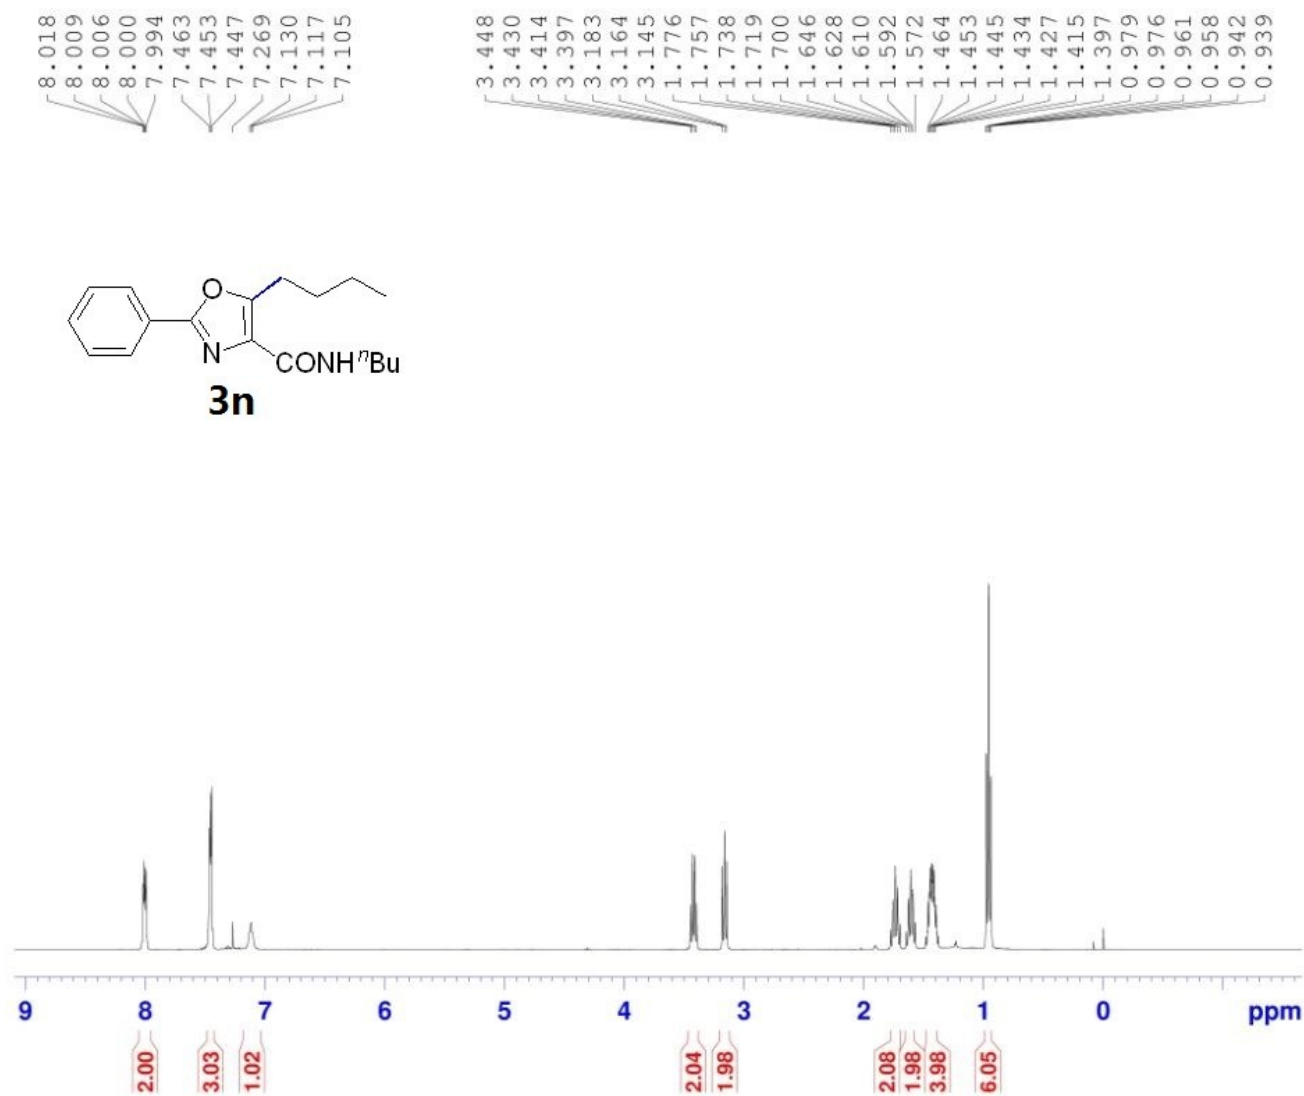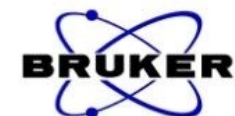

```

NAME      CLJ-YHY-L021
EXPNO     1
PROCNO    1
Date_     20170411
Time      16.46
INSTRUM   spect
PROBHD    5 mm PABBO BB/
PULPROG   zg30
TD        65536
SOLVENT   CDCl3
NS        16
DS        2
SWH       8012.820 Hz
FIDRES    0.122266 Hz
AQ        4.0894966 sec
RG        32.77
DW        62.400 use
DE        6.50 use
TE        298.0 K
D1        1.00000000 sec
TD0       1
  
```

```

===== CHANNEL f1 =====
SF01    400.1324710 MHz
NUC1     1H
P1       8.04 use
SI       65536
SF       400.1300057 MHz
WDW      EM
SSB      0
LB       0.30 Hz
GB       0
PC       1.00
  
```

# Electronic Supplementary Information

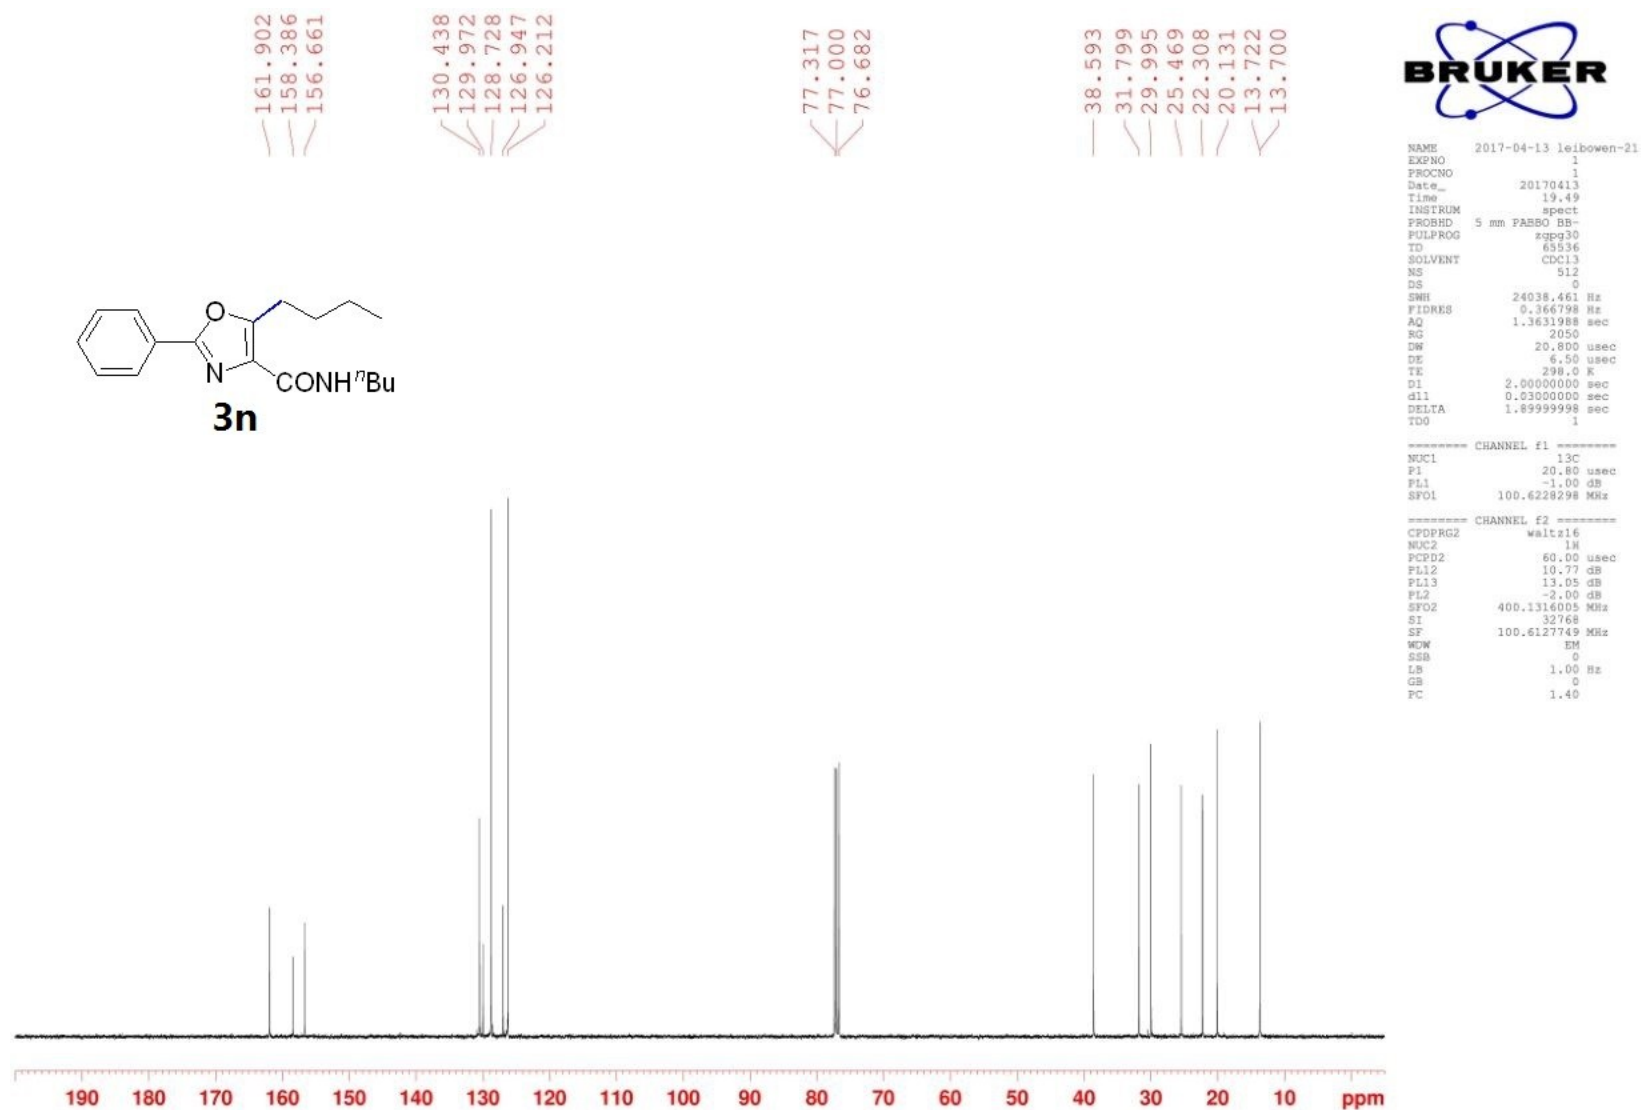

# Electronic Supplementary Information

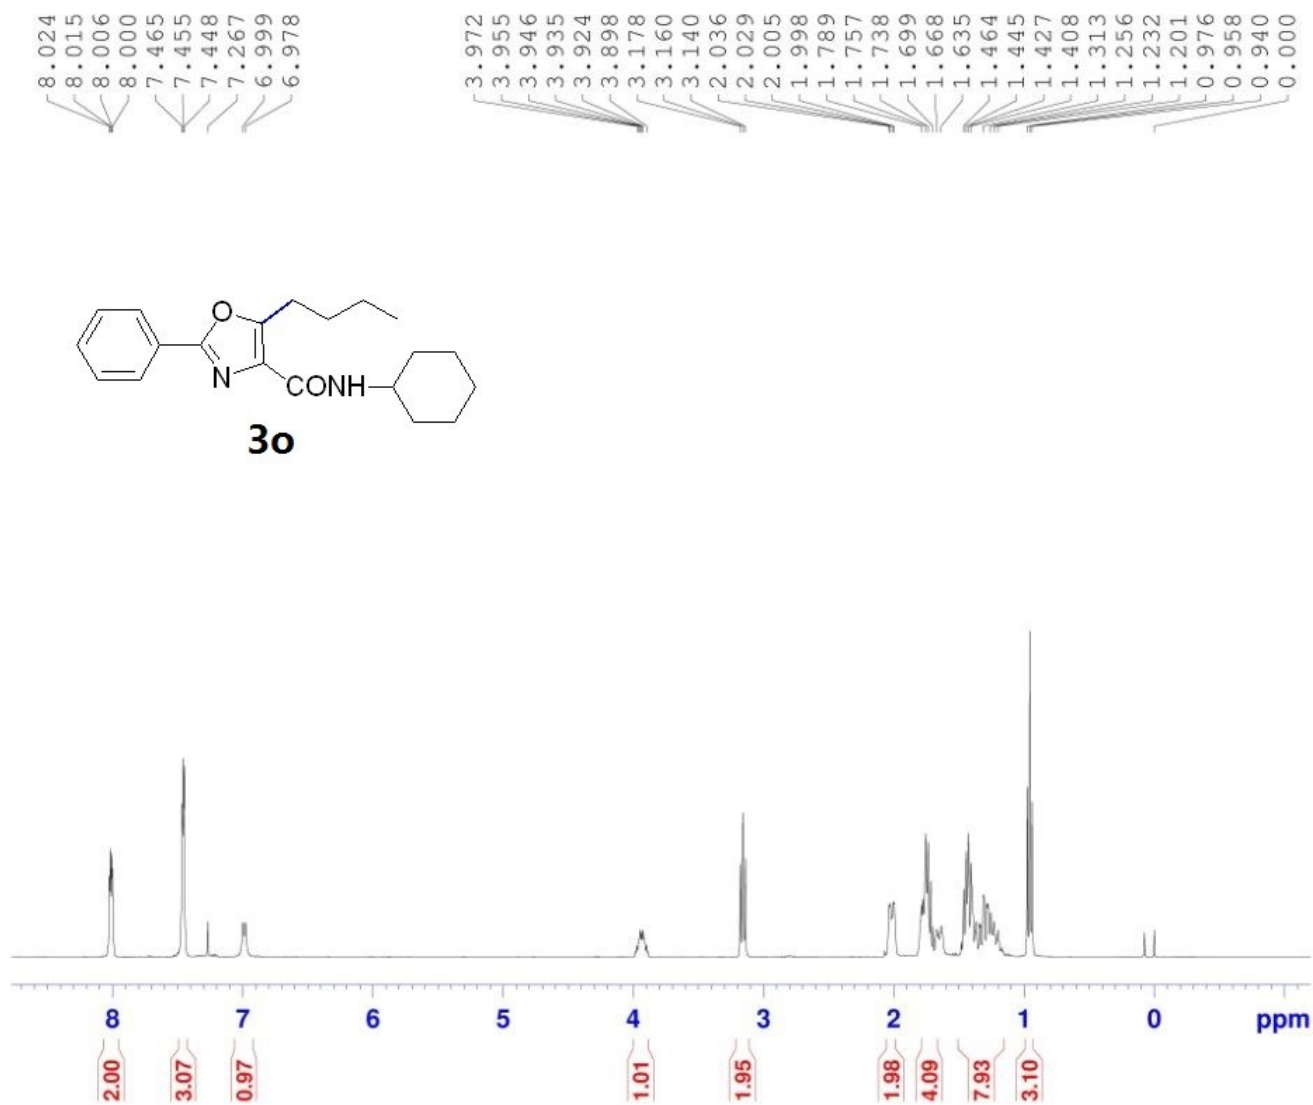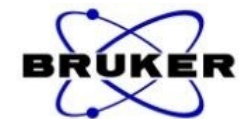

NAME CLJ-YHY-L019  
EXPNO 1  
PROCNO 1  
Date\_ 20170406  
Time 18.03  
INSTRUM spect  
PROBHD 5 mm PABBO BB/  
PULPROG zg30  
TD 65536  
SOLVENT CDCl<sub>3</sub>  
NS 16  
DS 2  
SWH 8012.820 Hz  
FIDRES 0.122266 Hz  
AQ 4.0894966 sec  
RG 32.77  
DW 62.400 use  
DE 6.50 use  
TE 298.0 K  
D1 1.00000000 sec  
TD0 1

===== CHANNEL f1 =====  
SF01 400.1324710 MHz  
NUC1 1H  
P1 8.04 use  
SI 65536  
SF 400.1300067 MHz  
NDW EM  
SSB 0  
LB 0.30 Hz  
GB 0  
PC 1.00

# Electronic Supplementary Information

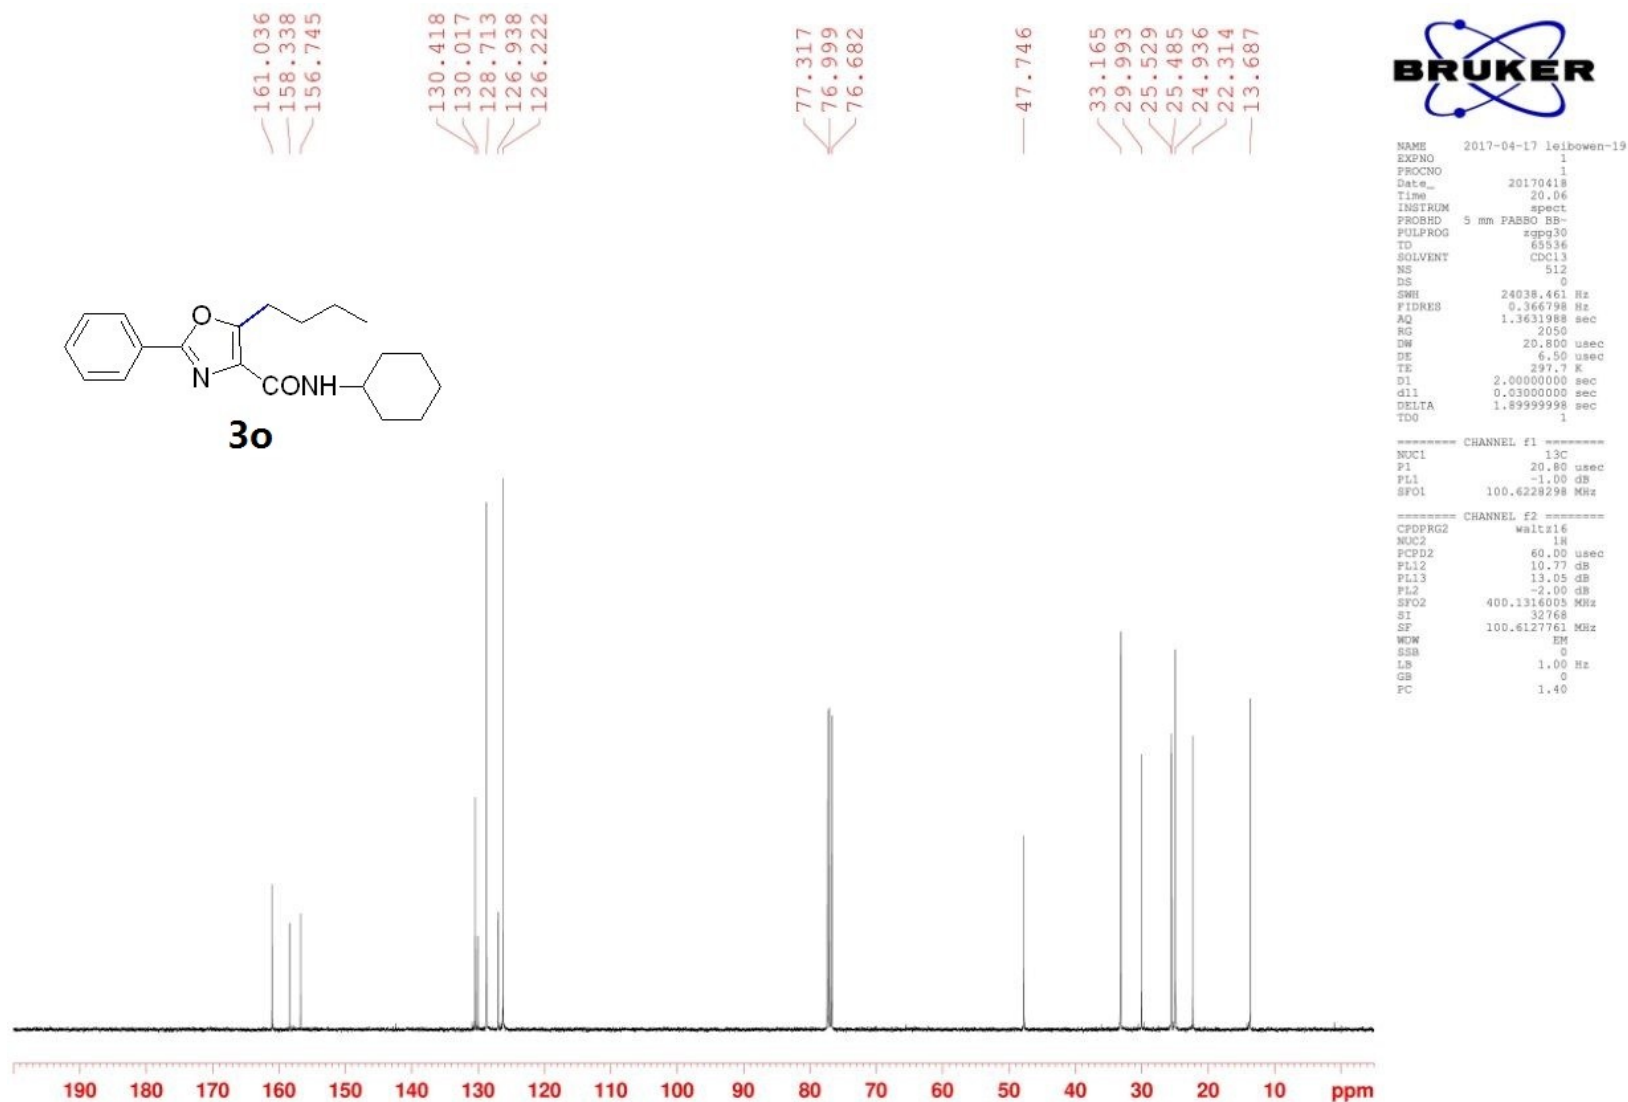

# Electronic Supplementary Information

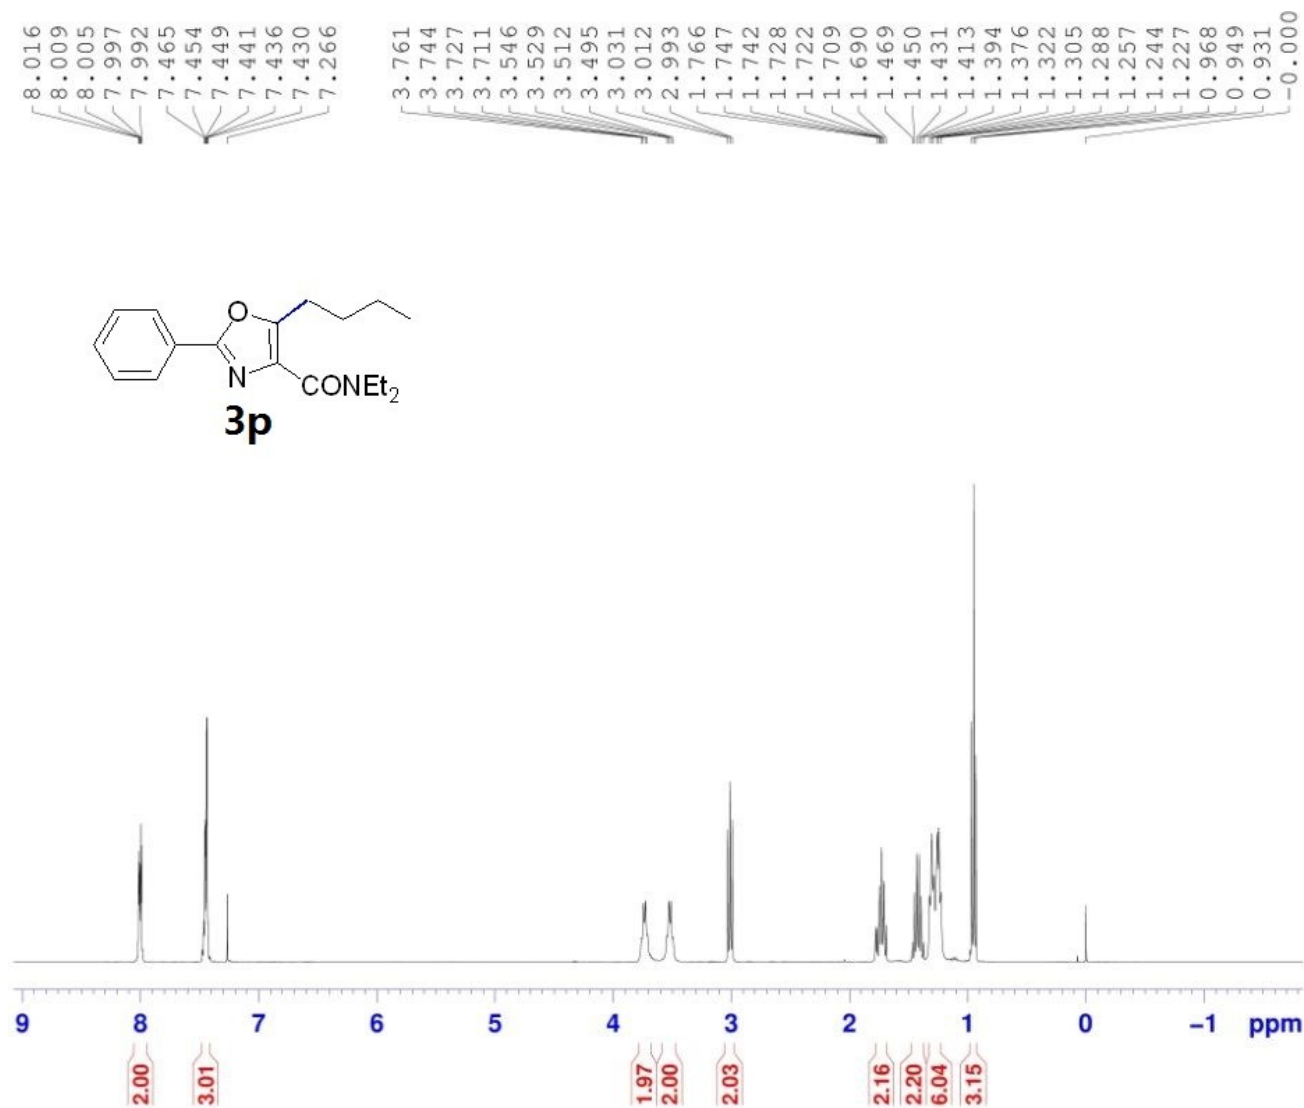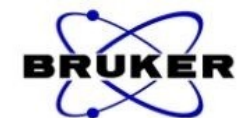

```

NAME      2017-04-17 leibowen-2
EXPNO     1
PROCNO    1
Date_     20170418
Time      21.26
INSTRUM   spect
PROBHD    5 mm PABBO BB-
PULPROG   zg30
TD         65536
SOLVENT   CDCl3
NS         16
DS         0
SWH        8223.685 Hz
FIDRES     0.125483 Hz
AQ         3.9846387 sec
RG         128
DW         60.800 usec
DE         6.50 usec
TE         298.0 K
D1         1.00000000 sec
TDO        1
  
```

```

----- CHANNEL f1 -----
NUC1      1H
P1         14.00 usec
PL1        -2.00 dB
SFO1      400.1324710 MHz
SI         32768
SF         400.1300070 MHz
WDW        EM
SSB        0
LB         0.30 Hz
GB         0
PC         1.00
  
```

# Electronic Supplementary Information

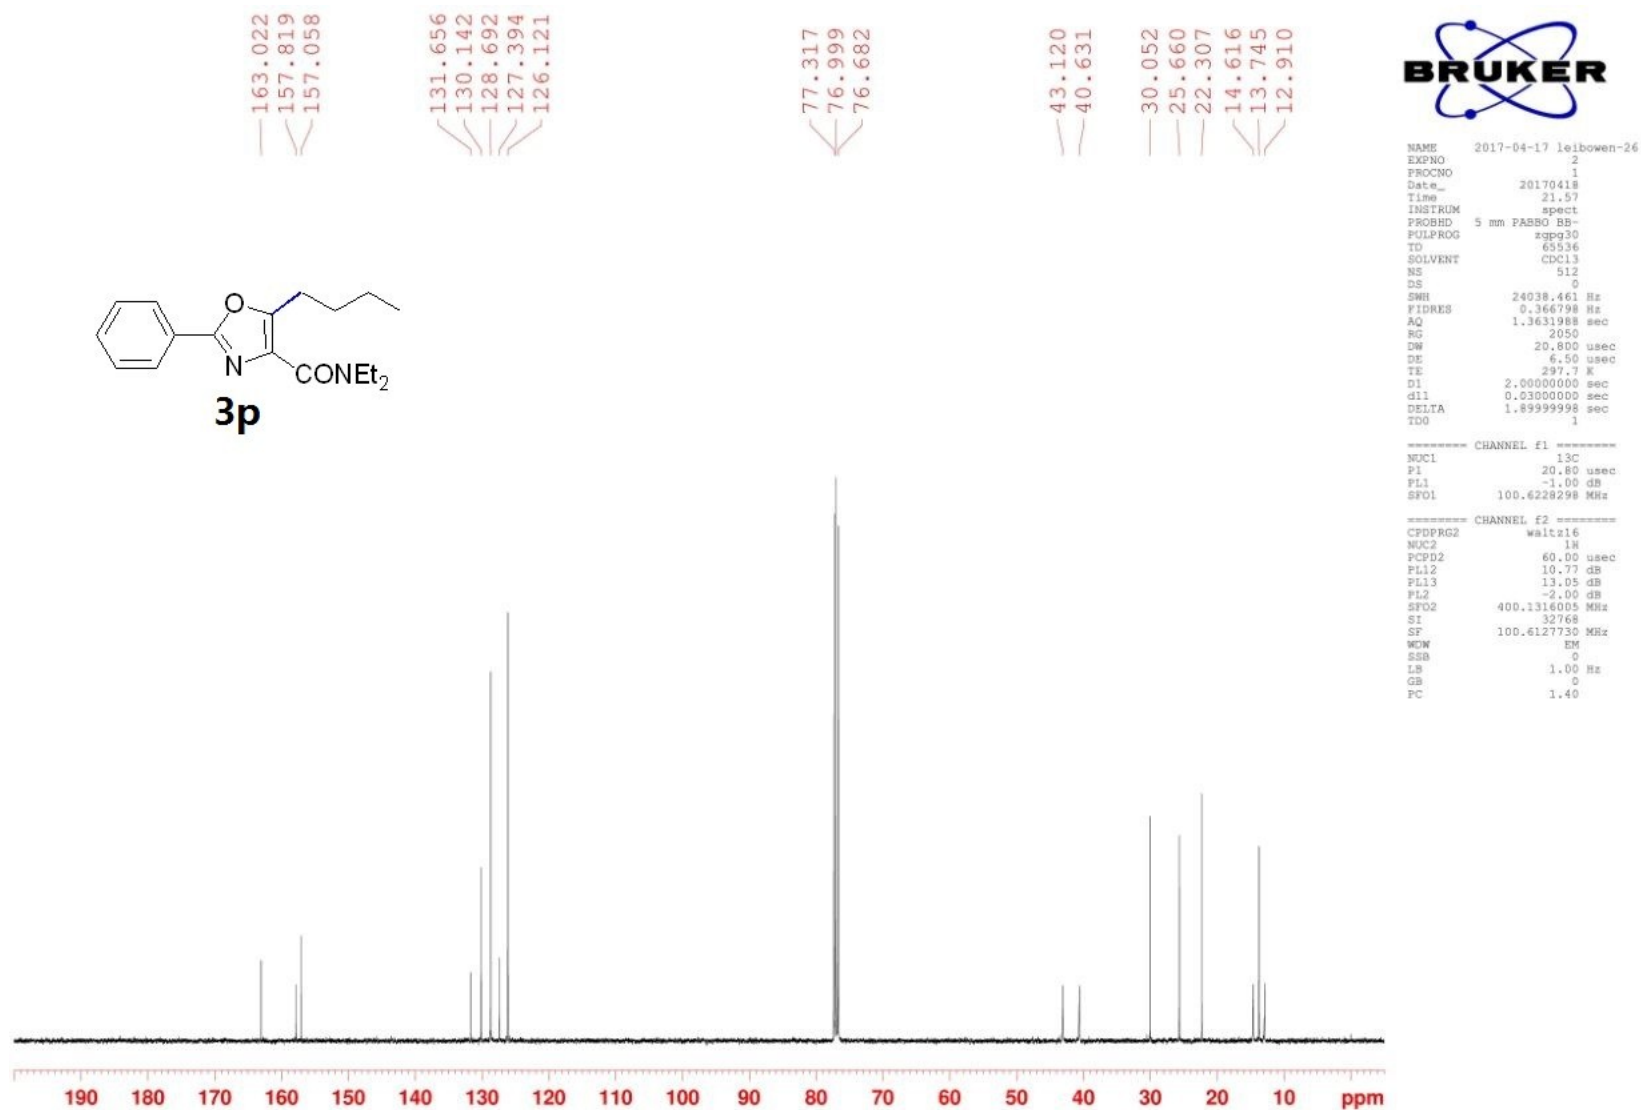

# Electronic Supplementary Information

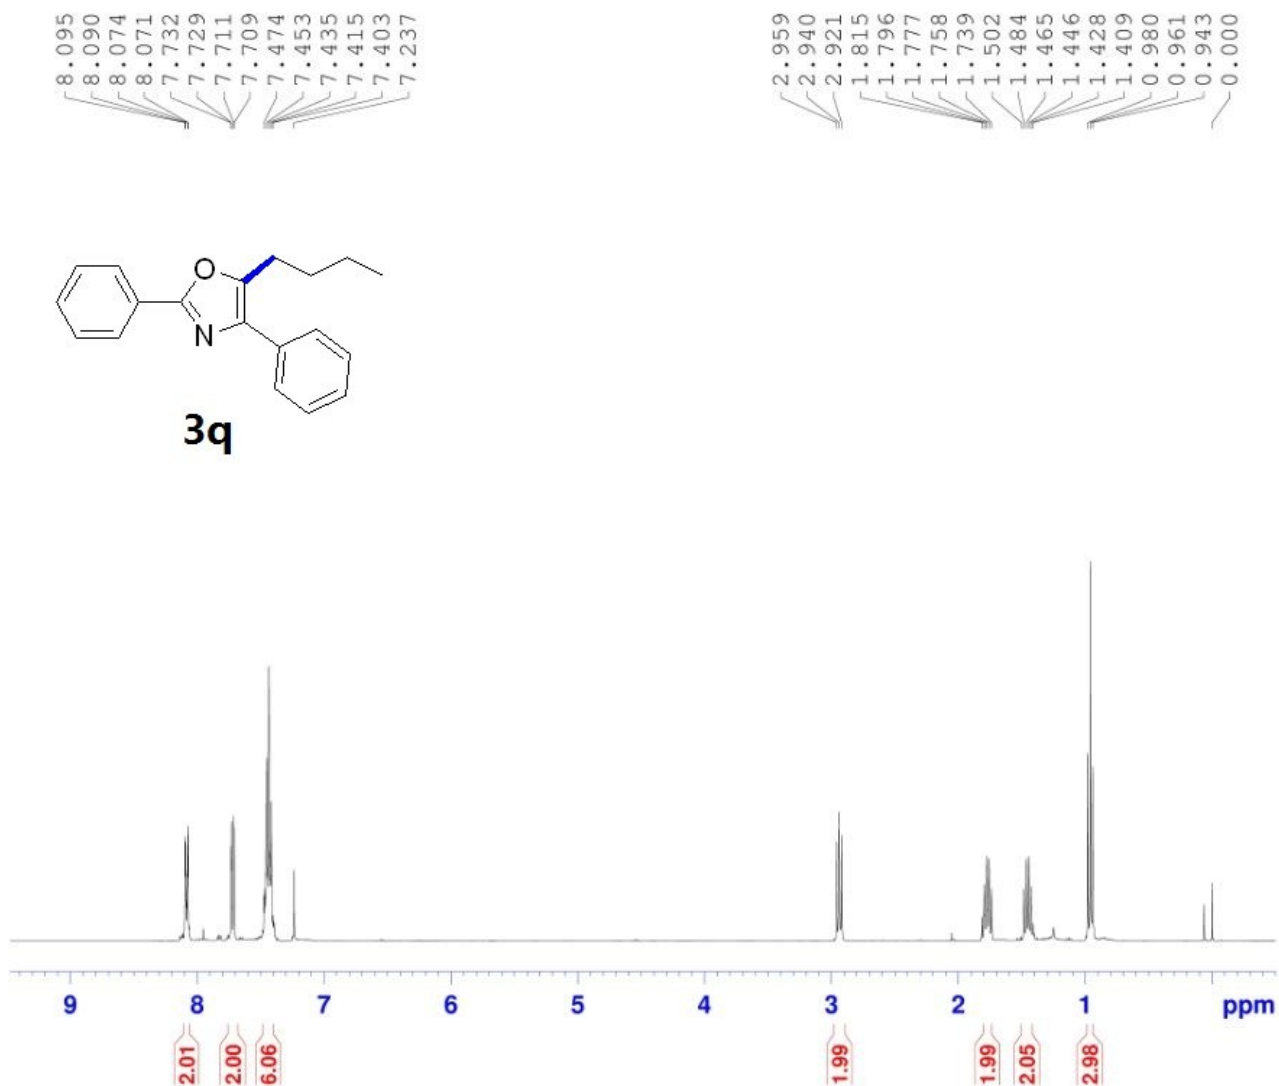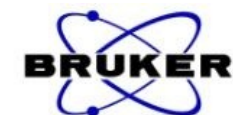

NAME CLJ-YHY-L044  
 EXPNO 1  
 PROCNO 1  
 Date\_ 20170616  
 Time\_ 16.31  
 INSTRUM spect  
 PROBHD 5 mm PABBO BB/  
 PULPROG zg30  
 TD 65536  
 SOLVENT CDCl3  
 NS 16  
 DS 2  
 SWH 8012.820 Hz  
 FIDRES 0.122266 Hz  
 AQ 4.0894966 sec  
 RG 32.77  
 DW 62.400 use  
 DE 6.50 use  
 TE 300.0 K  
 D1 1.00000000 sec  
 TD0 1

===== CHANNEL f1 =====  
 SFO1 400.1324710 MHz  
 NUC1 1H  
 P1 8.04 use  
 SI 65536  
 SF 400.1300186 MHz  
 WDW EM  
 SSB 0  
 LB 0.30 Hz  
 GB 0  
 PC 1.00

# Electronic Supplementary Information

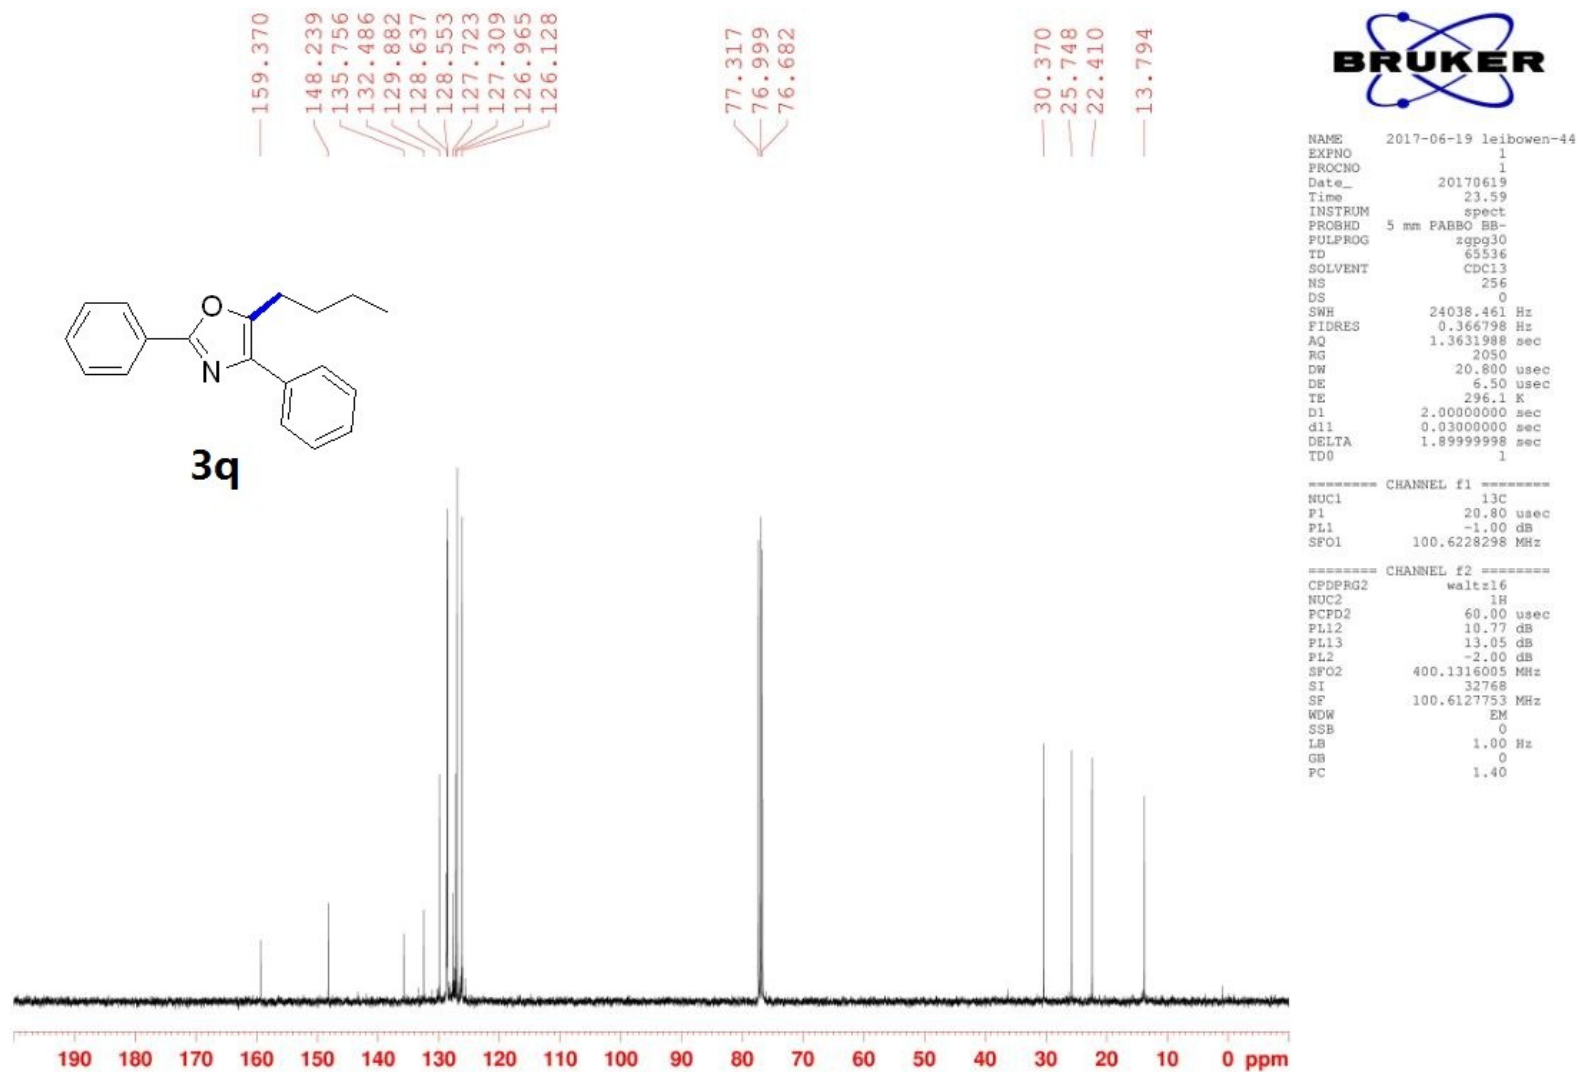

# Electronic Supplementary Information

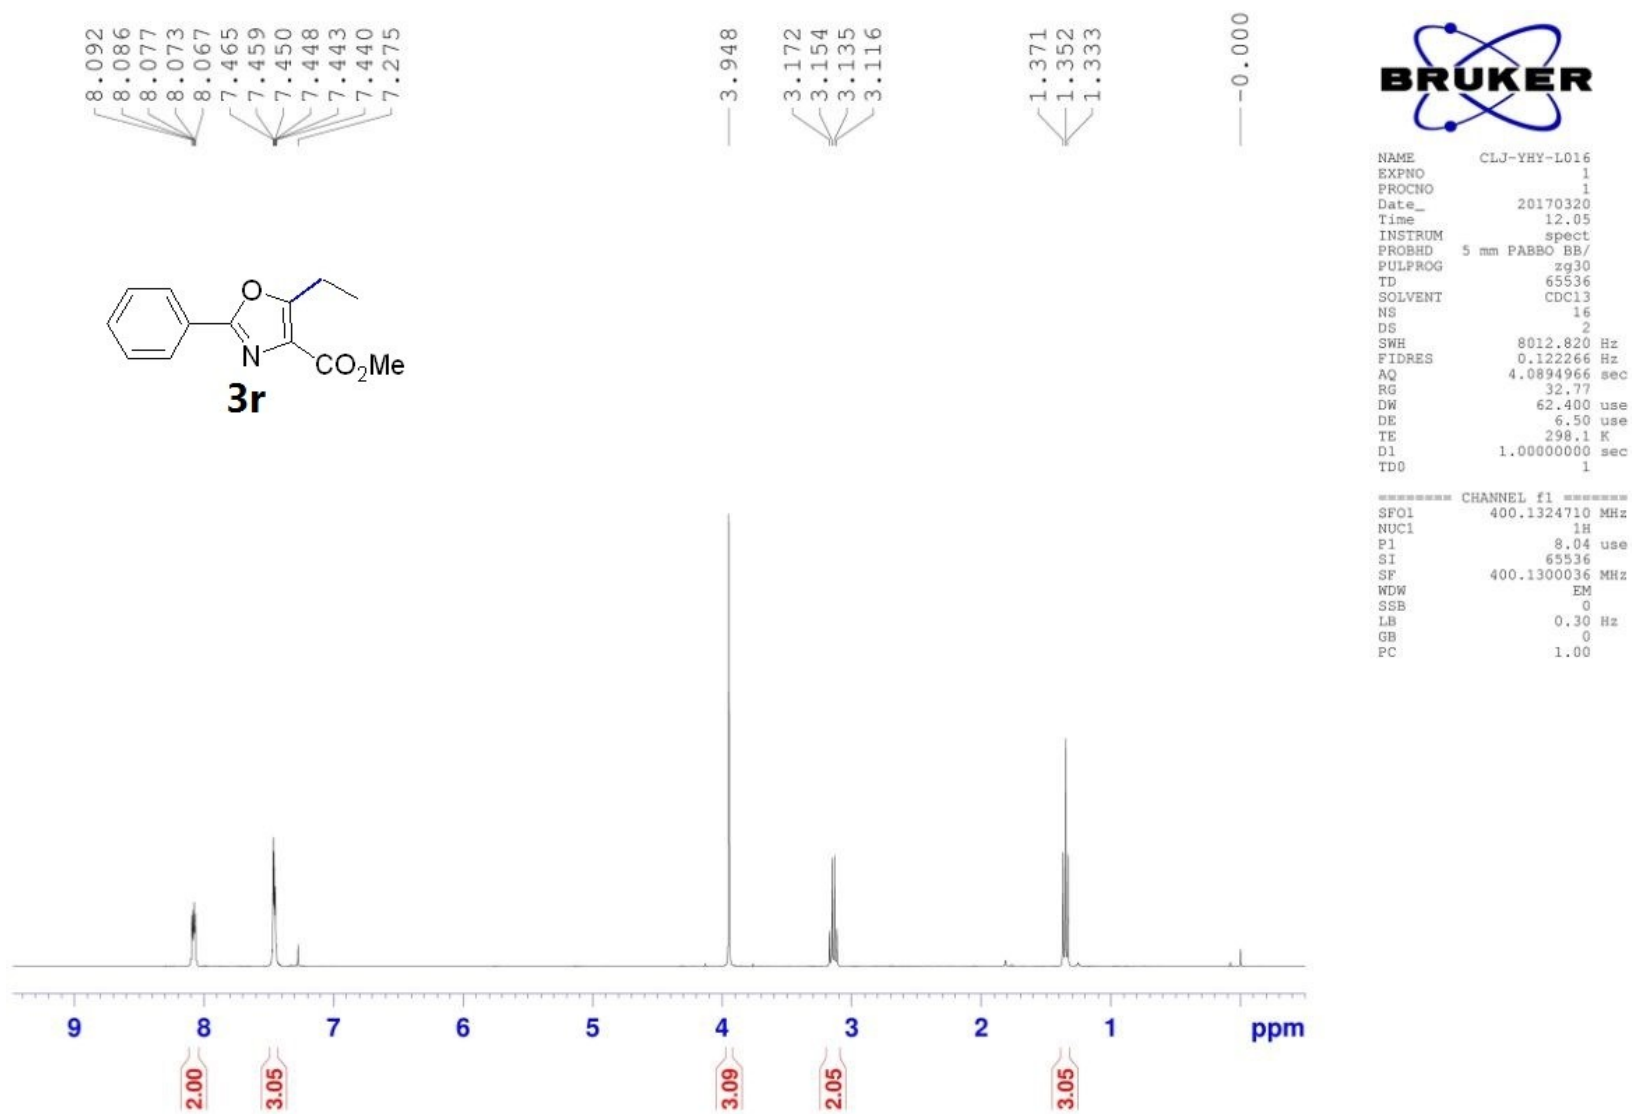

# Electronic Supplementary Information

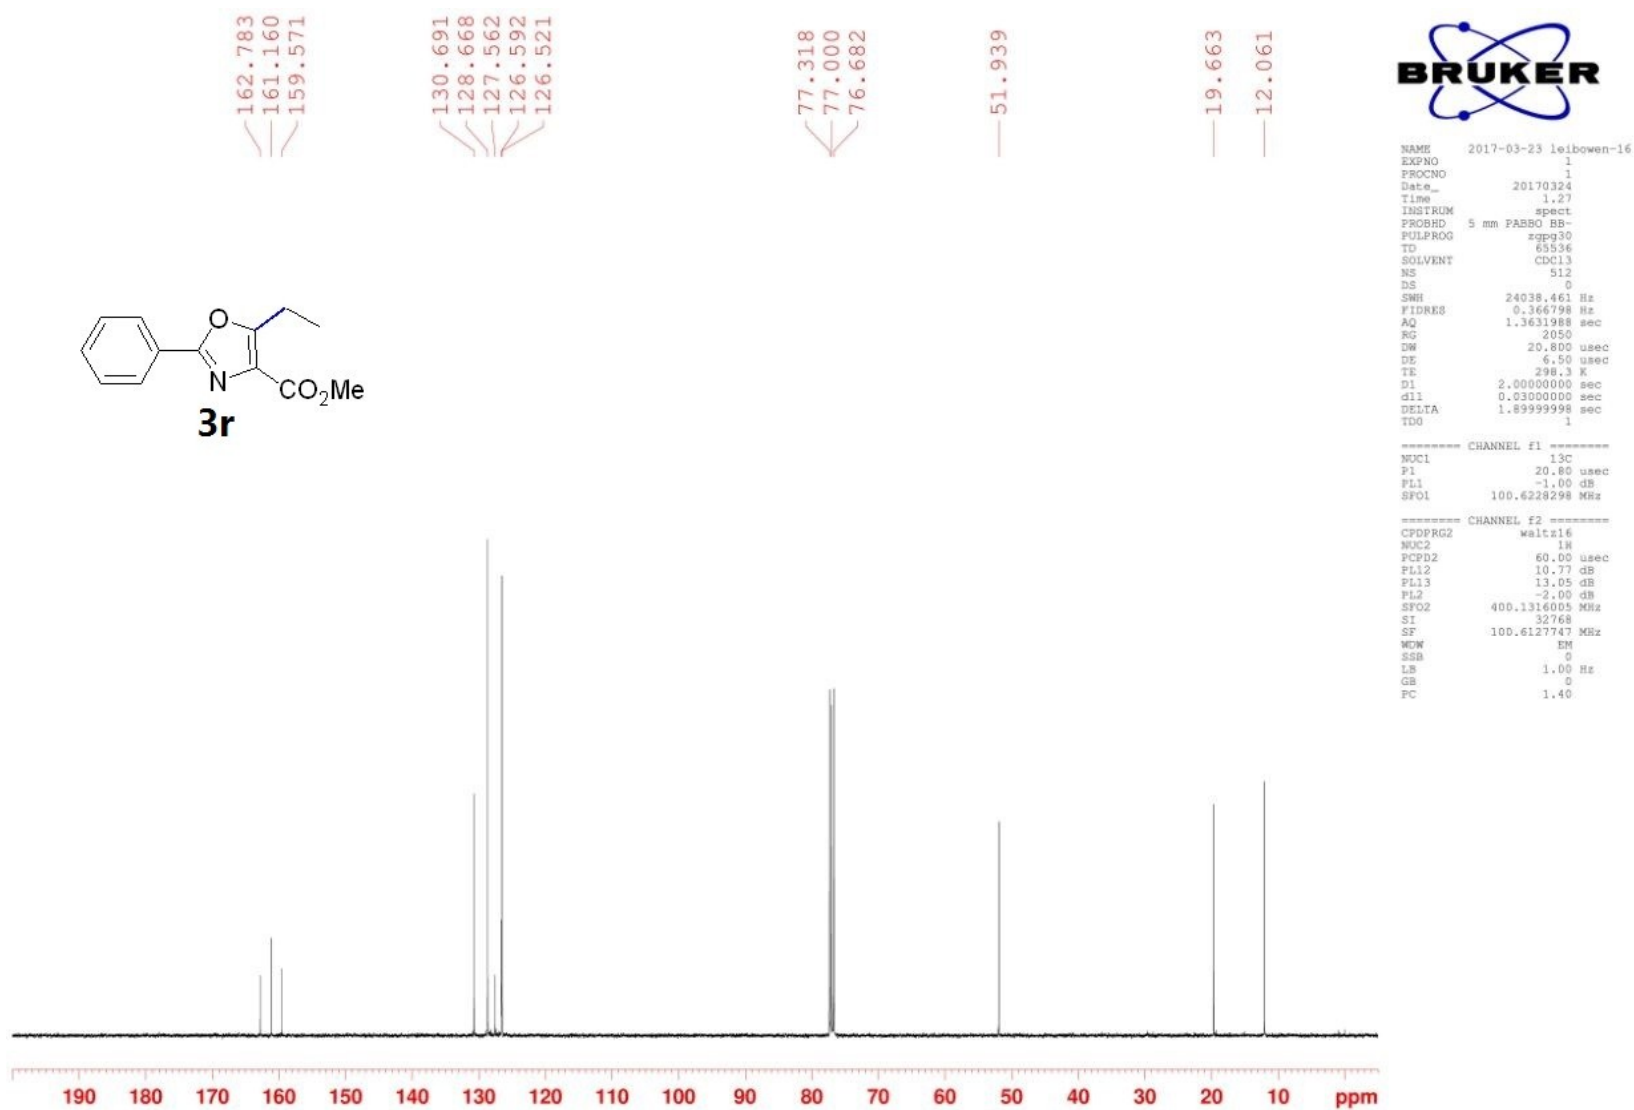

# Electronic Supplementary Information

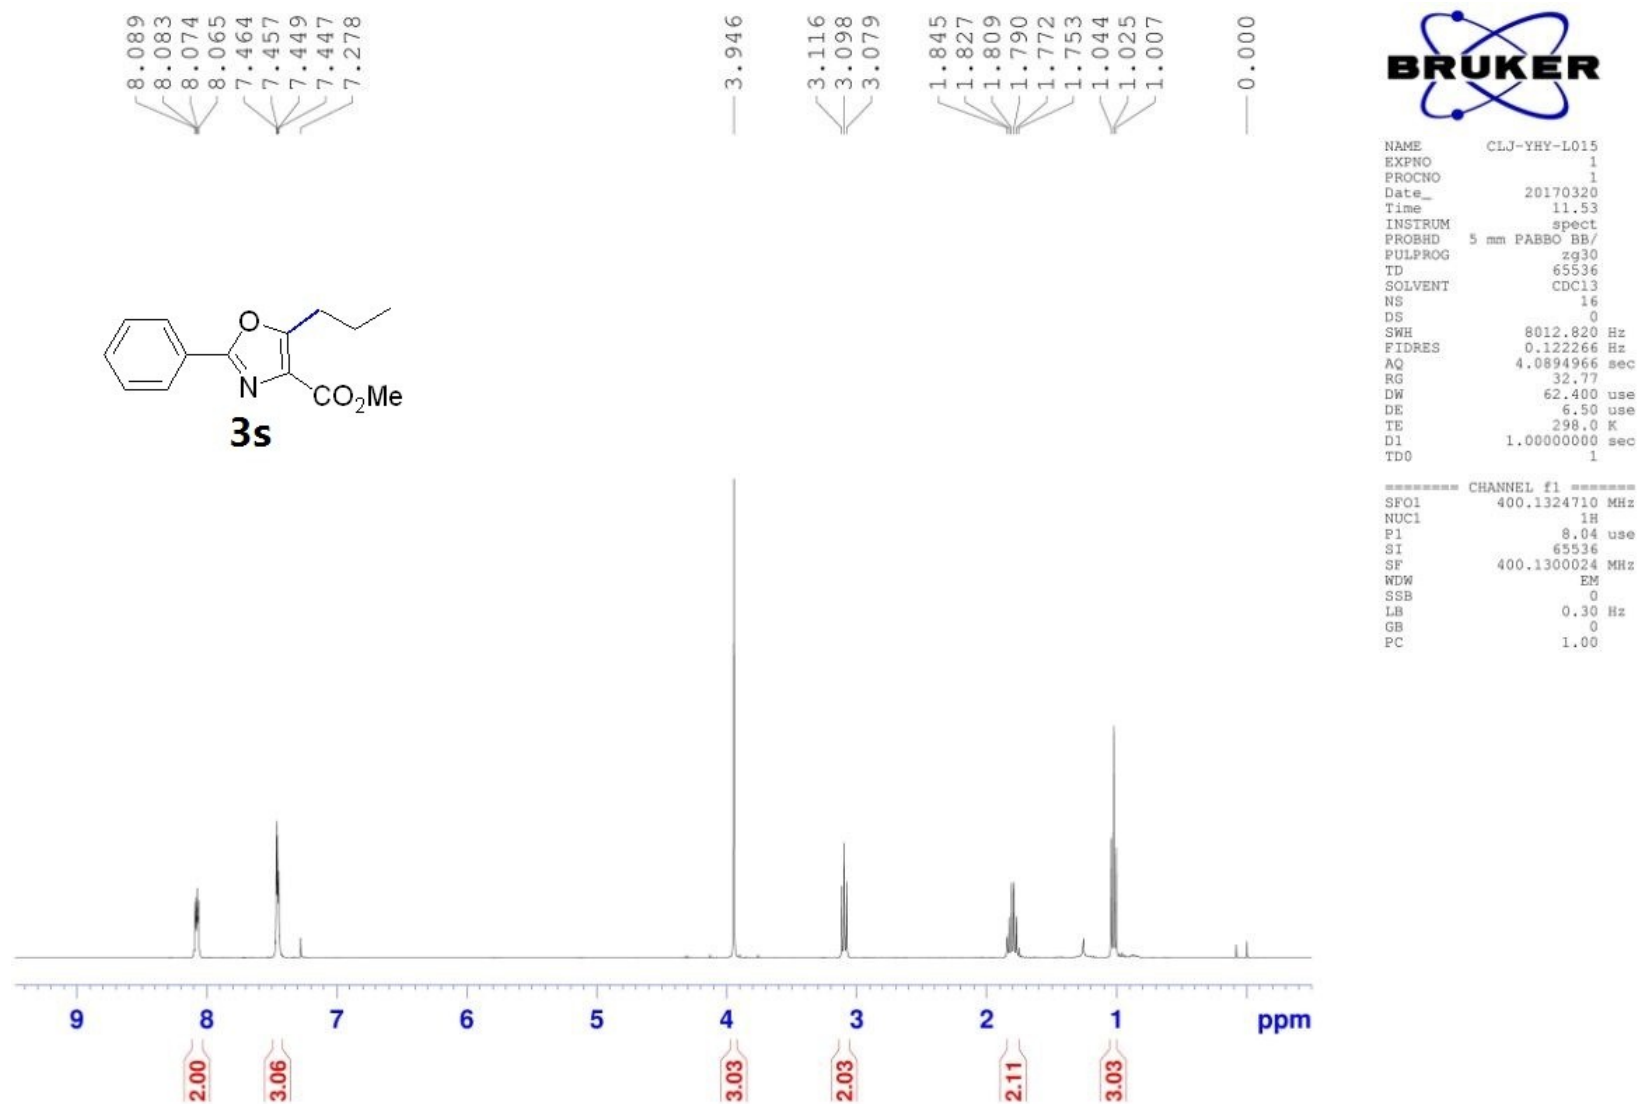

# Electronic Supplementary Information

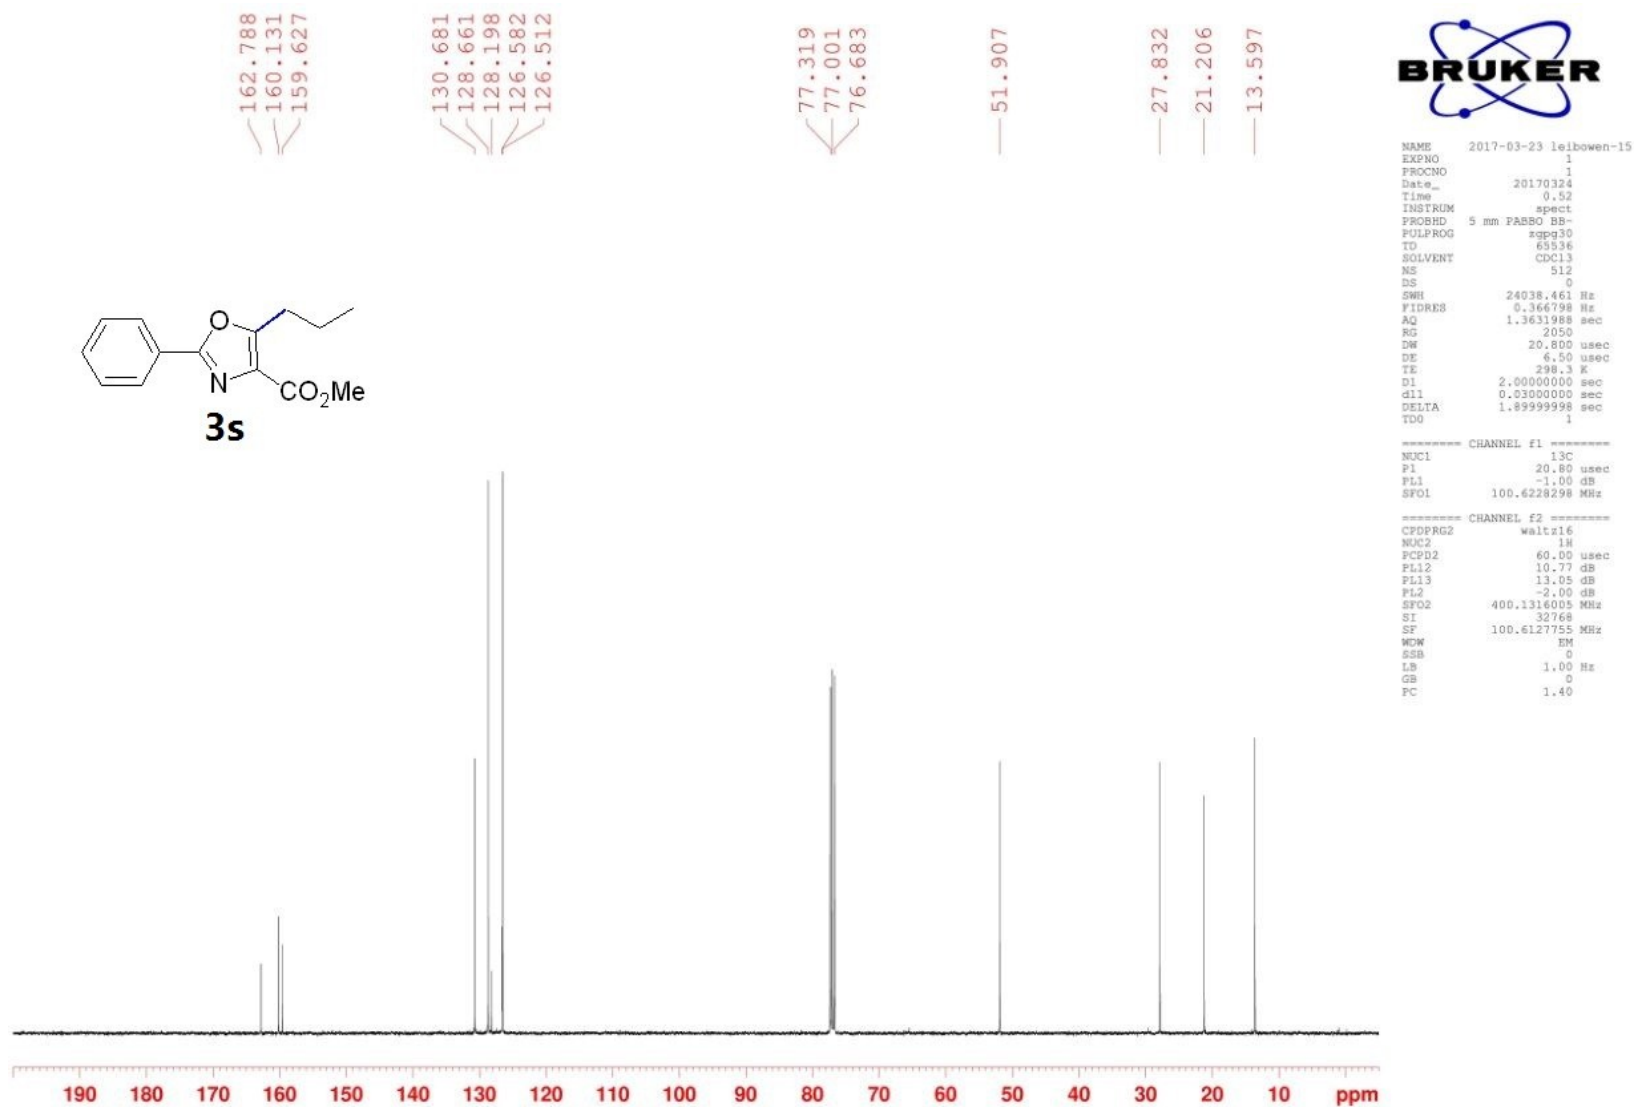

# Electronic Supplementary Information

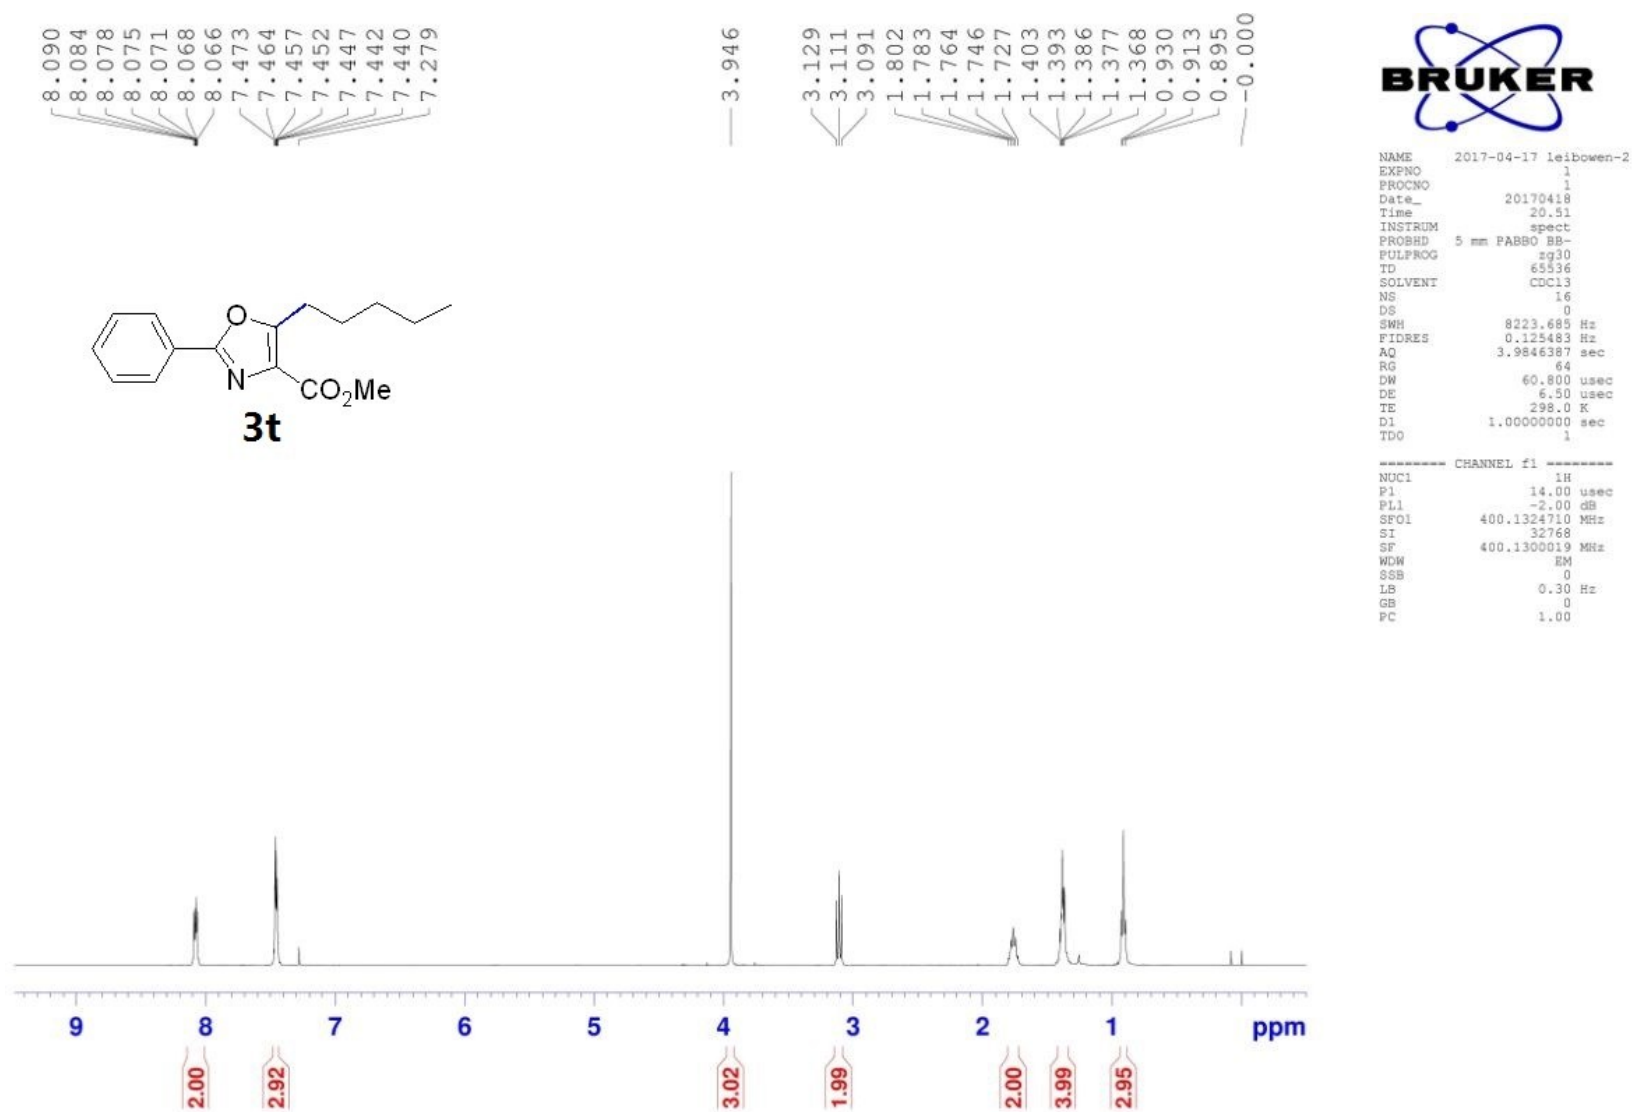

# Electronic Supplementary Information

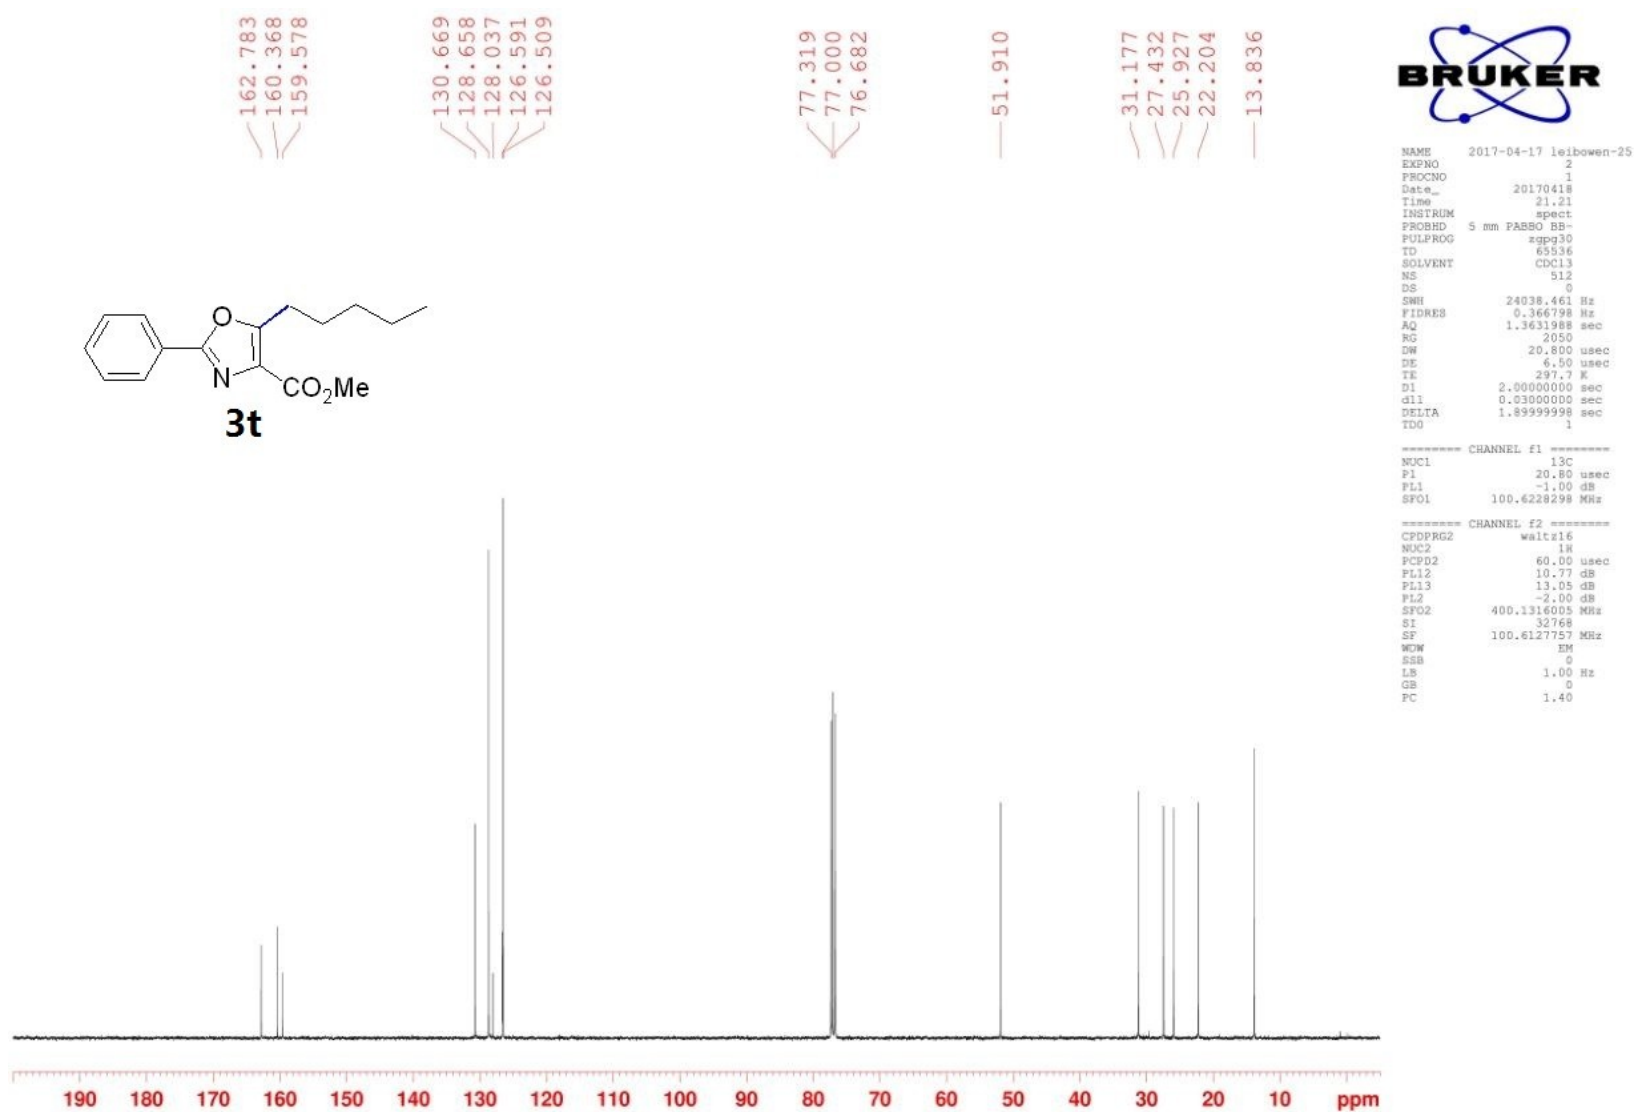

# Electronic Supplementary Information

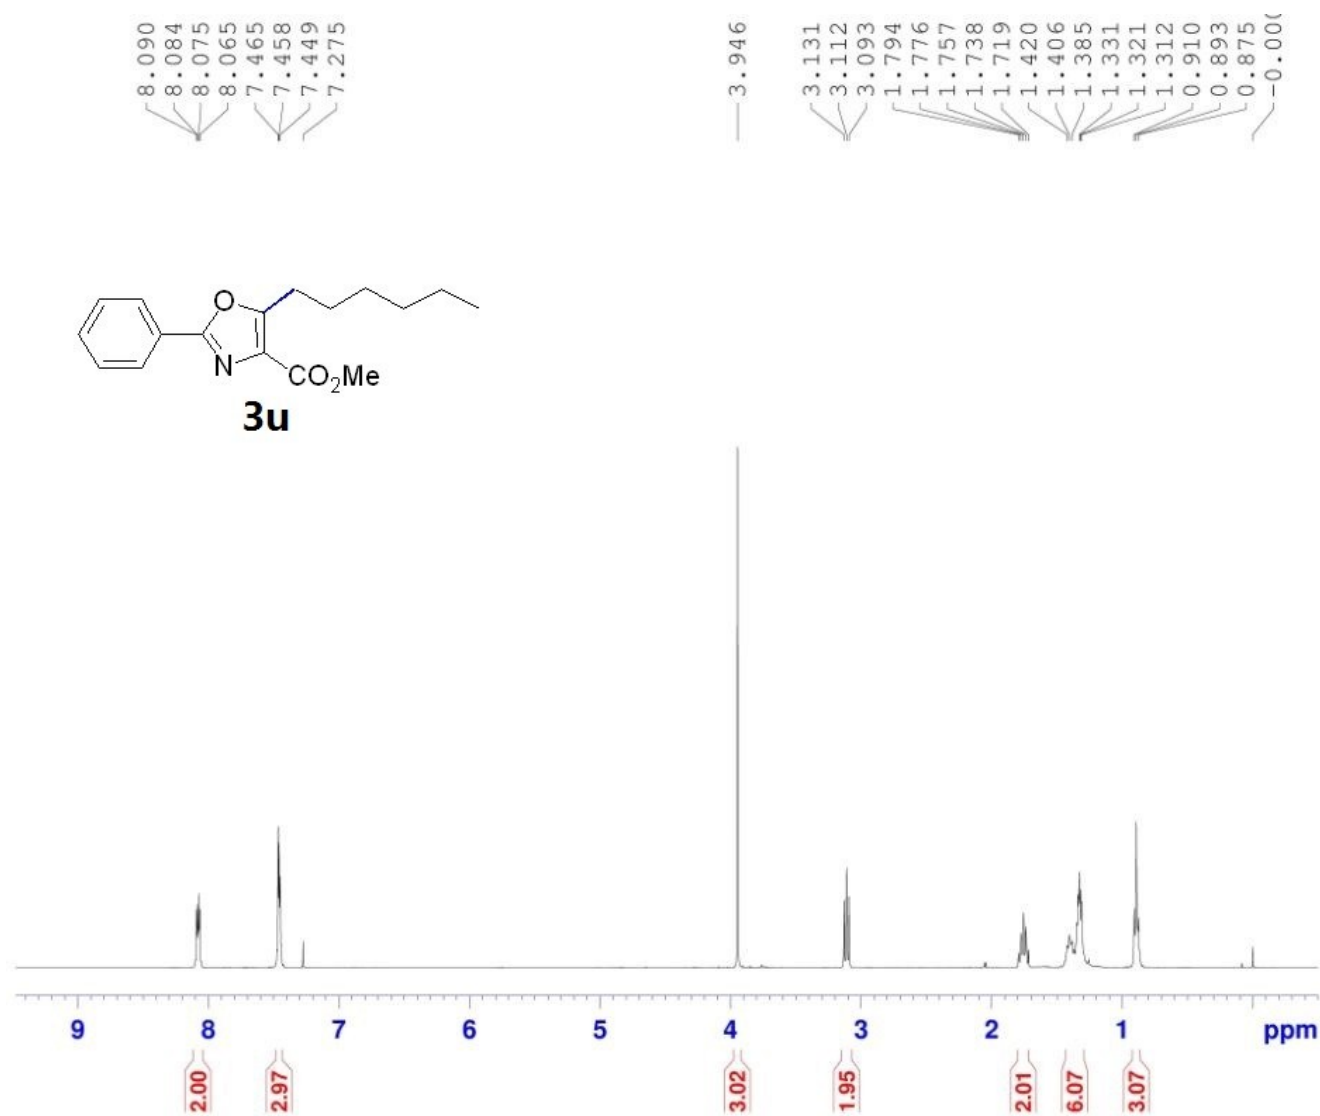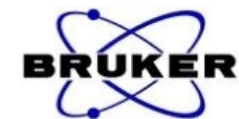

```

NAME      CLJ-YHY-L022
EXPNO     1
PROCNO    1
Date_     20170411
Time      16.50
INSTRUM   spect
PROBHD    5 mm PABBO BB/
PULPROG   zg30
TD        65536
SOLVENT   CDCl3
NS         16
DS         2
SWH        8012.820 Hz
FIDRES     0.122266 Hz
AQ         4.0894966 sec
RG         32.77
DW         62.400 use
DE         6.50 use
TE         298.0 K
D1         1.00000000 sec
TD0        1

===== CHANNEL f1 =====
SFO1      400.1324710 MHz
NUC1       1H
P1         8.04 use
SI         65536
SF         400.1300035 MHz
WDW        EM
SSB        0
LB         0.30 Hz
GB         0
PC         1.00
    
```

# Electronic Supplementary Information

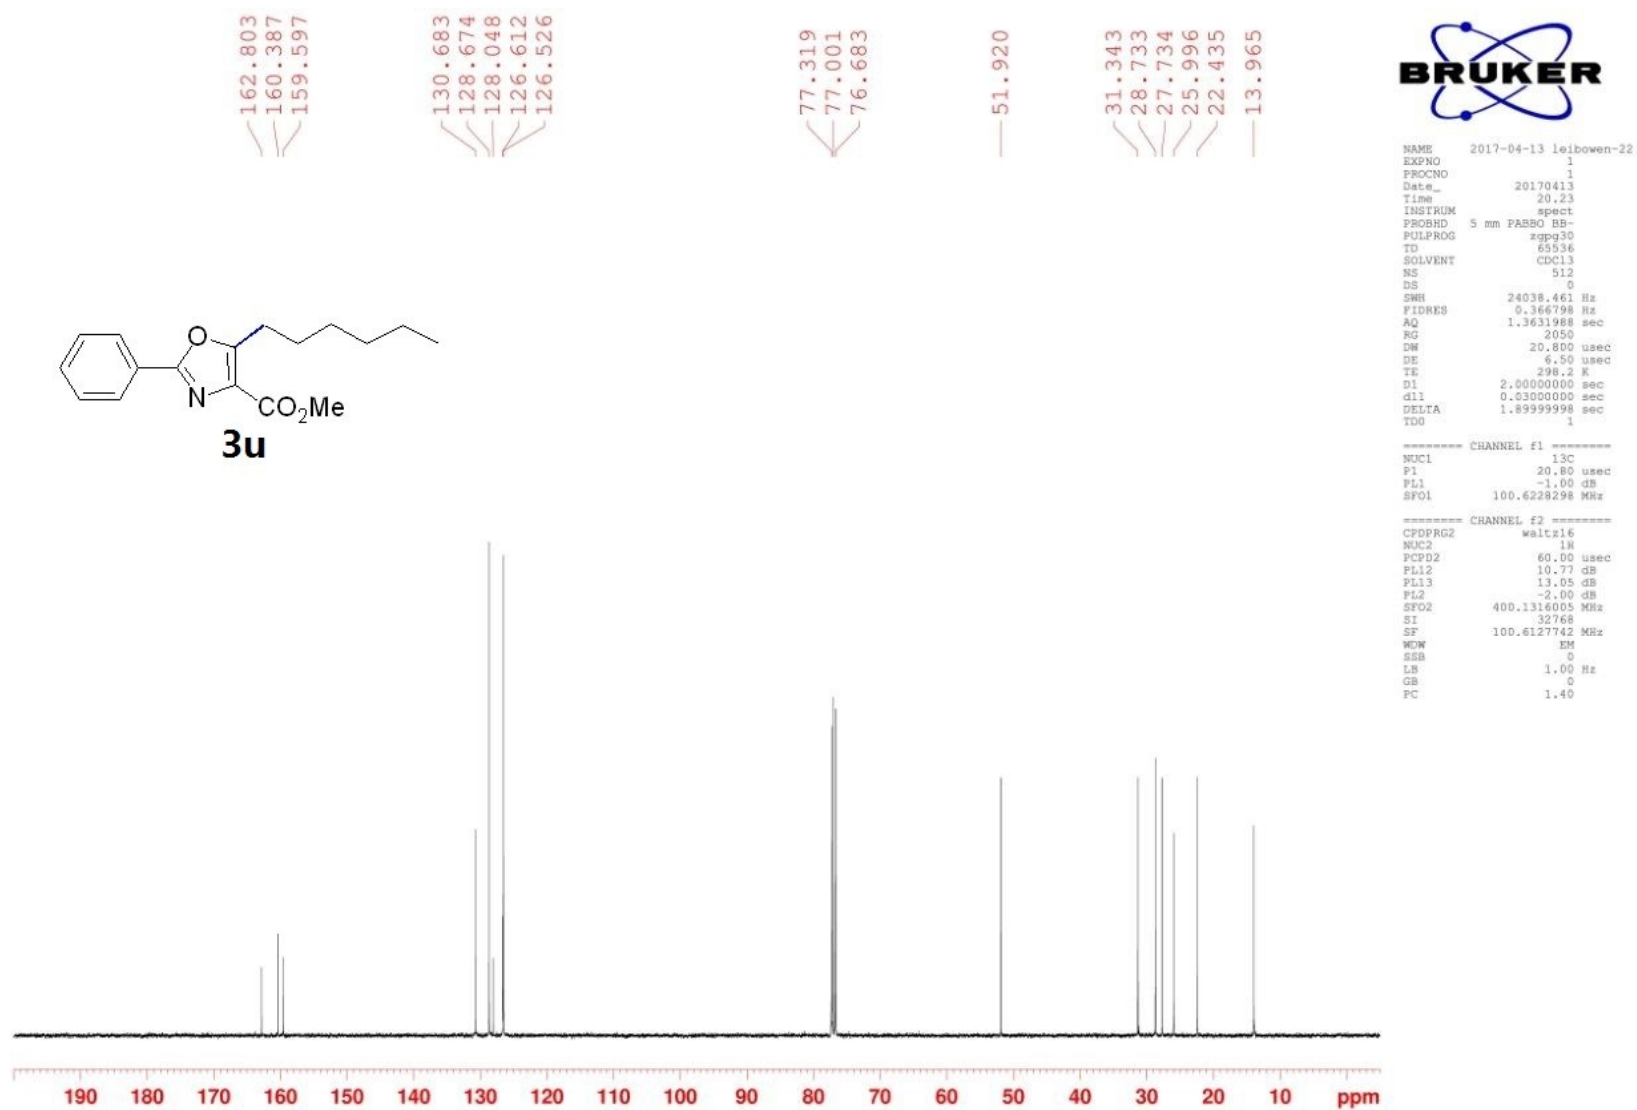

# Electronic Supplementary Information

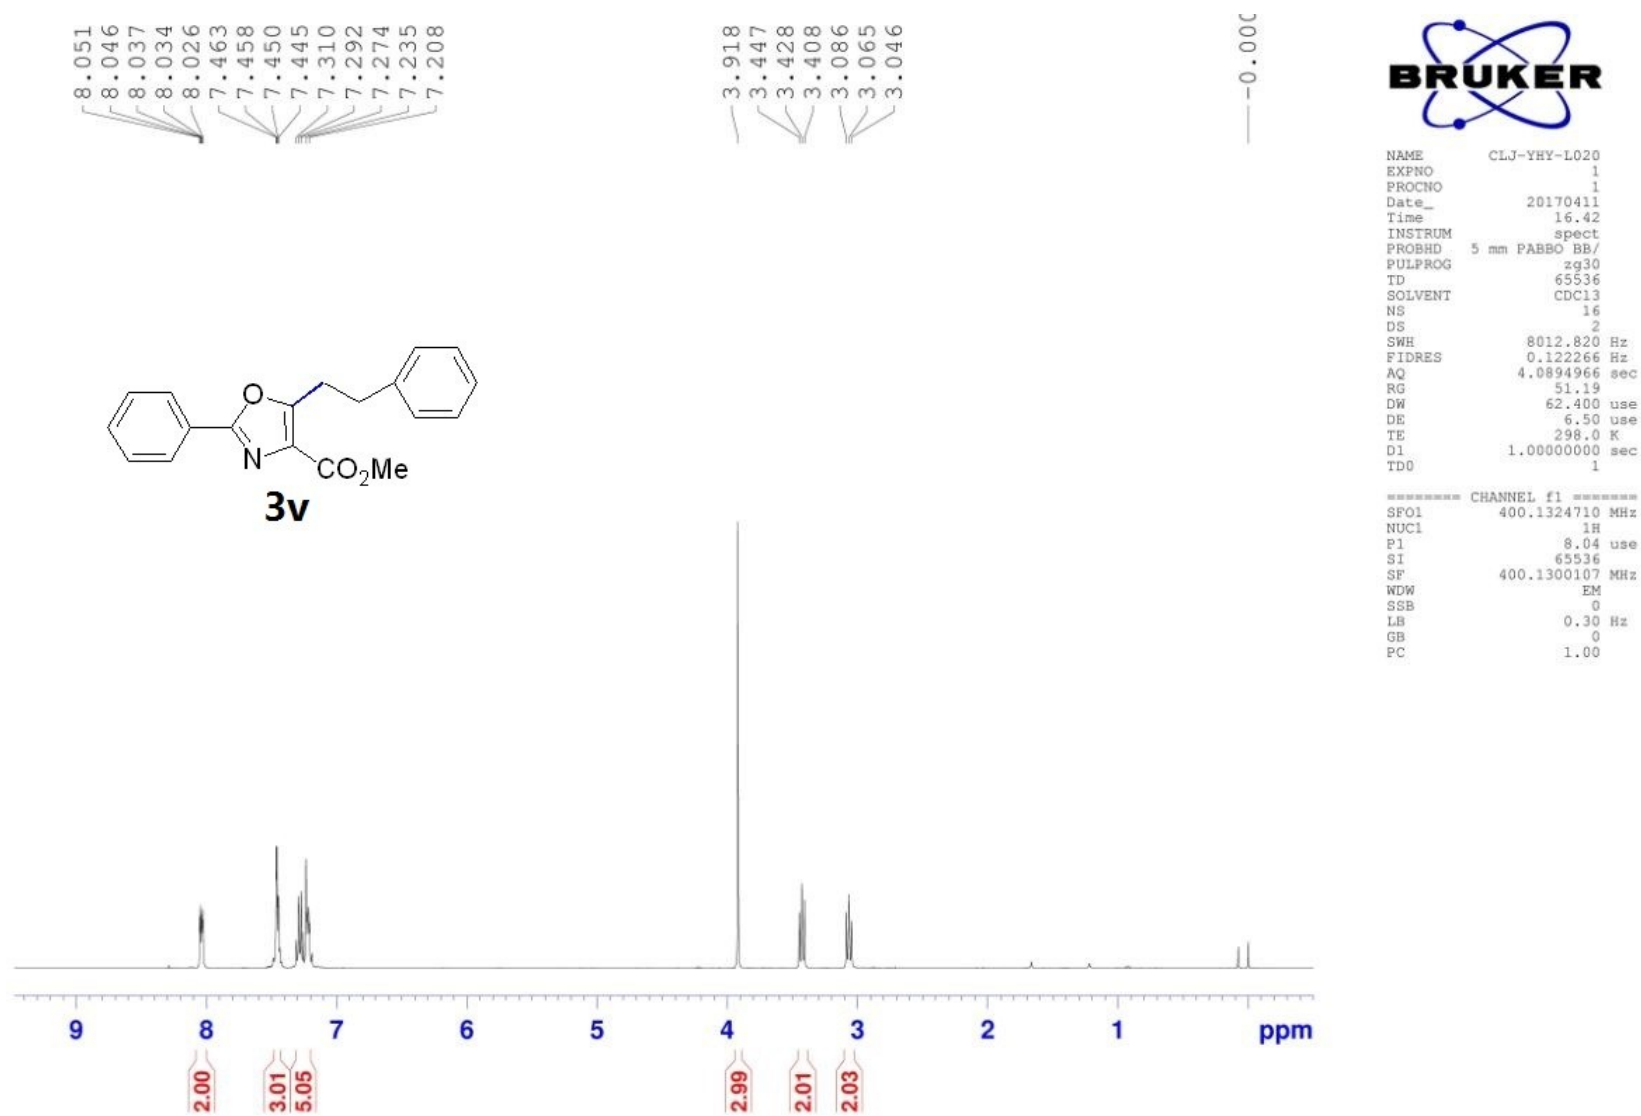

# Electronic Supplementary Information

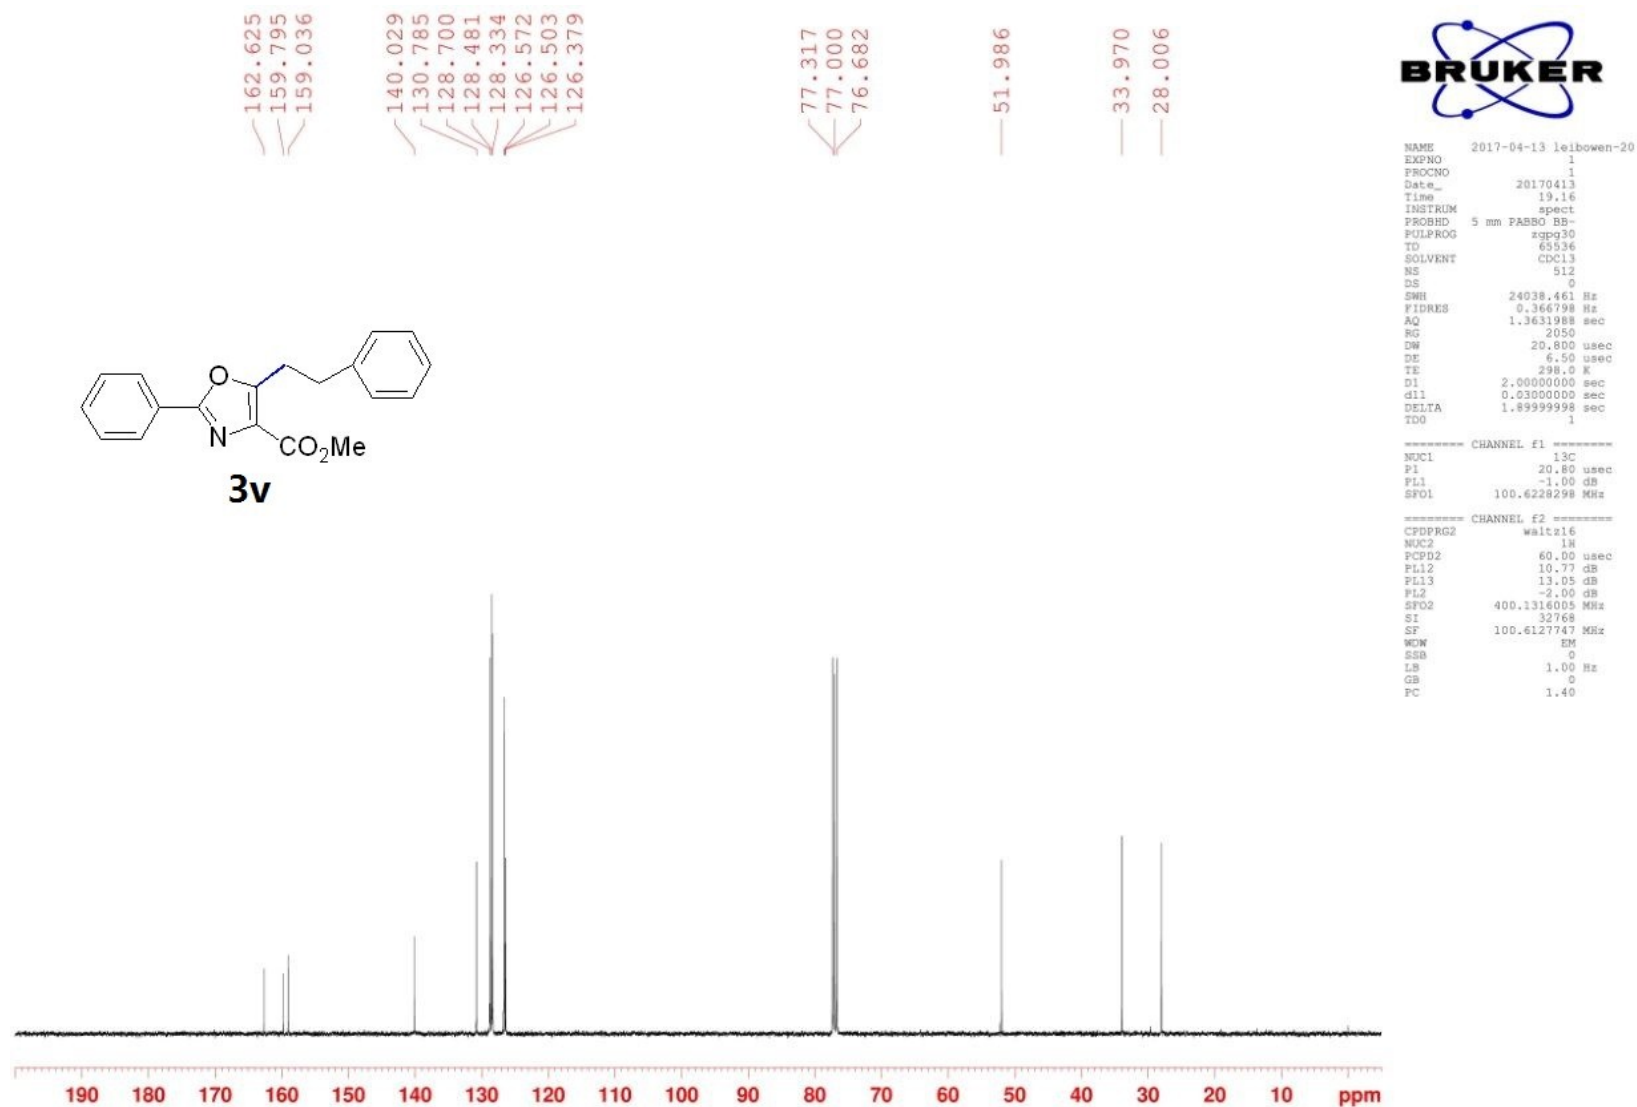

# Electronic Supplementary Information

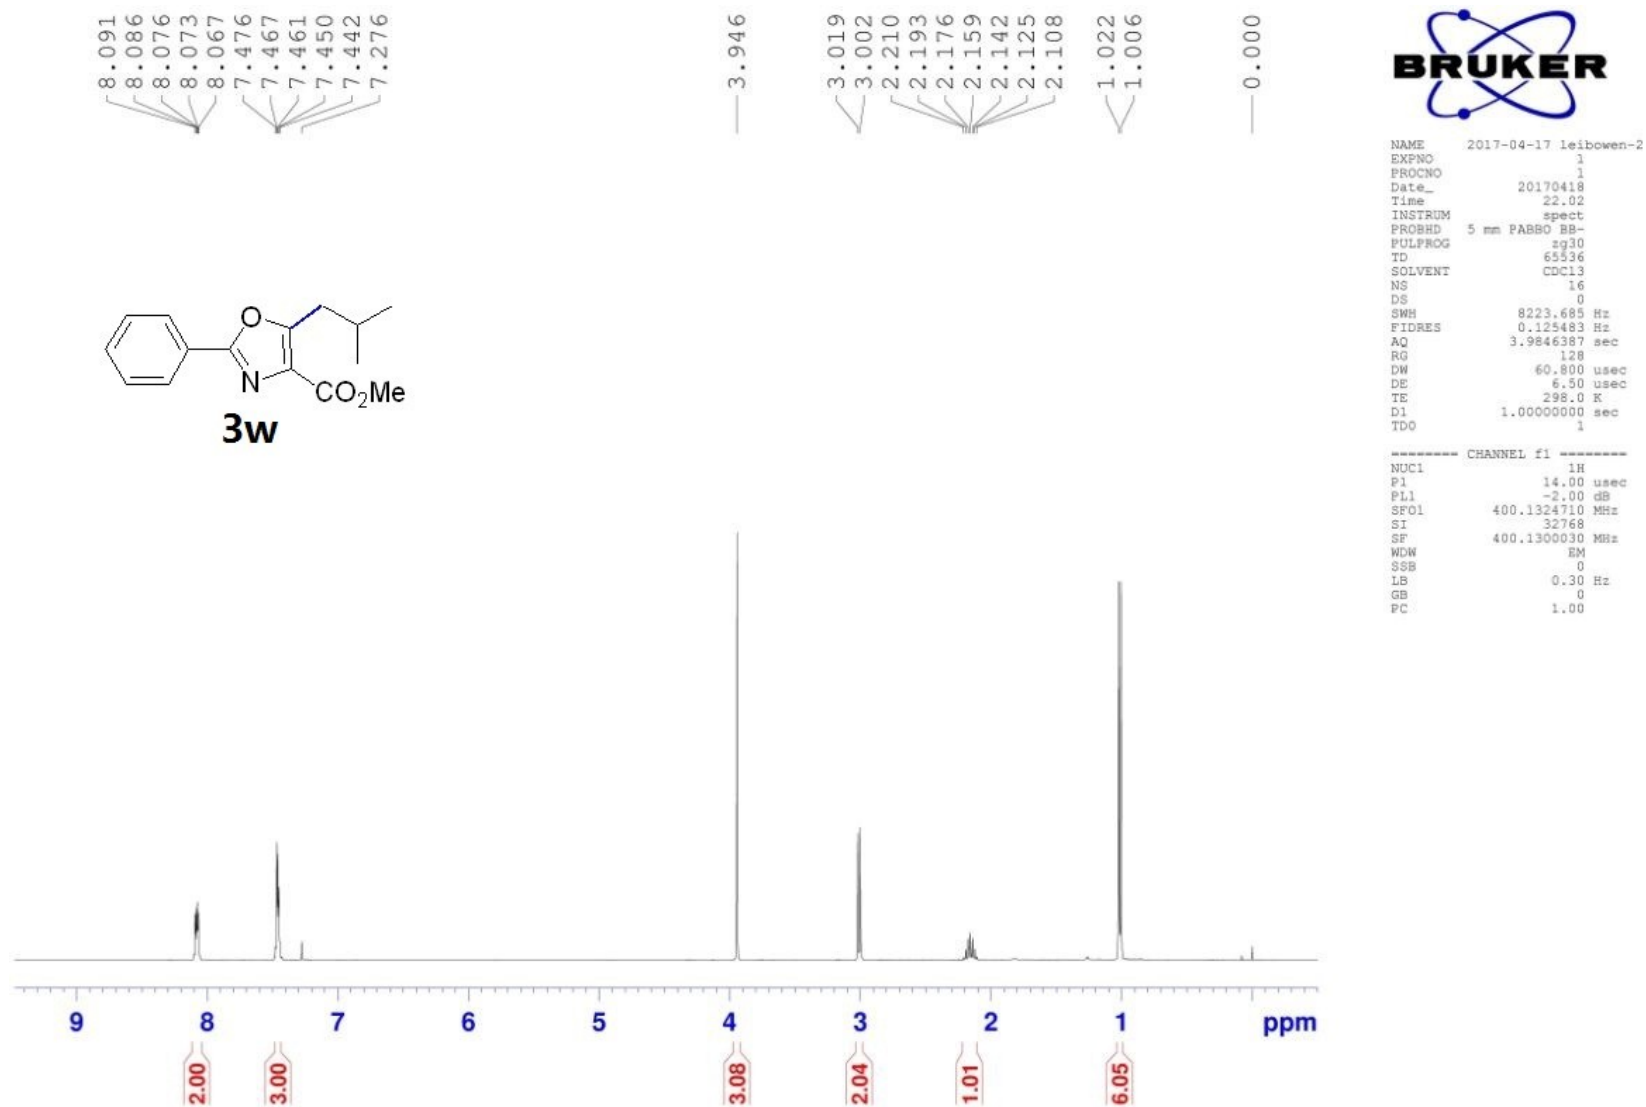

# Electronic Supplementary Information

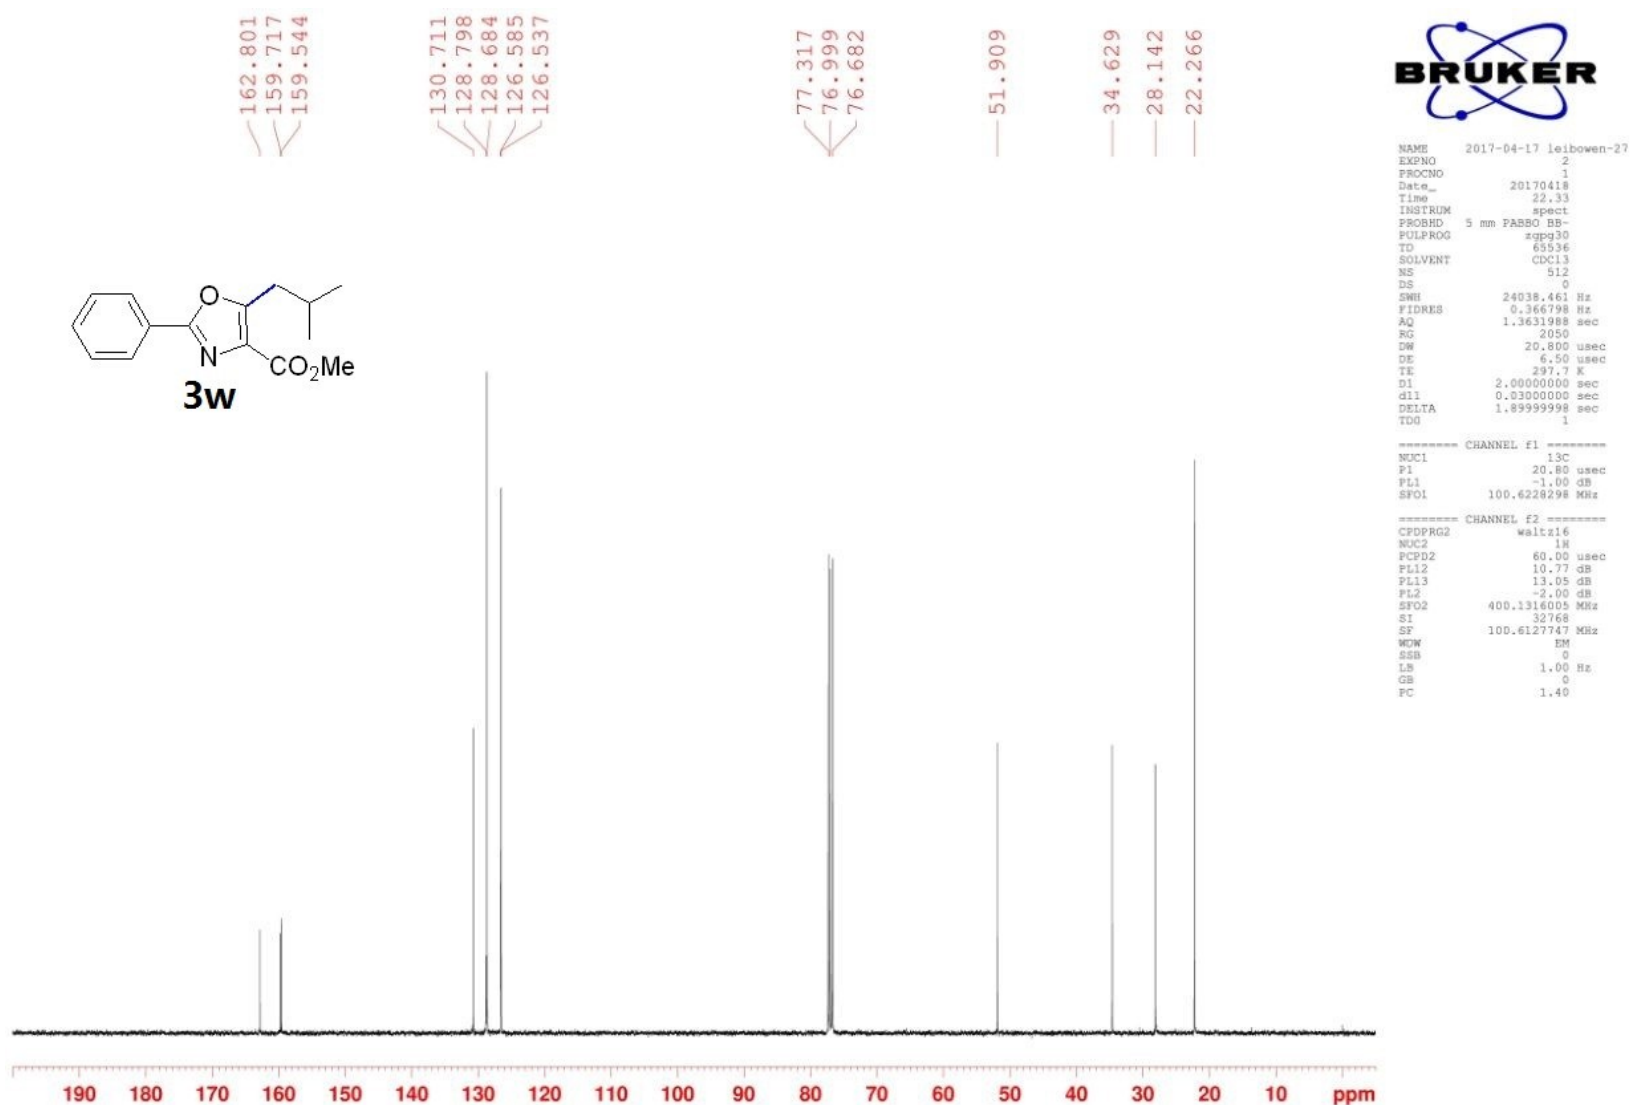

# Electronic Supplementary Information

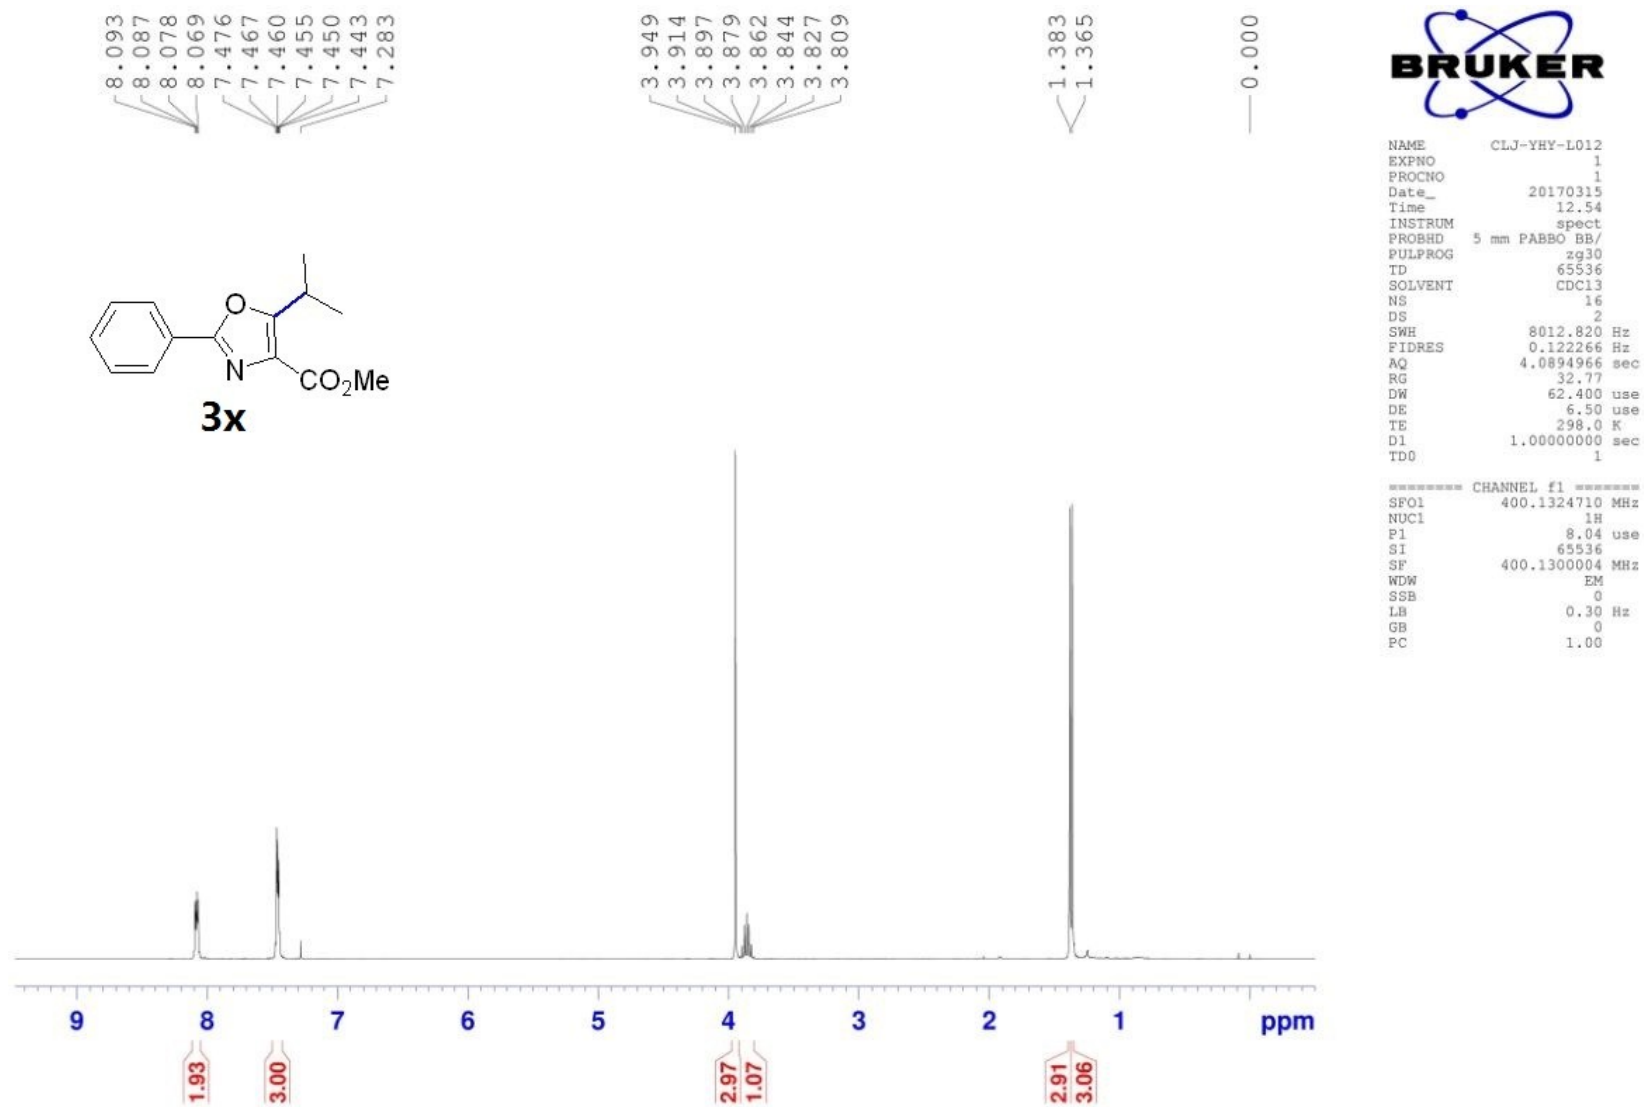

# Electronic Supplementary Information

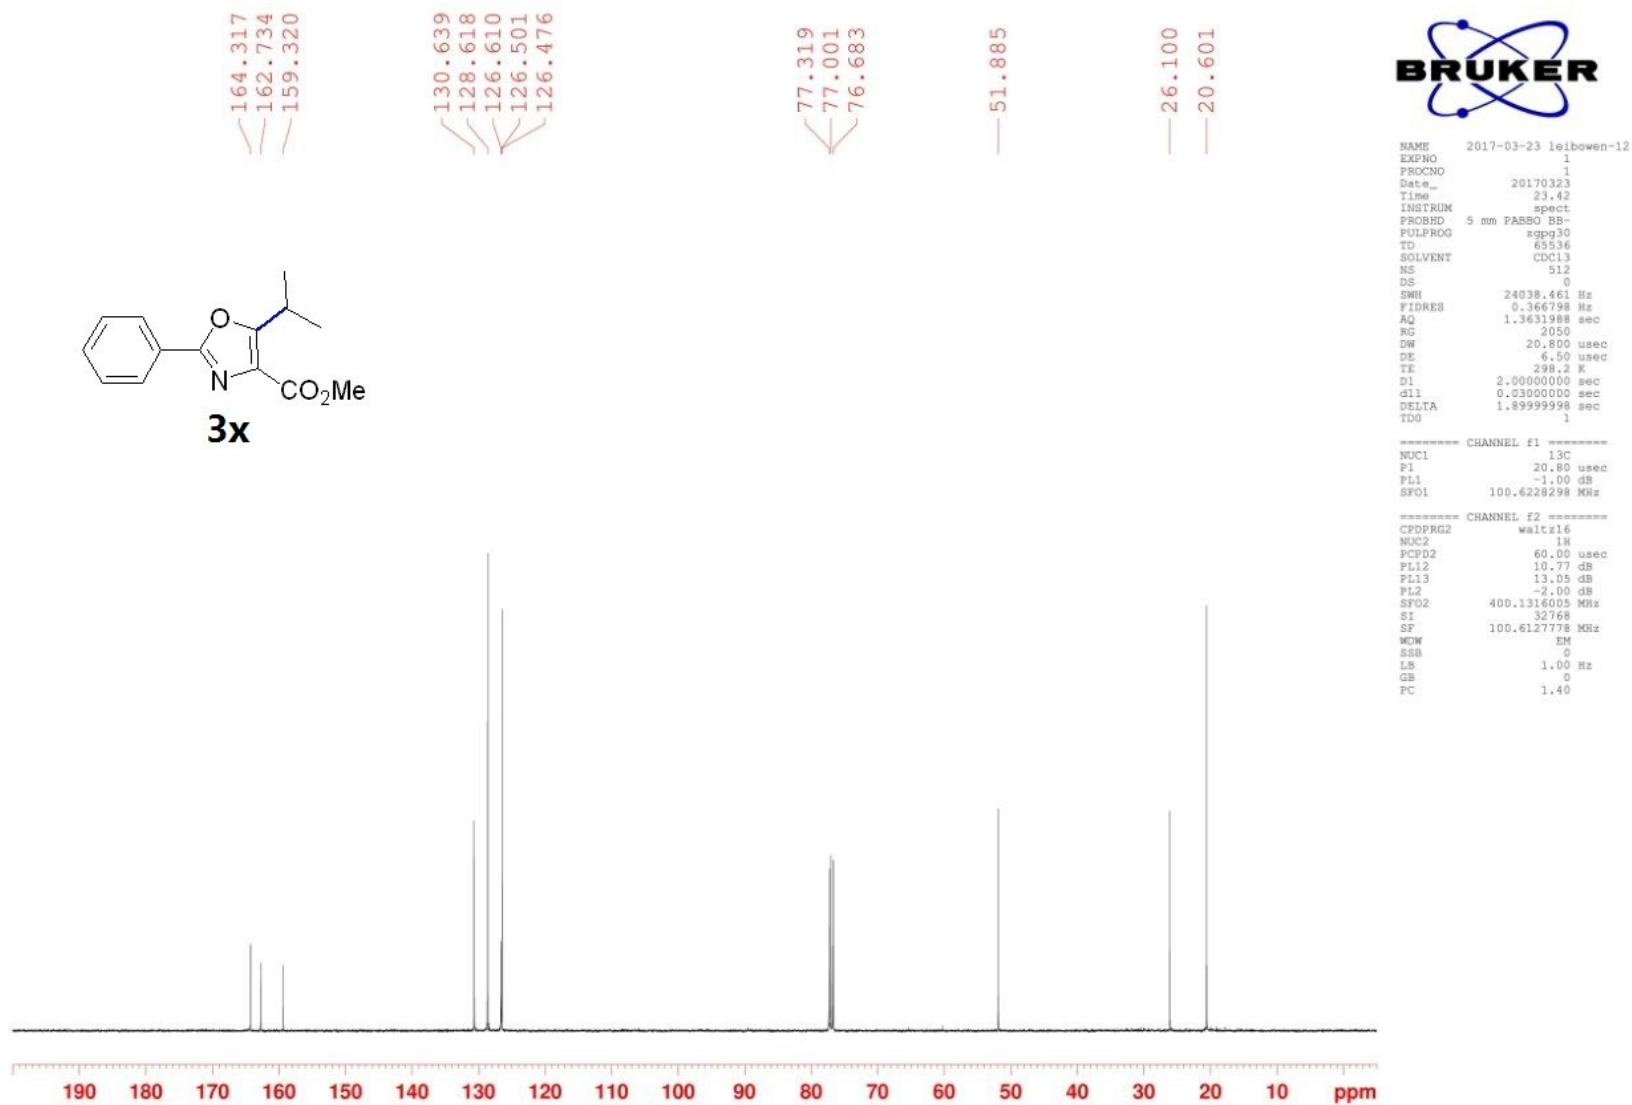

# Electronic Supplementary Information

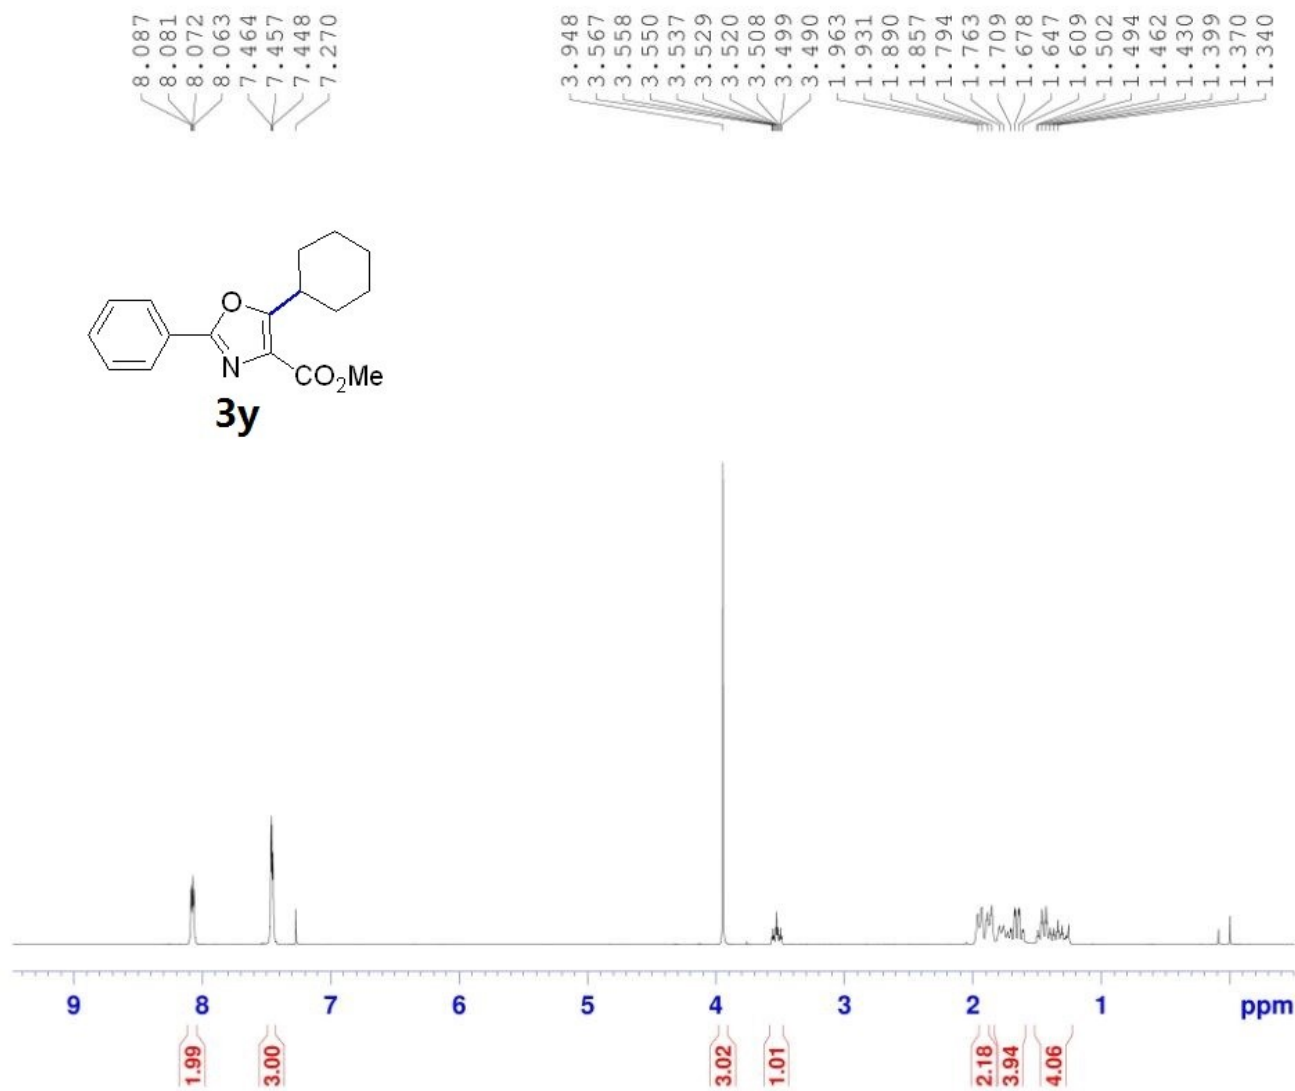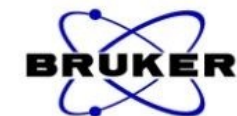

```

NAME      CLJ-YHY-L014
EXPNO     1
PROCNO    1
Date_     20170320
Time      11.49
INSTRUM   spect
PROBHD    5 mm PABBO BB/
PULPROG   zg30
TD        65536
SOLVENT   CDCl3
NS        16
DS        0
SWH       8012.820 Hz
FIDRES    0.122266 Hz
AQ        4.0894966 sec
RG        32.77
DW        62.400 use
DE        6.50 use
TE        298.0 K
D1        1.00000000 sec
TD0       1

===== CHANNEL f1 =====
SFO1      400.1324710 MHz
NUC1      1H
P1        8.04 use
SI        65536
SF        400.1300056 MHz
WDW       EM
SSB       0
LB        0.30 Hz
GB        0
PC        1.00
    
```

# Electronic Supplementary Information

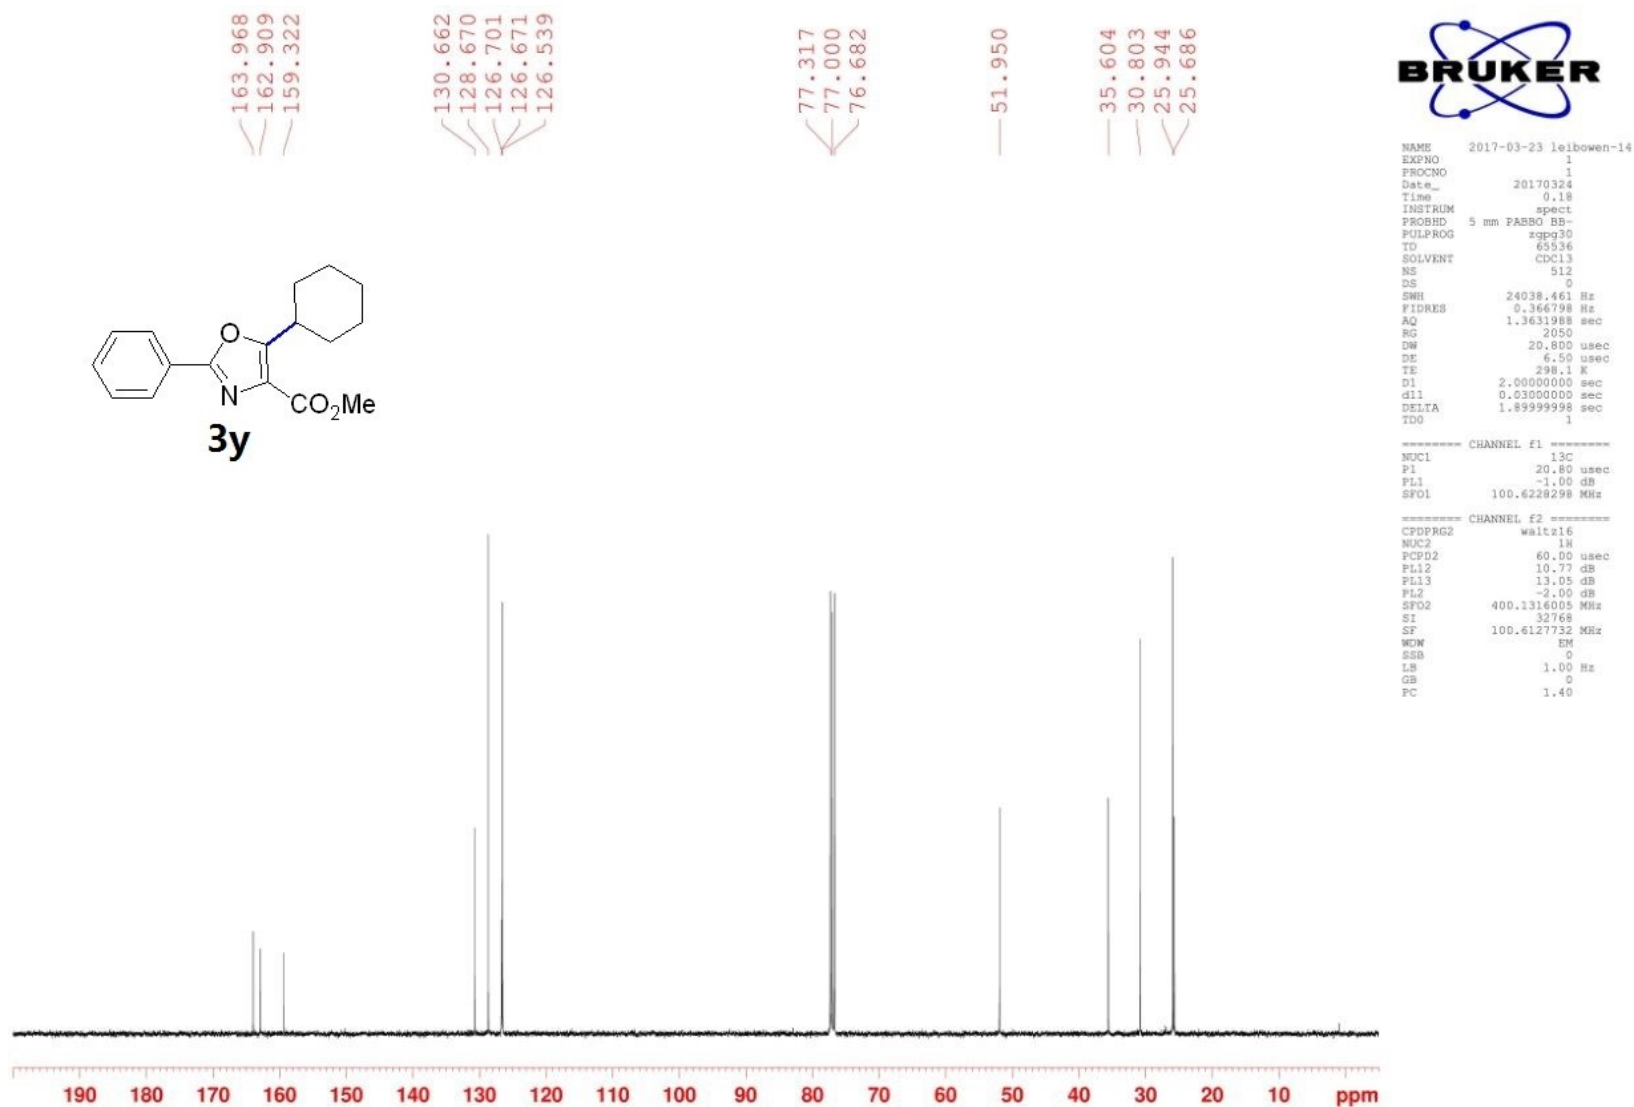

Supplement: c7ob01083d1.pdf [file c7ob01083d1.pdf]
